# Supplementary material
Source: publisher figshare collection journal article supplement (https://springernature.figshare.com/ndownloader/files/11470517)
Supplement: Supplementary file 1 [file 11470517]

## Sheet: work-1-40h_VS_common-40h_differ
gene_id	InterPro	kog	locus	work-1-40h_FPKM	common-40h_FPKM	log2Fold_change-work-1-40h/common-40h	p-value	FDR
CCH_e_gw1.2.1827.1	Ketopantoate reductase ApbA/PanE	-	chr_4_2:211431-212616	53.802	3.73193	3.84967	0.00832774	0.0142541
CCH_e_gw1.3.1019.1	Heat shock protein 9/12	-	chr_8_2:2663724-2664133	931.524	95.6301	3.28406	2.49e-21	1.54e-20
CCH_e_gw1.5.385.1	SUN	-	chr_4_1:598559-600871	524.577	197.576	1.40875	4.41e-06	1.08e-05
CCH_estExt_Genewise1.C_21136	RTA1 like protein	-	chr_4_2:1610406-1611682	116.203	14.922	2.96113	0.00911696	0.0155679
CCH_fgenesh1_pg.C_scaffold_1000297	-	-	chr_2_2:2809523-2810304	992.331	43.4236	4.51427	8.43e-51	1.25e-49
CCH_gw1.12.527.1	-	-	chr_3_1:52306-53526	66.8909	1.29877	5.68659	6.04e-05	0.000133165
e_gw1.1.1011.1	Peptidase, eukaryotic cysteine peptidase active site	KOG3349 Predicted glycosyltransferase	chr_2_2:2325433-2325974	198.614	16.0005	3.63378	1.02e-06	2.65e-06
e_gw1.1.1029.1	Uncharacterized Cys-rich domain;Aspartic acid and asparagine hydroxylation site	-	chr_2_2:3018912-3019489	582.358	215.271	1.43575	4.48e-06	1.1e-05
e_gw1.1.1047.1	-	-	chr_2_2:3354718-3355330	498.83	74.87	2.73609	7.5e-06	1.79e-05
e_gw1.1.1056.1	-	-	chr_2_2:301699-302032	617.43	9.15079	6.07624	9.88e-47	1.36e-45
e_gw1.1.1071.1	Transcription factor, MADS-box	-	chr_2_2:309971-310325	87.3648	6.07054	3.84716	0.000808691	0.0015744
e_gw1.1.1709.1	Eukaryotic protein of unknown function DUF914	KOG2766 Predicted membrane protein	chr_2_2:106817-108121	247.056	28.7851	3.10144	1.79e-05	4.14e-05
e_gw1.1.1824.1	-	-	chr_2_2:2787522-2789010	54.0832	0.132079	8.67764	8.02e-05	0.00017475
e_gw1.1.1844.1	-	-	chr_2_2:3443008-3443727	180.089	84.4486	1.09256	8.13e-06	1.93e-05
e_gw1.1.1980.1	Zn-finger, C-x8-C-x5-C-x3-H type	KOG1040 Polyadenylation factor I complex, subunit, Yth1 (CPSF subunit)	chr_2_2:1416800-1417418	47.2252	21.2628	1.15123	0.0253978	0.0411438
e_gw1.1.2014.1		KOG3989 Beta-2-glycoprotein I	chr_2_2:1658533-1659624	49.6051	2.2527	4.46076	0.00553353	0.00976512
e_gw1.1.2150.1	Actin-binding, cofilin/tropomyosin type	KOG1736 Glia maturation factor beta	chr_2_2:691815-692463	422.846	35.6495	3.56818	3.03e-13	1.25e-12
e_gw1.1.2667.1	Protein of unknown function DUF649;Calcium-binding EF-hand	KOG3114 Uncharacterized conserved protein	chr_2_2:816360-817291	384.328	47.5713	3.01417	4.45e-07	1.18e-06
e_gw1.1.2754.1	-	-	chr_2_2:477295-477796	4655.21	1528.34	1.60688	2.32e-17	1.21e-16
e_gw1.1.2789.1	DNA directed RNA polymerase, 7 kDa subunit;RNA polymerase Rbp10	KOG3507 DNA-directed RNA polymerase, subunit RPB7.0	chr_2_2:1860636-1860999	66.9293	3.26644	4.35685	0.000969267	0.00187111
e_gw1.1.973.1	Manganese and iron superoxide dismutase	KOG0876 Manganese superoxide dismutase	chr_2_2:3121480-3122235	116.357	9.45627	3.62114	0.000225747	0.000467217
e_gw1.1.998.1	Eukaryotic protein of unknown function DUF846	KOG3195 Uncharacterized membrane protein NPD008/CGI-148	chr_2_2:2178321-2179090	748.079	54.5936	3.77639	2.62e-26	2.03e-25
e_gw1.10.1239.1	Ribosomal protein S19/S15	KOG0899 Mitochondrial/chloroplast ribosomal protein S19	chr_8_1:1079276-1079981	3708.27	526.371	2.81659	4.18e-41	5e-40
e_gw1.10.294.1	Mg2+ transporter protein, CorA-like	-	chr_8_1:292601-293768	75.4314	30.138	1.32358	0.0301476	0.0475758
e_gw1.10.370.1	-	-	chr_8_1:1278576-1279556	294.294	44.6864	2.71935	0.000913068	0.00176974
e_gw1.10.420.1	-	-	chr_8_1:1491185-1491836	121.111	13.8514	3.12823	0.00266215	0.00485355
e_gw1.10.427.1	Defender against death DAD protein	KOG1746 Defender against cell death protein/oligosaccharyltransferase, epsilon subunit	chr_8_1:912657-913292	718.78	65.5179	3.45559	1.13e-19	6.54e-19
e_gw1.10.443.1	-	-	chr_8_1:1303061-1303765	451.288	24.191	4.22151	1.22e-20	7.36e-20
e_gw1.10.466.1	PpiC-type peptidyl-prolyl cis-trans isomerase	KOG3258 Parvulin-like peptidyl-prolyl cis-trans isomerase	chr_8_1:1019718-1020415	623.595	109.982	2.50334	0.000279059	0.000570985
e_gw1.11.1153.1	Lipolytic enzyme, G-D-S-L	-	chr_1_1:508506-509342	108.173	0.793232	7.09138	6.4e-10	2.13e-09
e_gw1.11.1212.1	-	-	chr_1_1:1408163-1408671	721.906	97.1505	2.89352	4.23e-10	1.43e-09
e_gw1.11.1213.1	-	-	chr_1_1:1039898-1040138	645.994	122.101	2.40345	0.00264038	0.00481822
e_gw1.11.172.1	Amino acid permease-associated region;Amino acid/polyamine transporter I	KOG1289 Amino acid transporters	chr_1_1:585365-587849	178.804	4.02249	5.47415	2.48e-12	9.75e-12
e_gw1.11.787.1	-	-	chr_1_1:1110802-1112071	84.0902	4.86142	4.11249	0.000181959	0.000379871
e_gw1.11.862.1	Haloacid dehalogenase-like hydrolase	-	chr_1_1:122329-123051	49.5813	3.02449	4.03503	0.016707	0.0278394
e_gw1.11.882.1	-	-	chr_1_1:1447566-1448475	150.278	6.377	4.55861	1.53e-08	4.59e-08
e_gw1.12.156.1	Peptidase aspartic, active site;Peptidase A1, pepsin	KOG1339 Aspartyl protease	chr_3_1:374939-376394	565.01	2.54176	7.7963	1.05e-50	1.55e-49
e_gw1.12.185.1	Glycosyltransferase sugar-binding region containing DXD motif	-	chr_3_1:173940-175112	588.701	19.8471	4.89053	3.81e-35	3.91e-34
e_gw1.12.222.1	Glycosyltransferase sugar-binding region containing DXD motif	-	chr_3_1:72829-73909	680.498	71.1349	3.25796	2.47e-15	1.16e-14
e_gw1.12.277.1	-	KOG1520 Predicted alkaloid synthase/Surface mucin Hemomucin	chr_3_1:1145174-1145949	234.518	22.4477	3.38506	1.21e-06	3.1e-06
e_gw1.12.623.1	-	-	chr_3_1:901822-902385	320.963	21.4692	3.90207	1.16e-12	4.63e-12
e_gw1.12.758.1	-	-	chr_3_1:324909-325921	109.843	52.4497	1.06644	0.000272425	0.000557638
e_gw1.12.834.1	Aminoacyl-tRNA synthetase, class I	-	chr_3_1:225309-225694	441.439	55.3029	2.99679	1.02e-07	2.86e-07
e_gw1.13.233.1	Zinc-containing alcohol dehydrogenase superfamily	KOG1198 Zinc-binding oxidoreductase	chr_6_2:697702-698928	838.669	7.5385	6.79768	9.87e-70	2.12e-68
e_gw1.13.274.1	-	KOG2447 Oligosaccharyltransferase, delta subunit (ribophorin II)	chr_6_2:899039-900091	348.86	25.9621	3.74817	1.12e-12	4.46e-12
e_gw1.13.631.1	-	-	chr_6_2:1044013-1044795	58.9331	4.8969	3.58914	0.0118631	0.0200465
e_gw1.13.644.1	-	-	chr_6_2:964831-965694	113.09	51.6929	1.12943	0.000936609	0.00181467
e_gw1.14.107.1	Amidase	KOG1212 Amidases	chr_6_1:1320394-1322309	33.4899	1.32111	4.6639	0.0225549	0.0367333
e_gw1.14.224.1	Glycoside hydrolase, family 12	-	chr_6_1:1243457-1244254	1178.61	98.665	3.5784	4.88e-35	4.99e-34
e_gw1.14.502.1	Ribosomal protein S16	KOG3419 Mitochondrial/chloroplast ribosomal protein S16	chr_6_1:1004672-1005056	317.282	57.6571	2.4602	0.0176431	0.0293459
e_gw1.14.636.1	YjeF-related protein, N-terminal	KOG2585 Uncharacterized conserved protein	chr_6_1:1003203-1004147	252.468	29.2173	3.11121	2.18e-05	4.95e-05
e_gw1.14.637.1	Carbonic anhydrase, prokaryotic and plant	KOG1578 Predicted carbonic anhydrase involved in protection against oxidative damage	chr_6_1:802481-803246	552.84	236.495	1.22505	1.08e-10	3.79e-10
e_gw1.14.668.1	Zn-finger, C2H2 type	KOG1721 FOG: Zn-finger	chr_6_1:1453211-1453367	4457.09	1608.32	1.47055	1.39e-31	1.27e-30
e_gw1.15.248.1	Ribosomal protein S28e	KOG3502 40S ribosomal protein S28	chr_2_1:267928-268228	20887.1	998.334	4.38695	0	0
e_gw1.15.397.1	Acyl-CoA dehydrogenase, C-terminal;Acyl-CoA dehydrogenase, central region	KOG0141 Isovaleryl-CoA dehydrogenase	chr_2_1:914176-915543	134.069	15.6591	3.0979	0.00224148	0.00411714
e_gw1.15.561.1	Amine oxidase;Flavin-containing amine oxidase	KOG0029 Amine oxidase	chr_2_1:621046-622887	312.668	2.98833	6.70915	9.85e-27	7.71e-26
e_gw1.16.236.1	Ras GTPase;Ras small GTPase, Rho type;Small GTP-binding protein domain;Ras small GTPase, Ras type;Ras small GTPase, Rab type	KOG0395 Ras-related GTPase	chr_5_1:917615-918360	786.846	264.07	1.57516	0.000122625	0.000260098
e_gw1.16.697.1	G-protein beta WD-40 repeat;Ubiquitin-conjugating enzymes	KOG0417 Ubiquitin-protein ligase	chr_5_1:113046-113616	642.263	63.8253	3.33096	6.37e-16	3.08e-15
e_gw1.16.707.1	Zn-finger, Tim10/DDP type	KOG3489 Mitochondrial import inner membrane translocase, subunit TIM8	chr_5_1:880839-881202	878.968	375.528	1.22689	4.57e-16	2.23e-15
e_gw1.16.73.1	Major facilitator superfamily;Tetracycline resistance protein TetB	KOG0254 Predicted transporter (major facilitator superfamily)	chr_5_1:341320-342911	36.4303	0.22849	7.31686	0.00375631	0.00676997
e_gw1.16.85.1	Amino acid/polyamine transporter I	KOG1289 Amino acid transporters	chr_5_1:686314-688453	44.8896	0.892001	5.65319	0.000684696	0.00133843
e_gw1.17.86.1	-	-	chr_6_2:1675638-1677069	161.314	19.159	3.07378	0.00118107	0.00226393
e_gw1.18.109.1	Major facilitator superfamily	KOG2504 Monocarboxylate transporter	chr_5_3:52861-54442	106.077	11.9969	3.14438	0.00415087	0.00745838
e_gw1.18.163.1	-	-	chr_5_3:489412-490397	74.9621	34.3591	1.12547	0.00418318	0.0075151
e_gw1.18.165.1	Eukaryotic protein of unknown function DUF850	KOG3188 Uncharacterized conserved protein	chr_5_3:195987-197035	462.16	76.8056	2.58911	0.000329527	0.000670436
e_gw1.18.173.1	Ureidoglycolate hydrolase	-	chr_5_3:364322-365086	342.896	42.0697	3.02692	2.44e-06	6.1e-06
e_gw1.18.179.1	-	-	chr_5_3:350341-351303	266.53	19.836	3.7481	6.02e-10	2e-09
e_gw1.18.194.1	-	-	chr_5_3:320115-320679	1910.02	249.183	2.93831	8.63e-27	6.76e-26
e_gw1.18.489.1	-	-	chr_5_3:468584-468968	814.529	144.039	2.49951	4.13e-05	9.21e-05
e_gw1.19.146.1	-	-	chr_6_1:245147-245873	72.8205	35.5582	1.03416	0.00177791	0.00329511
e_gw1.19.167.1	GCN5-related N-acetyltransferase	-	chr_6_1:97296-97978	278.935	9.28281	4.90922	6.73e-17	3.42e-16
e_gw1.19.200.1	-	-	chr_6_1:198619-198841	381663	303.85	10.2947	0	0
e_gw1.19.270.1	Amino acid permease;Amino acid permease-associated region;G-protein beta WD-40 repeat;Amino acid/polyamine transporter I	KOG1289 Amino acid transporters	chr_6_1:142175-144025	35.477	0.220452	7.33028	0.00366724	0.00661417
e_gw1.19.32.1	Amino acid/polyamine transporter II	KOG1303 Amino acid transporters	chr_6_1:179595-181600	6940.34	396.366	4.1301	3.8e-290	4.45e-288
e_gw1.19.383.1	-	-	chr_6_1:294893-295491	54.2243	24.778	1.12988	0.0180979	0.0298168
e_gw1.19.384.1	Ribonuclease III	-	chr_6_1:212715-213140	2949.71	109.967	4.74543	9.27e-163	5.13e-161
e_gw1.19.423.1	Amino acid permease-associated region;Amino acid/polyamine transporter I	KOG1289 Amino acid transporters	chr_6_1:100095-102002	779.574	34.4739	4.49911	5.87e-40	6.84e-39
e_gw1.19.509.1	-	-	chr_6_1:368090-369056	309.768	0.210282	10.5246	4.44e-29	3.74e-28
e_gw1.2.1052.1	NADH-ubiquinone oxidoreductase B18 subunit	KOG3468 NADH:ubiquinone oxidoreductase, NDUFB7/B18 subunit	chr_4_2:2511055-2511515	3764.33	578.945	2.70089	6e-33	5.77e-32
e_gw1.2.1847.1	-	KOG3701 TGFbeta receptor signaling protein SMAD and related proteins	chr_4_2:3072289-3073584	539.334	102.731	2.39231	0.00691567	0.012094
e_gw1.2.1915.1	HypB/UreG, nucleotide-binding;Urease accessory protein UreG	-	chr_4_2:434675-435639	756.788	111.334	2.76499	1.38e-08	4.17e-08
e_gw1.2.2026.1	-	-	chr_4_2:3070898-3071618	1378.96	237.936	2.53494	9.72e-09	2.96e-08
e_gw1.2.2103.1	-	-	chr_4_2:1271038-1271594	692.247	94.9288	2.86637	1.4e-09	4.54e-09
e_gw1.2.2112.1	-	-	chr_4_2:3116648-3118985	972.832	123.522	2.97742	3.79e-15	1.75e-14
e_gw1.2.2280.1	Major facilitator superfamily;Tetracycline resistance protein TetB	KOG0254 Predicted transporter (major facilitator superfamily)	chr_4_2:2126027-2127674	323.93	15.8661	4.35166	2.18e-16	1.08e-15
e_gw1.2.2296.1	Major facilitator superfamily;Tetracycline resistance protein TetB	KOG0254 Predicted transporter (major facilitator superfamily)	chr_4_2:3242017-3243702	82.0284	7.65133	3.42234	0.00565035	0.00996079
e_gw1.2.2332.1	FAD-dependent pyridine nucleotide-disulphide oxidoreductase;Flavoprotein monooxygenase;Aromatic-ring hydroxylase	KOG2614 Kynurenine 3-monooxygenase and related flavoprotein monooxygenases	chr_4_2:1306864-1308585	527.84	3.40351	7.27693	1.06e-45	1.44e-44
e_gw1.2.2566.1	Emopamil-binding	KOG4826 C-8,7 sterol isomerase	chr_4_2:1303277-1303948	264.065	22.4928	3.55336	1.68e-08	5e-08
e_gw1.2.2585.1	Glutathione-dependent formaldehyde-activating, GFA	-	chr_4_2:80454-81028	104.11	0.607971	7.41989	1.54e-09	4.98e-09
e_gw1.2.2590.1	Protein of unknown function DUF124	-	chr_4_2:3119586-3120550	2642.58	161.478	4.03254	1.77e-105	5.79e-104
e_gw1.2.2612.1	-	-	chr_4_2:2873612-2874345	60.481	3.36673	4.16706	0.00291425	0.00529018
e_gw1.2.940.1	Fumarylacetoacetate (FAA) hydrolase	KOG1535 Predicted fumarylacetoacetate hydralase	chr_4_2:2985201-2986072	612.76	58.5457	3.38769	5.54e-16	2.69e-15
e_gw1.2.985.1	-	-	chr_4_2:1026754-1027343	273.235	133.179	1.03678	3.44e-09	1.09e-08
e_gw1.20.193.1	Endonuclease/exonuclease/phosphatase	-	chr_6_3:212770-213667	106.931	13.7543	2.95873	0.017	0.028309
e_gw1.20.99.1	Protein of unknown function DUF298	KOG3077 Uncharacterized conserved protein	chr_6_3:280422-281062	258.034	86.2064	1.58169	0.0272616	0.0440851
e_gw1.3.1016.1	-	-	chr_8_2:192208-192709	206.227	24.9255	3.04854	0.000157465	0.00033169
e_gw1.3.1021.1	-	-	chr_8_2:865212-865588	131.098	16.1665	3.01957	0.00572798	0.0100959
e_gw1.3.1025.1	-	-	chr_8_2:381587-381975	4529	829.485	2.4489	2.12e-19	1.21e-18
e_gw1.3.1328.1	Major facilitator superfamily;Tetracycline resistance protein TetB	KOG0254 Predicted transporter (major facilitator superfamily)	chr_8_2:2889210-2891138	58.4514	26.1743	1.15909	0.0150496	0.0251734
e_gw1.3.1559.1	-	KOG1216 von Willebrand factor and related coagulation proteins	chr_8_2:170630-171775	52.2964	23.3289	1.16459	0.0227426	0.037027
e_gw1.3.1646.1	Nitrilase/cyanide hydratase;Glycoside hydrolase, family 10;Nitrilase/cyanide hydratase and apolipoprotein N-acyltransferase	KOG0805 Carbon-nitrogen hydrolase	chr_8_2:3120668-3121795	90.6327	7.74185	3.54928	0.00157449	0.00296945
e_gw1.3.1939.1	-	-	chr_8_2:964947-965282	54.8483	2.86226	4.26022	0.00271654	0.00495092
e_gw1.3.1942.1	UcrQ	KOG4116 Ubiquinol cytochrome c reductase, subunit QCR8	chr_8_2:1559595-1559942	6710.39	755.364	3.15115	1.11e-123	4.56e-122
e_gw1.3.2200.1	-	KOG1441 Glucose-6-phosphate/phosphate and phosphoenolpyruvate/phosphate antiporter	chr_8_2:3006749-3008175	385.809	67.3709	2.51769	0.00419508	0.00753514
e_gw1.3.2410.1	Ribosomal protein L7AE;High mobility group-like nuclear protein;Ribosomal protein L7Ae/L30e/S12e/Gadd45	KOG3167 Box H/ACA snoRNP component, involved in ribosomal RNA pseudouridinylation	chr_8_2:1586141-1586715	152.253	64.4476	1.24027	0.00094852	0.00183246
e_gw1.3.2417.1	-	-	chr_8_2:1073689-1074064	3881.32	315.155	3.62241	3.07e-116	1.12e-114
e_gw1.3.2432.1	-	-	chr_8_2:689144-689321	4377.34	170.315	4.68378	5.24e-235	4.51e-233
e_gw1.3.602.1	Leucine carboxyl methyltransferase	KOG2918 Carboxymethyl transferase	chr_8_2:1699013-1700186	117.187	16.9085	2.79299	0.0244495	0.039665
e_gw1.3.737.1	-	-	chr_8_2:1061706-1062868	703.968	106.663	2.72245	1.82e-07	5e-07
e_gw1.3.895.1	Initiation factor 3	-	chr_8_2:1082821-1083510	134.794	61.3685	1.13519	0.000248825	0.000514031
e_gw1.3.952.1	-	-	chr_8_2:1905173-1905707	196.863	69.1376	1.50965	0.0182203	0.029994
e_gw1.3.962.1	-	-	chr_8_2:2143694-2144249	466.024	23.0147	4.33978	1.69e-22	1.1e-21
e_gw1.3.991.1	-	-	chr_8_2:2252630-2253209	1043.65	11.2302	6.53811	4.74e-84	1.18e-82
e_gw1.4.1053.1	Amino acid permease-associated region;Amino acid/polyamine transporter I	KOG1286 Amino acid transporters	chr_7_1:1571649-1573544	357.651	20.5219	4.12332	6.16e-16	2.98e-15
e_gw1.4.1439.1	-	KOG4401 Uncharacterized conserved protein	chr_7_1:546391-547247	642.822	81.847	2.97342	1.91e-10	6.62e-10
e_gw1.4.1467.1	-	-	chr_7_1:2489762-2490612	186.167	72.5225	1.3601	0.00255474	0.00467464
e_gw1.4.1469.1	Cytochrome c heme-binding site;Glutathione-dependent formaldehyde-activating, GFA	-	chr_7_1:2049067-2049657	185.569	28.6918	2.69325	0.0135748	0.0227708
e_gw1.4.610.1	Coenzyme Q biosynthesis Coq4	KOG3244 Protein involved in ubiquinone biosynthesis	chr_7_1:2455895-2456828	502.126	90.835	2.46673	0.00217628	0.00400176
e_gw1.4.773.1	Ribosomal protein S27E	KOG1779 40s ribosomal protein S27	chr_7_1:2379682-2380007	4502.48	404.627	3.47606	8.84e-119	3.39e-117
e_gw1.5.1144.1	-	-	chr_4_1:514483-515810	353.544	39.7942	3.15126	1.11e-07	3.1e-07
e_gw1.5.1197.1	-	-	chr_4_1:1959951-1960913	497.334	74.8033	2.73304	9.26e-06	2.2e-05
e_gw1.5.1282.1	Ssu72-like protein	KOG2424 Protein involved in transcription start site selection	chr_4_1:1892029-1892830	151.646	63.4419	1.2572	0.00121759	0.00233082
e_gw1.5.1321.1	-	-	chr_4_1:2259824-2260308	1134.7	150.987	2.90981	5.96e-16	2.89e-15
e_gw1.5.1599.1	G-protein beta WD-40 repeat	KOG2111 Uncharacterized conserved protein, contains WD40 repeats	chr_4_1:1183226-1184626	76.9001	33.7158	1.18956	0.00915829	0.0156332
e_gw1.5.1708.1	-	KOG0255 Synaptic vesicle transporter SVOP and related transporters (major facilitator superfamily)	chr_4_1:1446483-1447149	323.206	43.7959	2.88359	3.1e-05	6.98e-05
e_gw1.5.1709.1	Peptide methionine sulfoxide reductase	KOG1635 Peptide methionine sulfoxide reductase	chr_4_1:1701378-1702072	252.522	88.4561	1.51338	0.0104524	0.0177969
e_gw1.5.1757.1	Ras GTPase;Ras small GTPase, Rho type;Ras small GTPase, Ras type;Ras small GTPase, Rab type	KOG0098 GTPase Rab2, small G protein superfamily	chr_4_1:2421609-2422133	417.035	144.913	1.52498	0.00163784	0.00308603
e_gw1.5.501.1	-	-	chr_4_1:684480-685589	184.014	28.107	2.71081	0.013458	0.0225825
e_gw1.5.580.1	Protein of unknown function DUF1275	-	chr_4_1:191409-192249	82.0696	4.24316	4.27364	0.000263615	0.000540703
e_gw1.5.587.1	-	-	chr_4_1:359148-359873	119.167	3.60138	5.04829	6.31e-08	1.8e-07
e_gw1.5.989.1	Hly-III related proteins	KOG0748 Predicted membrane proteins, contain hemolysin III domain	chr_4_1:2156833-2158392	41.8376	19.057	1.13448	0.025931	0.0419603
e_gw1.6.1091.1	Thioesterase superfamily	-	chr_3_4:1613804-1614415	225.967	94.8197	1.25285	7.06e-05	0.000154175
e_gw1.6.1095.1	-	KOG1869 Splicing coactivator SRm160/300, subunit SRm300	chr_3_4:339307-339931	83.1055	39.9542	1.0566	0.00163708	0.00308518
e_gw1.6.1130.1	ABC transporter;Protein of unknown function UPF0136	KOG4267 Predicted membrane protein	chr_3_4:1850078-1850524	1357.89	176.846	2.9408	1.18e-19	6.83e-19
e_gw1.6.1368.1	-	-	chr_3_4:1548474-1549194	355.181	114.322	1.63545	0.0292731	0.0462465
e_gw1.6.1401.1	Ubiquitin-conjugating enzymes	KOG0428 Non-canonical ubiquitin conjugating enzyme 1	chr_3_4:1666568-1666940	102.763	47.6288	1.10941	0.000790179	0.00153866
e_gw1.6.364.1	Parallel beta-helix repeat;Glycoside hydrolase, family 28	-	chr_3_4:1288538-1289679	1222.02	0.106615	13.4846	1.98e-118	7.48e-117
e_gw1.6.406.1	Malate dehydrogenase, NAD-dependent, eukaryotes and gamma proteobacteria;Lactate/malate dehydrogenase	KOG1494 NAD-dependent malate dehydrogenase	chr_3_4:32357-33746	2380.87	705.726	1.75431	0.000436783	0.000868137
e_gw1.6.510.1	-	-	chr_3_4:191128-191811	115.824	11.1451	3.37745	0.00131355	0.00251022
e_gw1.6.549.1	Glutathione-dependent formaldehyde-activating, GFA	-	chr_3_4:933057-933592	132.37	58.5687	1.17637	0.000601998	0.00118714
e_gw1.6.578.1	Small nuclear ribonucleoprotein (Sm protein);snRNP	KOG3482 Small nuclear ribonucleoprotein (snRNP) SMF	chr_3_4:1350803-1351302	402.134	13.8085	4.86405	4.81e-24	3.41e-23
e_gw1.6.725.1	Metallophosphoesterase	KOG3662 Cell division control protein/predicted DNA repair exonuclease	chr_3_4:950651-952692	42.2523	19.0625	1.14829	0.0283016	0.0448241
e_gw1.6.754.1	TGF-beta receptor, type I/II extracellular region	KOG1237 H+/oligopeptide symporter	chr_3_4:1796857-1798643	543.273	4.06458	7.06243	6.83e-46	9.32e-45
e_gw1.7.1036.1	Major facilitator superfamily	KOG2504 Monocarboxylate transporter	chr_5_2:376447-377938	208.948	21.9955	3.24786	1.74e-05	4.04e-05
e_gw1.7.1061.1	C4-dicarboxylate transporter/malic acid transport protein	-	chr_5_2:74707-75832	98.588	0.641797	7.26315	5.7e-09	1.76e-08
e_gw1.7.337.1	Aldo/keto reductase	KOG1577 Aldo/keto reductase family proteins	chr_5_2:1395834-1396961	257.755	12.2558	4.39446	3.92e-13	1.61e-12
e_gw1.7.407.1	Erv1/Alr	KOG3355 Mitochondrial sulfhydryl oxidase involved in the biogenesis of cytosolic Fe/S proteins	chr_5_2:855887-856619	115.114	49.5373	1.21648	0.00262472	0.00480094
e_gw1.7.461.1	Glyoxalase/bleomycin resistance protein/dioxygenase	-	chr_5_2:278522-279000	160.843	5.08987	4.98188	4.92e-10	1.65e-09
e_gw1.7.714.1	Major facilitator superfamily;General substrate transporter;Sugar transporter superfamily;Sugar transporter	KOG0254 Predicted transporter (major facilitator superfamily)	chr_5_2:356957-358521	279.738	2.99718	6.54433	1.62e-23	1.11e-22
e_gw1.7.834.1	Class II aldolase/adducin, N-terminal	KOG3699 Cytoskeletal protein Adducin	chr_5_2:1071052-1072220	290.028	122.66	1.24153	5.41e-06	1.3e-05
e_gw1.7.987.1	Low affinity iron permease	-	chr_5_2:1694412-1695850	81.1049	6.99602	3.53518	0.00218999	0.00402549
e_gw1.8.1011.1	GCN5-related N-acetyltransferase	KOG3216 Diamine acetyltransferase	chr_1_2:775219-775849	57.0378	26.1093	1.12735	0.0142503	0.0238841
e_gw1.8.1025.1	YjgF-like protein;Endoribonuclease L-PSP	KOG2317 Putative translation initiation inhibitor UK114/IBM1	chr_1_2:224330-224855	1084.41	129.085	3.07052	4.99e-19	2.82e-18
e_gw1.8.1302.1	-	-	chr_1_2:1097160-1097339	509.951	1e-05	25.6039	1.25e-48	1.78e-47
e_gw1.8.337.1	2OG-Fe(II) oxygenase superfamily;Isopenicillin N synthase	KOG0143 Iron/ascorbate family oxidoreductases	chr_1_2:1619736-1620883	141.025	53.9657	1.38584	0.016058	0.0268069
e_gw1.8.868.1	-	KOG3945 Uncharacterized conserved protein	chr_1_2:234491-235860	210.979	102.047	1.04787	2.27e-07	6.21e-07
e_gw1.8.960.1	Short-chain dehydrogenase/reductase SDR;Glucose/ribitol dehydrogenase	KOG1014 17 beta-hydroxysteroid dehydrogenase type 3, HSD17B3	chr_1_2:1301817-1302799	59.4333	28.6965	1.0504	0.007719	0.0132346
e_gw1.83.1.1	-	-	chr_3_4:1574121-1577485	74.9773	1e-05	22.838	1.06e-06	2.74e-06
e_gw1.9.1179.1	Cytochrome b5	KOG0537 Cytochrome b5	chr_3_2:98383-98813	1503.86	162.326	3.2117	6.54e-31	5.84e-30
e_gw1.9.381.1	-	KOG4297 C-type lectin	chr_3_2:1248531-1249273	330.494	115.765	1.51342	0.00387496	0.00697382
e_gw1.9.394.1	Transcriptional coactivator p15	KOG2712 Transcriptional coactivator	chr_3_2:24414-24970	1152.95	196.888	2.54988	8.26e-08	2.32e-07
e_gw1.9.679.1	-	-	chr_3_2:1575670-1577101	88.0046	0.11426	9.58911	5.06e-08	1.46e-07
e_gw1.9.735.1	Glyceraldehyde-3-phosphate dehydrogenase, type I;Glyceraldehyde 3-phosphate dehydrogenase	KOG0657 Glyceraldehyde 3-phosphate dehydrogenase	chr_3_2:992343-993618	404.206	1e-05	25.2686	2.28e-38	2.54e-37
e_gw1.9.819.1	Peptidase M, neutral zinc metallopeptidases, zinc-binding site	KOG3314 Ku70-binding protein	chr_3_2:51249-52107	149.467	57.2932	1.38339	0.00939076	0.0160164
e_gw1.9.888.1	Protein of unknown function DUF788	KOG3269 Predicted membrane protein	chr_3_2:386471-386992	354.161	52.672	2.7493	0.000162608	0.000341666
e_gw1.9.909.1	-	-	chr_3_2:531350-531931	124.919	10.8299	3.5279	0.000160308	0.000337115
e_gw1.9.910.1	-	-	chr_3_2:1305027-1305353	101.467	40.9041	1.31069	0.0163728	0.0273188
e_gw1.973.2.1	-	-	chr_6_1:668680-669156	96871.4	10743.6	3.17259	0	0
estExt_GeneWisePlus.C_100324	Endoplasmic reticulum targeting sequence;Thioredoxin domain 2;Thioredoxin-related;Disulphide isomerase	KOG0191 Thioredoxin/protein disulfide isomerase	chr_8_1:407058-408374	1107.94	110.752	3.32248	3.52e-26	2.71e-25
estExt_GeneWisePlus.C_100488	Ankyrin;Porphobilinogen deaminase	KOG2892 Porphobilinogen deaminase	chr_8_1:675004-676206	71.4083	34.9674	1.03008	0.00245101	0.00448729
estExt_GeneWisePlus.C_100494	Ribosomal L23 protein	KOG4089 Predicted mitochondrial ribosomal protein L23	chr_8_1:679971-681204	199.601	77.7034	1.36107	0.00213389	0.00393748
estExt_GeneWisePlus.C_100732	Mitochondrial substrate carrier;Adenine nucleotide translocator 1;Mitochondrial carrier protein	KOG0749 Mitochondrial ADP/ATP carrier proteins	chr_8_1:1005733-1007616	25160.7	5185.11	2.27873	1.43e-45	1.94e-44
estExt_GeneWisePlus.C_100757	Ribosomal protein S12E;Ribosomal protein L7Ae/L30e/S12e/Gadd45	KOG3406 40S ribosomal protein S12	chr_8_1:1031746-1032634	4170.3	676.697	2.62357	3.39e-30	2.96e-29
estExt_GeneWisePlus.C_100813	RHO protein GDP dissociation inhibitor	KOG3205 Rho GDP-dissociation inhibitor	chr_8_1:1100686-1101983	456.402	176.825	1.36798	4.07e-06	9.98e-06
estExt_GeneWisePlus.C_100872	-	-	chr_8_1:1172765-1173744	5350.81	1083.65	2.30386	2.52e-12	9.88e-12
estExt_GeneWisePlus.C_100876	KOW;Ribosomal protein L27e	KOG3418 60S ribosomal protein L27	chr_8_1:1176795-1177903	3864.78	1146.76	1.75282	6.22e-06	1.49e-05
estExt_GeneWisePlus.C_100879	TRAM, LAG1 and CLN8 homology;Eukaryotic protein of unknown function DUF887	KOG4561 Uncharacterized conserved protein, contains TBC domain	chr_8_1:1186235-1187660	191.672	90.6645	1.08003	2.65e-06	6.61e-06
estExt_GeneWisePlus.C_100996	Phosphopantetheine attachment site;Phosphopantetheine-binding;Acyl carrier protein (ACP)	KOG1748 Acyl carrier protein/NADH-ubiquinone oxidoreductase, NDUFAB1/SDAP subunit	chr_8_1:1309556-1310506	8845.45	974.299	3.1825	4.76e-169	2.79e-167
estExt_GeneWisePlus.C_101027	Ribosomal protein S26E	KOG1768 40s ribosomal protein S26	chr_8_1:1348844-1350048	4407.85	1343.8	1.71376	1.11e-08	3.36e-08
estExt_GeneWisePlus.C_101187	G-protein beta WD-40 repeat	KOG1523 Actin-related protein Arp2/3 complex, subunit ARPC1/p41-ARC	chr_8_1:1541425-1542761	464.49	166.976	1.47601	0.000200241	0.000416483
estExt_GeneWisePlus.C_101217	Protein of unknown function DUF396	KOG4136 Predicted mitochondrial cholesterol transporter	chr_8_1:1568956-1570007	372.802	46.3642	3.00733	1.03e-06	2.67e-06
estExt_GeneWisePlus.C_10318	Peptidase C13, legumain	KOG1349 Gpi-anchor transamidase	chr_2_2:3377007-3378240	94.6399	43.6371	1.11689	0.0014652	0.00277111
estExt_GeneWisePlus.C_10345	-	-	chr_2_2:3336306-3338105	68.4414	30.187	1.18094	0.0121758	0.0205439
estExt_GeneWisePlus.C_10486	Glycoside hydrolase, family 47	KOG2204 Mannosyl-oligosaccharide alpha-1,2-mannosidase and related glycosyl hydrolases	chr_2_2:3123524-3125308	885.091	15.6332	5.82314	6.91e-65	1.38e-63
estExt_GeneWisePlus.C_10541	Small nuclear ribonucleoprotein (Sm protein);snRNP	KOG1781 Small Nuclear ribonucleoprotein splicing factor	chr_2_2:3052271-3053085	1647.34	164.268	3.32601	2.95e-38	3.29e-37
estExt_GeneWisePlus.C_10581	Zinc-containing alcohol dehydrogenase superfamily	KOG0023 Alcohol dehydrogenase, class V	chr_2_2:3010808-3012079	41.4741	0.0909245	8.83333	0.00103508	0.00199395
estExt_GeneWisePlus.C_10717	Peptidase M24A, methionine aminopeptidase, subfamily 2;Peptidase M24, methionine aminopeptidase;Peptidase M24	KOG2775 Metallopeptidase	chr_2_2:2812478-2814221	115.439	53.2302	1.11681	0.000387332	0.000782981
estExt_GeneWisePlus.C_10971	-	-	chr_2_2:2480230-2481627	182.428	29.2299	2.64181	0.0262914	0.0425367
estExt_GeneWisePlus.C_110190	60 kDa inner membrane protein	KOG1239 Inner membrane protein translocase involved in respiratory chain assembly	chr_1_1:1409273-1410727	135.353	57.6123	1.23228	0.00166122	0.00312366
estExt_GeneWisePlus.C_110203	Ribosomal protein L1	KOG1569 50S ribosomal protein L1	chr_1_1:1400211-1401277	118.687	58.2394	1.02709	5.36e-05	0.000118742
estExt_GeneWisePlus.C_110421	-	-	chr_1_1:1113850-1115486	168.004	10.5722	3.99015	1.36e-07	3.77e-07
estExt_GeneWisePlus.C_110427	Major facilitator superfamily;General substrate transporter;Sugar transporter superfamily;Sugar transporter	KOG0254 Predicted transporter (major facilitator superfamily)	chr_1_1:1107343-1109561	308.199	17.3782	4.14851	5.77e-14	2.5e-13
estExt_GeneWisePlus.C_110860	Lipase 3, N-terminal;Lipase, active site;Lipase, class 3	KOG4569 Predicted lipase	chr_1_1:510746-511986	3705.62	0.982056	11.8816	0	0
estExt_GeneWisePlus.C_111100	Glycolipid anchored surface protein GAS1	KOG3599 Ca2+-modulated nonselective cation channel polycystin	chr_1_1:191143-193102	1999.23	162.938	3.61705	1.39e-60	2.54e-59
estExt_GeneWisePlus.C_111102	Oligopeptide transporter OPT superfamily	KOG2262 Sexual differentiation process protein ISP4	chr_1_1:186436-189058	570.884	25.2337	4.49977	2.89e-29	2.46e-28
estExt_GeneWisePlus.C_111117	Short-chain dehydrogenase/reductase SDR;Glucose/ribitol dehydrogenase	KOG1209 1-Acyl dihydroxyacetone phosphate reductase and related dehydrogenases	chr_1_1:172808-173767	211.114	94.7332	1.15608	9.59e-06	2.27e-05
estExt_GeneWisePlus.C_111144	-	-	chr_1_1:139277-140203	345.408	155.129	1.15483	1.18e-08	3.57e-08
estExt_GeneWisePlus.C_11421	Ubiquitin-conjugating enzymes	KOG0896 Ubiquitin-conjugating enzyme E2	chr_2_2:1883601-1884569	651.196	271.748	1.26082	3.62e-11	1.31e-10
estExt_GeneWisePlus.C_11603	-	-	chr_2_2:1656496-1657453	1188.45	234.231	2.34308	0.000323068	0.00065756
estExt_GeneWisePlus.C_11631	SWIB complex, BAF60b	KOG1946 RNA polymerase I transcription factor UAF	chr_2_2:1621701-1623162	93.1792	37.0006	1.33246	0.0223078	0.0363544
estExt_GeneWisePlus.C_11665	Ras GTPase;GTP-binding nuclear protein Ran;Ras small GTPase, Rho type;Small GTP-binding protein domain;Ras small GTPase, Ras type;Sigma-54 factor, interaction region;Ras small GTPase, Rab type	KOG0087 GTPase Rab11/YPT3, small G protein superfamily	chr_2_2:1577724-1578807	691.01	304.938	1.18019	1.45e-14	6.5e-14
estExt_GeneWisePlus.C_11741	-	-	chr_2_2:1465429-1467411	641.134	223.106	1.5229	6.93e-05	0.000151946
estExt_GeneWisePlus.C_11755	Arp2/3 complex, 34kDa subunit p34-Arc	KOG2826 Actin-related protein Arp2/3 complex, subunit ARPC2	chr_2_2:1448775-1450059	612.608	98.8324	2.63191	1.13e-05	2.66e-05
estExt_GeneWisePlus.C_11769	-	-	chr_2_2:1431363-1432509	43.3361	2.13119	4.34584	0.0167623	0.027927
estExt_GeneWisePlus.C_11774	-	-	chr_2_2:1422095-1423845	88.5849	3.13645	4.81986	2.35e-05	5.33e-05
estExt_GeneWisePlus.C_11817	6-phosphogluconolactonase	KOG3147 6-phosphogluconolactonase - like protein	chr_2_2:1367072-1368024	624.038	239.753	1.38009	1.44e-07	3.99e-07
estExt_GeneWisePlus.C_11838	Cystinosin/ERS1p repeat	KOG3145 Cystine transporter Cystinosin	chr_2_2:1323923-1325039	591.5	71.5319	3.04772	1.04e-10	3.68e-10
estExt_GeneWisePlus.C_11841	H+-transporting two-sector ATPase, delta/epsilon subunit	KOG1758 Mitochondrial F1F0-ATP synthase, subunit delta/ATP16	chr_2_2:1317007-1317992	3553.54	696.282	2.35151	1.08e-10	3.79e-10
estExt_GeneWisePlus.C_11905	-	-	chr_2_2:1209997-1211095	320.09	15.3842	4.37896	4.74e-16	2.3e-15
estExt_GeneWisePlus.C_11994	ARF/SAR superfamily;ADP-ribosylation factor;Small GTP-binding protein domain;GTP-binding protein SAR1	KOG0077 Vesicle coat complex COPII, GTPase subunit SAR1	chr_2_2:1092426-1093639	1135.02	213.126	2.41294	3.55e-05	7.99e-05
estExt_GeneWisePlus.C_12001	Proliferating cell nuclear antigen, PCNA	KOG1636 DNA polymerase delta processivity factor (proliferating cell nuclear antigen)	chr_2_2:1068786-1074793	94.4081	43.5417	1.11651	0.0014652	0.00277111
estExt_GeneWisePlus.C_120123	-	-	chr_3_1:1058959-1060748	589.936	232.187	1.34527	4.12e-08	1.2e-07
estExt_GeneWisePlus.C_12088	GroES-related;Zinc-containing alcohol dehydrogenase superfamily;Zinc-containing alcohol dehydrogenase	KOG0024 Sorbitol dehydrogenase	chr_2_2:976698-978313	4211.85	400.703	3.39385	9.88e-103	3.15e-101
estExt_GeneWisePlus.C_12114	ERG2 and sigma1 receptor-like protein	KOG4143 Sigma receptor and C-8 sterol isomerase	chr_2_2:942733-943739	1019.07	105.759	3.2684	7.12e-23	4.71e-22
estExt_GeneWisePlus.C_12150	Ribosomal protein S8E	KOG3283 40S ribosomal protein S8	chr_2_2:894015-895412	4738.52	960.44	2.30267	5.21e-11	1.87e-10
estExt_GeneWisePlus.C_12707	Peptidase aspartic, active site;Peptidase A1, pepsin	KOG1339 Aspartyl protease	chr_2_2:112794-114371	1602.29	42.5678	5.23423	1.1e-102	3.51e-101
estExt_GeneWisePlus.C_130116	Heat shock protein DnaJ, N-terminal;Plant ascorbate peroxidase;CSL zinc finger;Haem peroxidase, plant/fungal/bacterial	KOG0714 Molecular chaperone (DnaJ superfamily)	chr_6_2:1039136-1041702	1526.02	133.901	3.51054	1.53e-42	1.9e-41
estExt_GeneWisePlus.C_130182	Aldose 1-epimerase	KOG1594 Uncharacterized enzymes related to aldose 1-epimerase	chr_6_2:953644-954966	354.989	130.55	1.44317	0.000451046	0.000895249
estExt_GeneWisePlus.C_130680	Major sperm protein	KOG0439 VAMP-associated protein involved in inositol metabolism	chr_6_2:337591-339118	441.523	148.01	1.57679	0.00351786	0.00634816
estExt_GeneWisePlus.C_130692	YCII-related	-	chr_6_2:328992-329534	539.157	84.1339	2.67995	1.77e-05	4.1e-05
estExt_GeneWisePlus.C_140269	Aminotransferase, class IV;MSF1	KOG3337 Protein similar to predicted member of the intramitochondrial sorting protein family	chr_6_1:1059413-1062190	130.595	54.8285	1.2521	0.00251193	0.00459798
estExt_GeneWisePlus.C_140333	Arginase;Arginase/agmatinase/formiminoglutamase	KOG2964 Arginase family protein	chr_6_1:1135773-1137538	160.084	17.8447	3.16526	0.000370719	0.000750151
estExt_GeneWisePlus.C_140418	-	-	chr_6_1:1248349-1249541	621.252	96.8443	2.68144	2.6e-06	6.5e-06
estExt_GeneWisePlus.C_140520	Myb, DNA-binding;FAD linked oxidase, N-terminal	KOG1262 FAD-binding protein DIMINUTO	chr_6_1:1411596-1413347	78.3783	0.423732	7.53116	4.46e-07	1.18e-06
estExt_GeneWisePlus.C_140568	Glycoside hydrolase, starch-binding;Glucan 1,4-alpha-glucosidase with starch-binding domain;Glycoside hydrolase, family 15	KOG4157 beta-1,6-N-acetylglucosaminyltransferase, contains WSC domain	chr_6_1:1489768-1494949	7633.04	293.319	4.70172	0	0
estExt_GeneWisePlus.C_150064	-	KOG1187 Serine/threonine protein kinase	chr_2_1:97118-99213	964.885	176.111	2.45387	3.68e-05	8.27e-05
estExt_GeneWisePlus.C_150316	-	-	chr_2_1:460620-461649	748.784	61.8957	3.59664	3.42e-23	2.31e-22
estExt_GeneWisePlus.C_150325	Amino acid permease-associated region;Amino acid/polyamine transporter I	KOG1289 Amino acid transporters	chr_2_1:474237-476196	81.8684	36.7489	1.15561	0.00581434	0.0102427
estExt_GeneWisePlus.C_160244	Ribonuclease CAF1	KOG0304 mRNA deadenylase subunit	chr_5_1:320087-322044	134.786	49.4215	1.44746	0.0277743	0.0448926
estExt_GeneWisePlus.C_160257	-	-	chr_5_1:351406-352813	284.496	105.955	1.42496	0.00129134	0.00246825
estExt_GeneWisePlus.C_160555	SKP1 component	KOG1724 SCF ubiquitin ligase, Skp1 component	chr_5_1:745975-747125	1398.01	574.785	1.28228	9.53e-21	5.77e-20
estExt_GeneWisePlus.C_160563	Translation initiation factor IF6	KOG3185 Translation initiation factor 6 (eIF-6)	chr_5_1:764191-765324	141.816	63.4646	1.16	0.000249767	0.000515871
estExt_GeneWisePlus.C_160621	Rhodopsin-like GPCR superfamily;GHMP kinase, ATP-binding region;GHMP kinase;Homoserine kinase	KOG1537 Homoserine kinase	chr_5_1:845216-846589	170.91	76.192	1.16553	6.92e-05	0.000151799
estExt_GeneWisePlus.C_160662	Ribosomal protein L23, N-terminal;Ribosomal L23 protein	KOG1751 60s ribosomal protein L23	chr_5_1:879457-880521	2591.77	1256.77	1.04422	2.68e-72	5.91e-71
estExt_GeneWisePlus.C_170102	Recoverin;Calcium-binding EF-hand	KOG0027 Calmodulin and related proteins (EF-Hand superfamily)	chr_6_2:1760853-1762013	5920.73	918.832	2.6879	1.82e-49	2.61e-48
estExt_GeneWisePlus.C_170127	Glycoside hydrolase, family 31	KOG1065 Maltase glucoamylase and related hydrolases, glycosyl hydrolase family 31	chr_6_2:1712021-1718021	1651.11	241.731	2.77196	1.2e-17	6.32e-17
estExt_GeneWisePlus.C_170261	-	-	chr_6_2:1533949-1534477	1026.66	36.0093	4.83345	1.83e-58	3.2e-57
estExt_GeneWisePlus.C_170411	Inositol phosphatase/fructose-1,6-bisphosphatase	KOG1458 Fructose-1,6-bisphosphatase	chr_6_2:1325285-1326722	558.959	275.342	1.02152	7.19e-18	3.83e-17
estExt_GeneWisePlus.C_170448	Zn-finger, C2H2 type	KOG1721 FOG: Zn-finger	chr_6_2:1271732-1273839	838.567	409.693	1.03338	3.12e-25	2.3e-24
estExt_GeneWisePlus.C_180038	Thiolase;Ribosomal protein S8	KOG1390 Acetyl-CoA acetyltransferase	chr_5_3:633071-634841	646.442	295.015	1.13173	9.13e-16	4.34e-15
estExt_GeneWisePlus.C_180118	-	-	chr_5_3:514070-515413	906.843	162.591	2.47961	2.79e-05	6.29e-05
estExt_GeneWisePlus.C_190016	-	KOG1950 Glycosyl transferase, family 8 - glycogenin	chr_6_1:638557-639959	119.86	47.1267	1.34673	0.00947968	0.0161654
estExt_GeneWisePlus.C_190043	-	-	chr_6_1:611174-612572	891.032	124.808	2.83577	2.67e-11	9.77e-11
estExt_GeneWisePlus.C_190306	Cupin;Cupin region	-	chr_6_1:273399-274911	1459.85	13.6445	6.74136	1.25e-120	4.92e-119
estExt_GeneWisePlus.C_190362	-	KOG4701 Chitinase	chr_6_1:209761-211024	46.4222	2.69246	4.10782	0.00793979	0.0136062
estExt_GeneWisePlus.C_190375	Major facilitator superfamily	KOG0254 Predicted transporter (major facilitator superfamily)	chr_6_1:193561-195148	409.002	1.27265	8.32813	3.22e-37	3.5e-36
estExt_GeneWisePlus.C_20320	Cytochrome oxidase c, subunit VIb	KOG3057 Cytochrome c oxidase, subunit VIb/COX12	chr_4_2:467003-467976	8822.43	1170.5	2.91405	3.24e-114	1.16e-112
estExt_GeneWisePlus.C_20538	Ribose/galactose isomerase	-	chr_4_2:764016-764908	5710.88	301.819	4.24196	1.55e-253	1.46e-251
estExt_GeneWisePlus.C_20546	Acyl-coA-binding protein, ACBP	KOG0817 Acyl-CoA-binding protein	chr_4_2:769617-770434	1743.73	588.494	1.56708	6.49e-09	2e-08
estExt_GeneWisePlus.C_20588	Major facilitator superfamily	KOG2504 Monocarboxylate transporter	chr_4_2:822802-824365	46.9512	0.901035	5.70344	0.000446489	0.000886903
estExt_GeneWisePlus.C_20653	BAR	KOG3725 SH3 domain protein SH3GLB	chr_4_2:906548-907796	1050.67	205.206	2.35616	0.000507768	0.00100625
estExt_GeneWisePlus.C_20793	Legume-like lectin	KOG3839 Lectin VIP36, involved in the transport of glycoproteins carrying high mannose-type glycans	chr_4_2:1107635-1109281	360.009	160.974	1.16121	1.2e-08	3.64e-08
estExt_GeneWisePlus.C_20868	HMG-CoA lyase-like;Esterase/lipase/thioesterase;Batten's disease protein Cln3	KOG2368 Hydroxymethylglutaryl-CoA lyase	chr_4_2:1192578-1202165	40.3462	19.581	1.04298	0.0241809	0.0392988
estExt_GeneWisePlus.C_20948	Histone-fold/TFIID-TAF/NF-Y;Histone H4;Histone core	KOG3467 Histone H4	chr_4_2:1320013-1321027	10961.7	950.609	3.52748	8.57e-301	1.04e-298
estExt_GeneWisePlus.C_20983	Ubiquitin-conjugating enzymes	KOG0427 Ubiquitin conjugating enzyme	chr_4_2:1388870-1389894	792.46	113.761	2.80033	1.39e-09	4.5e-09
estExt_GeneWisePlus.C_210174	Amino acid permease-associated region;Amino acid/polyamine transporter I	KOG1289 Amino acid transporters	chr_3_3:49739-51856	1095.73	118.525	3.20863	8.24e-23	5.43e-22
estExt_GeneWisePlus.C_210177	-	-	chr_3_3:46733-48253	727.644	95.2074	2.93409	6.4e-11	2.27e-10
estExt_GeneWisePlus.C_21083	Ribosomal protein S11	KOG0407 40S ribosomal protein S14	chr_4_2:1530984-1531973	3095.94	718.834	2.10665	0.0281056	0.0454208
estExt_GeneWisePlus.C_21125	Ribosomal protein S7E	KOG3320 40S ribosomal protein S7	chr_4_2:1588352-1589733	1528.19	572.398	1.41673	1.67e-14	7.47e-14
estExt_GeneWisePlus.C_21165	VanZ like protein	-	chr_4_2:1660749-1661532	377.492	156.78	1.2677	6.6e-07	1.74e-06
estExt_GeneWisePlus.C_21234	Ribosomal protein S27a;Cytochrome c heme-binding site;Ubiquitin	KOG0004 Ubiquitin/40S ribosomal protein S27a fusion	chr_4_2:1771764-1774247	3048.73	679.539	2.16558	0.00182091	0.00337294
estExt_GeneWisePlus.C_21251	Transthyretin	KOG3006 Transthyretin and related proteins	chr_4_2:1793623-1794051	443.847	78.6746	2.49609	0.0027426	0.00499569
estExt_GeneWisePlus.C_21307	HMG1/2 (high mobility group) box;High mobility group proteins HMG1 and HMG2	KOG0381 HMG box-containing protein	chr_4_2:1864857-1866294	3573.77	1419.56	1.332	5.89e-43	7.4e-42
estExt_GeneWisePlus.C_21447	-	-	chr_4_2:2044697-2045347	149.858	16.1482	3.21415	0.000693114	0.00135462
estExt_GeneWisePlus.C_21485	HAD-superfamily subfamily IIA hydrolase, CECR5;HAD-superfamily hydrolase, subfamily IIA	KOG1618 Predicted phosphatase	chr_4_2:2084141-2086198	565.252	260.182	1.11937	2.36e-14	1.05e-13
estExt_GeneWisePlus.C_21505	Zinc-containing alcohol dehydrogenase superfamily	KOG1198 Zinc-binding oxidoreductase	chr_4_2:2122675-2123723	219.812	1.85723	6.88697	4.23e-19	2.39e-18
estExt_GeneWisePlus.C_21776	Cytochrome c oxidase, subunit Va	KOG4077 Cytochrome c oxidase, subunit Va/COX6	chr_4_2:2548521-2549769	4824.62	914.012	2.40013	4.29e-17	2.21e-16
estExt_GeneWisePlus.C_21855	Glycogen synthase	KOG3742 Glycogen synthase	chr_4_2:2675510-2678783	48.8828	23.6478	1.04762	0.0123797	0.0208739
estExt_GeneWisePlus.C_220001	-	-	chr_6_4:1065-1524	741.657	12.0487	5.9438	5.33e-55	8.64e-54
estExt_GeneWisePlus.C_22004	Glycoside hydrolase, clan GH-D;Glycoside hydrolase, family 27	KOG2366 Alpha-D-galactosidase (melibiase)	chr_4_2:2868998-2872567	618.922	1.0954	9.14216	2.13e-57	3.66e-56
estExt_GeneWisePlus.C_22113	-	KOG2895 Uncharacterized conserved protein	chr_4_2:3013574-3015575	87.5401	38.3497	1.19073	0.00548956	0.00969091
estExt_GeneWisePlus.C_22131	-	-	chr_4_2:3047067-3048209	205.169	74.8288	1.45515	0.0093055	0.0158737
estExt_GeneWisePlus.C_22143	Inorganic pyrophosphatase;Bacterial/Archaeal inorganic pyrophosphatase	KOG1626 Inorganic pyrophosphatase/Nucleosome remodeling factor, subunit NURF38	chr_4_2:3057017-3058288	405.266	200.68	1.01397	1.42e-13	6.04e-13
estExt_GeneWisePlus.C_22156	-	-	chr_4_2:3067360-3068231	239.221	114.266	1.06595	9.75e-08	2.73e-07
estExt_GeneWisePlus.C_22306	Peptidase M, neutral zinc metallopeptidases, zinc-binding site	-	chr_4_2:3281999-3283072	336.888	62.0263	2.44132	0.0249852	0.0405015
estExt_GeneWisePlus.C_22332	Major intrinsic protein	KOG0224 Aquaporin (major intrinsic protein family)	chr_4_2:3318384-3319352	158.809	67.9148	1.22549	0.000502015	0.00099504
estExt_GeneWisePlus.C_240054	-	-	chr_4_3:78026-78867	28038	2202.99	3.66985	0	0
estExt_GeneWisePlus.C_240077	Sodium/calcium exchanger membrane region;Calcium/proton exchanger	KOG1397 Ca2+/H+ antiporter VCX1 and related proteins	chr_4_3:104413-105731	651.049	81.9585	2.9898	7.24e-11	2.56e-10
estExt_GeneWisePlus.C_30423	-	-	chr_8_2:2665085-2666692	68.051	30.7269	1.14711	0.0121758	0.0205439
estExt_GeneWisePlus.C_30516	-	KOG2865 NADH:ubiquinone oxidoreductase, NDUFA9/39kDa subunit	chr_8_2:2572878-2574558	1260.1	216.865	2.53867	2.98e-08	8.74e-08
estExt_GeneWisePlus.C_30647	Uracil-DNA glycosylase superfamily	KOG4120 G/T mismatch-specific thymine DNA glycosylase	chr_8_2:2400758-2403435	389.62	34.8011	3.48486	1.27e-11	4.79e-11
estExt_GeneWisePlus.C_30676	BTB/POZ	KOG4350 Uncharacterized conserved protein, contains BTB/POZ domain	chr_8_2:2343229-2344345	335.383	128.923	1.3793	0.000133079	0.000281146
estExt_GeneWisePlus.C_30965	Esterase/lipase/thioesterase	-	chr_8_2:1915038-1916321	118.074	53.791	1.13425	0.000628114	0.00123622
estExt_GeneWisePlus.C_30988	Hydroxyacid dehydrogenase/reductase	KOG0409 Predicted dehydrogenase	chr_8_2:1893097-1894660	38.8033	18.8243	1.04358	0.0223618	0.0364365
estExt_GeneWisePlus.C_31117	Clathrin adaptor complex, small chain	KOG0935 Clathrin adaptor complex, small subunit	chr_8_2:1720527-1721511	575.281	83.8081	2.77911	4.33e-07	1.15e-06
estExt_GeneWisePlus.C_31166	Histone-fold/TFIID-TAF/NF-Y;Histone H4;Histone core	KOG3467 Histone H4	chr_8_2:1661853-1662755	10899.2	2022.58	2.42995	1.4e-41	1.69e-40
estExt_GeneWisePlus.C_31598	Glycine cleavage H-protein;2-oxo acid dehydrogenase, lipoyl-binding site	KOG3373 Glycine cleavage system H protein (lipoate-binding)	chr_8_2:1069972-1070958	626.914	112.977	2.47224	0.000591772	0.00116789
estExt_GeneWisePlus.C_31675	Surfeit locus 4;Surfeit locus 4-related	KOG3998 Putative cargo transport protein ERV29	chr_8_2:950301-951958	492.257	56.1425	3.13225	5.77e-10	1.92e-09
estExt_GeneWisePlus.C_31727	Zinc-containing alcohol dehydrogenase superfamily	KOG1198 Zinc-binding oxidoreductase	chr_8_2:891965-893151	35.8054	1.92495	4.21728	0.0154247	0.0257625
estExt_GeneWisePlus.C_31742	Ras GTPase;ARF/SAR superfamily;ADP-ribosylation factor;Small GTP-binding protein domain;GTP-binding protein SAR1;Ras small GTPase, Rab type	KOG0070 GTP-binding ADP-ribosylation factor Arf1	chr_8_2:879794-881160	3523.46	1541.18	1.19296	1.83e-65	3.7e-64
estExt_GeneWisePlus.C_31762	-	-	chr_8_2:851506-852478	333.24	50.6149	2.71893	0.000374326	0.000756994
estExt_GeneWisePlus.C_31878	Adenylylsulfate kinase	KOG0635 Adenosine 5'-phosphosulfate kinase	chr_8_2:696368-697307	484.564	93.4998	2.37365	0.0150476	0.0251744
estExt_GeneWisePlus.C_31890	Ubiquitin	KOG1769 Ubiquitin-like proteins	chr_8_2:689827-690447	1816.27	671.422	1.43569	8.25e-16	3.96e-15
estExt_GeneWisePlus.C_32010	Mpv17/PMP22	KOG1944 Peroxisomal membrane protein MPV17 and related proteins	chr_8_2:505069-506406	536.288	168.117	1.67354	0.0169724	0.0282678
estExt_GeneWisePlus.C_32049	Glycoside hydrolase, family 5	-	chr_8_2:435567-436621	410.868	34.3866	3.57876	7.86e-13	3.18e-12
estExt_GeneWisePlus.C_32162	Basic helix-loop-helix dimerisation region bHLH	KOG1318 Helix loop helix transcription factor EB	chr_8_2:301853-303764	333.471	145.107	1.20044	1.48e-07	4.11e-07
estExt_GeneWisePlus.C_32244	Ribosomal protein S12/S23;Ribosomal protein S23, eukaryotic and archaeal form	KOG1749 40S ribosomal protein S23	chr_8_2:194283-195418	5927.47	2039	1.53955	2.18e-30	1.93e-29
estExt_GeneWisePlus.C_32268	Mov34/MPN/PAD-1;Mov34-1	KOG2975 Translation initiation factor 3, subunit f (eIF-3f)	chr_8_2:177938-179130	131.315	58.7492	1.16039	0.000571081	0.00112794
estExt_GeneWisePlus.C_32341	Phospholipid methyltransferase	KOG4142 Phospholipid methyltransferase	chr_8_2:101658-102833	401.596	142.969	1.49004	0.000773774	0.00150701
estExt_GeneWisePlus.C_40313	-	-	chr_7_1:444931-445783	10936.6	311.811	5.13235	0	0
estExt_GeneWisePlus.C_40398	Mitochondrial import inner membrane translocase, subunit Tim17/22	KOG1652 Mitochondrial import inner membrane translocase, subunit TIM17	chr_7_1:574848-575856	1873.91	558.714	1.74587	0.00113552	0.00217826
estExt_GeneWisePlus.C_40484	Mitochondrial substrate carrier;Adenine nucleotide translocator 1;Mitochondrial carrier protein	KOG0759 Mitochondrial oxoglutarate/malate carrier proteins	chr_7_1:677133-678636	111.116	5.64541	4.29884	5.16e-06	1.25e-05
estExt_GeneWisePlus.C_40792	Permease for cytosine/purines, uracil, thiamine, allantoin	KOG2466 Uridine permease/thiamine transporter/allantoin transport	chr_7_1:1154267-1156044	142.387	53.6043	1.4094	0.0164221	0.0273965
estExt_GeneWisePlus.C_40875	Membrane bound O-acyl transferase, MBOAT	KOG3860 Acyltransferase required for palmitoylation of Hedgehog (Hh) family of secreted signaling proteins	chr_7_1:1265865-1267927	219.089	28.0937	2.9632	0.000486182	0.000964038
estExt_GeneWisePlus.C_41472	-	-	chr_7_1:2181767-2182661	73.3941	8.28855	3.14647	0.0291539	0.0460871
estExt_GeneWisePlus.C_41706	Ras GTPase;Ras small GTPase, Rho type;Small GTP-binding protein domain;Ras small GTPase, Ras type;Ras small GTPase, Rab type	KOG0393 Ras-related small GTPase, Rho type	chr_7_1:2477709-2478675	296.938	137.618	1.10949	2.23e-08	6.6e-08
estExt_GeneWisePlus.C_41739	Cytochrome c oxidase, subunit VIa	KOG3469 Cytochrome c oxidase, subunit VIa/COX13	chr_7_1:2519735-2520653	7084.41	1565.78	2.17777	3.38e-07	9.03e-07
estExt_GeneWisePlus.C_41881	DEXDc2;Ribosomal protein L15;ATP-dependent helicase, DEAH-box;Xeroderma pigmentosum group D protein;Helicase c2;DEAD_2	KOG1133 Helicase of the DEAD superfamily	chr_7_1:2722741-2727309	261.162	106.561	1.29327	7.21e-05	0.000157525
estExt_GeneWisePlus.C_41918	-	-	chr_7_1:2768200-2768855	472.02	206.356	1.19371	4.32e-10	1.46e-09
estExt_GeneWisePlus.C_41952	Histone-fold/TFIID-TAF/NF-Y;Histone H2B;Histone core	KOG1744 Histone H2B	chr_7_1:2794057-2794999	14586.5	4418.75	1.72292	1.1e-23	7.66e-23
estExt_GeneWisePlus.C_50032	Aldo/keto reductase	KOG1577 Aldo/keto reductase family proteins	chr_4_1:2412489-2413576	74.7204	35.121	1.08917	0.00287709	0.00522932
estExt_GeneWisePlus.C_50038	-	-	chr_4_1:2408044-2409216	564.35	68.8612	3.03483	3.69e-10	1.25e-09
estExt_GeneWisePlus.C_50060	Oxidoreductase, C-terminal;Oxidoreductase, N-terminal	KOG2741 Dimeric dihydrodiol dehydrogenase	chr_4_1:2370850-2372329	100.85	44.0776	1.19409	0.00265392	0.00483941
estExt_GeneWisePlus.C_50070	Light chain 3 (LC3)	KOG1654 Microtubule-associated anchor protein involved in autophagy and membrane trafficking	chr_4_1:2358869-2360003	9002.47	2436.85	1.8853	0.00690843	0.0120835
estExt_GeneWisePlus.C_50073	Mitochondrial substrate carrier	KOG0750 Mitochondrial solute carrier protein	chr_4_1:2356753-2358529	500.491	247.871	1.01375	2.1e-16	1.04e-15
estExt_GeneWisePlus.C_50253	Cornichon	KOG2729 ER vesicle integral membrane protein involved in establishing cell polarity, signaling and protein degradation	chr_4_1:2127440-2128414	1158.55	214.661	2.43219	1.25e-05	2.93e-05
estExt_GeneWisePlus.C_50326	Ribosomal protein S17	KOG1728 40S ribosomal protein S11	chr_4_1:2020927-2022178	1779.93	757.085	1.23329	3.1e-30	2.72e-29
estExt_GeneWisePlus.C_50364	Protein of unknown function DUF52	KOG3086 Predicted dioxygenase	chr_4_1:1953957-1955291	65.1669	29.1419	1.16104	0.0106972	0.0182014
estExt_GeneWisePlus.C_50547	Alkaline phosphatase	KOG4126 Alkaline phosphatase	chr_4_1:1689484-1691384	117.272	53.7282	1.12611	0.000585173	0.00115532
estExt_GeneWisePlus.C_50561	Ribosomal protein L34e	KOG1790 60s ribosomal protein L34	chr_4_1:1660317-1661691	3641.67	675.962	2.42959	7.53e-15	3.45e-14
estExt_GeneWisePlus.C_50567	Myb, DNA-binding	-	chr_4_1:1647619-1649718	280.949	122.274	1.20019	1.23e-06	3.14e-06
estExt_GeneWisePlus.C_50637	Heat shock protein DnaJ, N-terminal;Protein of unknown function UPF0108	KOG0723 Molecular chaperone (DnaJ superfamily)	chr_4_1:1560189-1561014	2774.47	445.299	2.63937	2.61e-21	1.6e-20
estExt_GeneWisePlus.C_50667	Ribosomal protein S10;Ribosomal protein S10, eukaryotic and archaeal form	KOG0900 40S ribosomal protein S20	chr_4_1:1516583-1517502	3033.68	455.561	2.73535	7.73e-29	6.41e-28
estExt_GeneWisePlus.C_50744	Glucose-methanol-choline oxidoreductase;GMC oxidoreductase	KOG1238 Glucose dehydrogenase/choline dehydrogenase/mandelonitrile lyase (GMC oxidoreductase family)	chr_4_1:1411492-1413551	106.24	2.19961	5.59394	8.47e-08	2.38e-07
estExt_GeneWisePlus.C_50873	O-methyltransferase, family 2;Generic methyltransferase	KOG3178 Hydroxyindole-O-methyltransferase and related SAM-dependent methyltransferases	chr_4_1:1247972-1249338	130.825	54.5385	1.26229	0.00251193	0.00459798
estExt_GeneWisePlus.C_50883	Generic methyltransferase	-	chr_4_1:1237325-1238317	1050.35	130.655	3.00704	4.12e-17	2.12e-16
estExt_GeneWisePlus.C_51010	-	-	chr_4_1:1038839-1040106	12525.7	454.54	4.78434	0	0
estExt_GeneWisePlus.C_51049	Acyl-CoA dehydrogenase, C-terminal;Acyl-CoA dehydrogenase, N-terminal;Acyl-CoA dehydrogenase;Acyl-CoA dehydrogenase, central region	KOG0141 Isovaleryl-CoA dehydrogenase	chr_4_1:962854-964530	147.532	63.0545	1.22636	0.000597576	0.00117911
estExt_GeneWisePlus.C_51069	-	-	chr_4_1:945061-945941	906.208	177.356	2.35319	0.00131551	0.00251349
estExt_GeneWisePlus.C_51419	Amidohydrolase 2	KOG4245 Predicted metal-dependent hydrolase of the TIM-barrel fold	chr_4_1:430391-431531	33.1448	1.32354	4.64631	0.0225549	0.0367333
estExt_GeneWisePlus.C_60011	Purine nucleoside phosphorylase I, inosine and guanosine-specific;Purine phosphorylase, family 2;Inosine guanosine and xanthosine phosphorylase	KOG3984 Purine nucleoside phosphorylase	chr_3_4:9285-10885	287.068	117.048	1.29429	2.49e-05	5.65e-05
estExt_GeneWisePlus.C_60067	Porin, eukaryotic type	KOG3296 Translocase of outer mitochondrial membrane complex, subunit TOM40	chr_3_4:74946-76451	388.349	162.374	1.25803	2.46e-07	6.68e-07
estExt_GeneWisePlus.C_60198	Der1-like	KOG0858 Predicted membrane protein	chr_3_4:200710-201625	51.9402	22.8581	1.18415	0.0308194	0.0486131
estExt_GeneWisePlus.C_60280	Acireductone dioxygenase, ARD;Cupin region	KOG2107 Uncharacterized conserved protein, contains double-stranded beta-helix domain	chr_3_4:284893-285654	878.159	276.481	1.6673	0.00237387	0.00435476
estExt_GeneWisePlus.C_60513	Protein of unknown function DUF341	KOG2551 Phospholipase/carboxyhydrolase	chr_3_4:595109-596022	374.645	3.39858	6.78445	2.55e-31	2.3e-30
estExt_GeneWisePlus.C_61026	H+-transporting two-sector ATPase, C subunit;Vacuolar H+-transporting two-sector ATPase, C subunit	KOG0233 Vacuolar H+-ATPase V0 sector, subunit c''	chr_3_4:1363809-1364741	1678.27	212.681	2.98021	2.01e-25	1.5e-24
estExt_GeneWisePlus.C_61129	Peptidase aspartic, active site;Peptidase A1, pepsin	KOG1339 Aspartyl protease	chr_3_4:1494624-1496320	605.439	97.3427	2.63684	1.52e-05	3.55e-05
estExt_GeneWisePlus.C_61283	Cyanate lyase, C-terminal;Cyanase	-	chr_3_4:1712703-1713587	307.342	16.3351	4.2338	1.59e-14	7.13e-14
estExt_GeneWisePlus.C_70216	RNA-binding region RNP-1 (RNA recognition motif)	-	chr_5_2:1447309-1448397	3331.37	745.577	2.15969	0.00149098	0.00281776
estExt_GeneWisePlus.C_70328	Cystinosin/ERS1p repeat	-	chr_5_2:1324371-1325510	158.501	19.0894	3.05365	0.00152834	0.00288512
estExt_GeneWisePlus.C_70797	-	KOG3300 NADH:ubiquinone oxidoreductase, B16.6 subunit/cell death-regulatory protein	chr_5_2:494391-495296	2223.15	277.771	3.00064	2.52e-34	2.52e-33
estExt_GeneWisePlus.C_70845	Lipase 3, N-terminal;Lipase, active site;Lipase, class 3	KOG4569 Predicted lipase	chr_5_2:431727-432834	1209.8	1.50272	9.65298	3.08e-115	1.11e-113
estExt_GeneWisePlus.C_70992	Amino acid permease-associated region;Amino acid/polyamine transporter I	KOG1289 Amino acid transporters	chr_5_2:244734-246619	139.341	0.157409	9.78989	9.09e-13	3.66e-12
estExt_GeneWisePlus.C_71036	ThiJ/PfpI	-	chr_5_2:194105-195009	674.775	57.4238	3.55469	4.58e-20	2.69e-19
estExt_GeneWisePlus.C_71037	Alkyl hydroperoxide reductase/ Thiol specific antioxidant/ Mal allergen	KOG0541 Alkyl hydroperoxide reductase/peroxiredoxin	chr_5_2:191961-193018	1437.99	110.457	3.7025	1.07e-46	1.47e-45
estExt_GeneWisePlus.C_71047	-	KOG1203 Predicted dehydrogenase	chr_5_2:181327-182226	53.7579	3.42822	3.97095	0.00832774	0.0142541
estExt_GeneWisePlus.C_800003	Elongation factor Tu, domain 2;Elongation factor Tu, C-terminal;Protein synthesis factor, GTP-binding;Translation elongation factor EF-1, alpha subunit	KOG0052 Translation elongation factor EF-1 alpha/Tu	chr_8_1:1153264-1155058	1059.85	1e-05	26.6593	1.53e-102	4.84e-101
estExt_GeneWisePlus.C_80085	Ribosomal protein L13e	KOG3295 60S Ribosomal protein L13	chr_1_2:100063-101368	2070.42	625.128	1.7277	0.000203322	0.000422804
estExt_GeneWisePlus.C_80115	-	-	chr_1_2:150549-151508	2380.2	701.835	1.76188	0.000713259	0.00139237
estExt_GeneWisePlus.C_80192	AAA-protein subdomain;AAA ATPase, central region;AAA ATPase	KOG0737 AAA+-type ATPase	chr_1_2:247973-249551	98.8636	42.5244	1.21715	0.00462051	0.00826098
estExt_GeneWisePlus.C_80365	-	-	chr_1_2:467655-468273	2272.51	256.028	3.14991	1.13e-42	1.41e-41
estExt_GeneWisePlus.C_80523	Glycoside hydrolase, family 12	-	chr_1_2:697335-698497	85.9591	4.34206	4.3072	0.000120956	0.000256665
estExt_GeneWisePlus.C_80606	Got1-like protein	KOG1743 Ferric reductase-like proteins	chr_1_2:813753-814774	210.777	32.363	2.7033	0.00838164	0.014339
estExt_GeneWisePlus.C_80797	Cytochrome c oxidase subunit IV	KOG4075 Cytochrome c oxidase, subunit IV/COX5b	chr_1_2:1040991-1042125	3179.71	1295.29	1.29562	2.26e-43	2.86e-42
estExt_GeneWisePlus.C_90939	DNA-directed RNA polymerase, M/15 kDa subunit;Transcription factor TFIIS;Cytochrome c heme-binding site	KOG2691 RNA polymerase II subunit 9	chr_3_2:368817-369690	286.404	100.643	1.5088	0.00651012	0.0114364
estExt_GeneWisePlus.C_91130	Ras GTPase;ATP/GTP-binding site motif A (P-loop)	KOG0090 Signal recognition particle receptor, beta subunit (small G protein superfamily)	chr_3_2:57857-59229	1169.46	246.898	2.24386	0.00741331	0.0127539
estExt_Genewise1.C_100562	KH, type 2;Ribosomal protein S3, C-terminal;Eukaryotic/archaeal ribosomal protein S3	KOG3181 40S ribosomal protein S3	chr_8_1:760414-762248	1321.29	529.082	1.32038	1.39e-17	7.29e-17
estExt_Genewise1.C_100722	Ribosomal protein S19e	KOG3411 40S ribosomal protein S19	chr_8_1:992456-993980	1950.35	637.637	1.61293	7.24e-08	2.04e-07
estExt_Genewise1.C_101042	Ribosomal protein 60S	KOG1762 60s acidic ribosomal protein P1	chr_8_1:1362290-1363576	4305.2	1303.34	1.72387	5.47e-08	1.57e-07
estExt_Genewise1.C_101080	Short-chain dehydrogenase/reductase SDR;Glucose/ribitol dehydrogenase	KOG0725 Reductases with broad range of substrate specificities	chr_8_1:1410028-1411275	280.209	44.1176	2.66708	0.00298723	0.00541973
estExt_Genewise1.C_101103	-	-	chr_8_1:1447804-1448645	5231.21	1218.59	2.10193	0.00553955	0.00977403
estExt_Genewise1.C_101244	Small nuclear ribonucleoprotein (Sm protein);snRNP	KOG1783 Small nuclear ribonucleoprotein F	chr_8_1:1593408-1593840	5569.56	685.446	3.02245	3.13e-86	8.03e-85
estExt_Genewise1.C_10562	Fibrillarin	KOG1596 Fibrillarin and related nucleolar RNA-binding proteins	chr_2_2:3023394-3025108	568.414	197.057	1.52833	0.000224359	0.000464632
estExt_Genewise1.C_10789	Mitochondrial ATP synthase g subunit	KOG4103 Mitochondrial F1F0-ATP synthase, subunit g/ATP20	chr_2_2:2715268-2716330	2773.43	445.273	2.63891	2.59e-21	1.59e-20
estExt_Genewise1.C_10831	S25 ribosomal protein	KOG1767 40S ribosomal protein S25	chr_2_2:2675495-2676353	8708.79	3265.57	1.41514	2.85e-75	6.43e-74
estExt_Genewise1.C_10874	-	-	chr_2_2:2619888-2621408	76.2812	36.3298	1.07017	0.00225428	0.0041399
estExt_Genewise1.C_10961	-	-	chr_2_2:2487496-2488102	7437.03	647.797	3.52111	1.98e-203	1.44e-201
estExt_Genewise1.C_110356	-	KOG4157 beta-1,6-N-acetylglucosaminyltransferase, contains WSC domain	chr_1_1:1190747-1192507	1703.18	128.079	3.73313	3.32e-56	5.5e-55
estExt_Genewise1.C_11071	Isocitrate lyase and phosphorylmutase;Isocitrate lyase	KOG1260 Isocitrate lyase	chr_2_2:2357468-2359547	133.182	63.9084	1.05932	6.27e-05	0.00013779
estExt_Genewise1.C_111106	-	-	chr_1_1:185162-186094	1194.32	548.573	1.12243	4.3e-28	3.52e-27
estExt_Genewise1.C_11500	Aldo/keto reductase	KOG1577 Aldo/keto reductase family proteins	chr_2_2:1799323-1800571	731.348	255.593	1.51671	1.87e-05	4.3e-05
estExt_Genewise1.C_11928	GCN5-related N-acetyltransferase	KOG3234 Acetyltransferase, (GNAT) family	chr_2_2:1172005-1172847	126.793	46.1945	1.45668	0.0301612	0.0475899
estExt_Genewise1.C_11965	Ribosomal protein L10;Ribosomal protein 60S	KOG0815 60S acidic ribosomal protein P0	chr_2_2:1134932-1136163	1534.5	611.799	1.32664	1.04e-19	6.03e-19
estExt_Genewise1.C_120094	Ribosomal protein S24e	KOG3424 40S ribosomal protein S24	chr_3_1:1093433-1094756	2400.09	405.381	2.56574	1.78e-15	8.36e-15
estExt_Genewise1.C_120314	RPEL repeat	KOG4339 RPEL repeat-containing protein	chr_3_1:803422-804211	2054.78	595.21	1.78751	0.00544873	0.00962221
estExt_Genewise1.C_120692	Acyltransferase 3	-	chr_3_1:171866-173285	220.61	15.3028	3.84963	9.47e-09	2.89e-08
estExt_Genewise1.C_120789	-	-	chr_3_1:68692-70764	232.198	38.5213	2.59163	0.0155385	0.0259439
estExt_Genewise1.C_12096	Ribosomal protein L15e	KOG1678 60s ribosomal protein L15	chr_2_2:968932-970204	3591.27	817.818	2.13464	0.00414205	0.00744386
estExt_Genewise1.C_12317	RNA polymerase Rpb8	KOG3400 RNA polymerase subunit 8	chr_2_2:664966-665528	124.461	56.3879	1.14224	0.000423855	0.00084645
estExt_Genewise1.C_130386	Hypoxia induced protein conserved region	KOG4431 Uncharacterized protein, induced by hypoxia	chr_6_2:676479-677373	588.515	106.633	2.46443	0.00111974	0.00214841
estExt_Genewise1.C_130471	Protein of unknown function UPF0041	KOG1590 Uncharacterized conserved protein	chr_6_2:585341-586600	2271.44	216.286	3.3926	7.81e-56	1.29e-54
estExt_Genewise1.C_130476	-	-	chr_6_2:580753-581834	228.446	8.17369	4.80472	1.77e-13	7.46e-13
estExt_Genewise1.C_130562	GOLD;emp24/gp25L/p24	KOG1690 emp24/gp25L/p24 family of membrane trafficking proteins	chr_6_2:476032-477002	1103.23	186.946	2.56104	9.08e-08	2.55e-07
estExt_Genewise1.C_130704	Cytochrome bd ubiquinol oxidase, 14 kDa subunit	KOG3440 Ubiquinol cytochrome c reductase, subunit QCR7	chr_6_2:306452-307610	2966.67	676.224	2.13327	0.0105877	0.0180212
estExt_Genewise1.C_140131	Single-strand binding protein/Primosomal replication protein n	-	chr_6_1:857024-857877	893.904	147.744	2.59702	4.21e-07	1.12e-06
estExt_Genewise1.C_140182	SecY protein	KOG1373 Transport protein Sec61, alpha subunit	chr_6_1:946669-948637	1744.17	217.34	3.00452	2.67e-27	2.13e-26
estExt_Genewise1.C_140509	-	-	chr_6_1:1382851-1384678	558.618	220.788	1.3392	8.08e-08	2.27e-07
estExt_Genewise1.C_160103	-	-	chr_5_1:148879-150736	230.795	2.12782	6.76109	5.09e-19	2.87e-18
estExt_Genewise1.C_160252	-	KOG1124 FOG: TPR repeat	chr_5_1:337942-338695	266.019	89.8546	1.56587	0.0249796	0.0404989
estExt_Genewise1.C_160432	NADH:ubiquinone oxidoreductase 17.2 kD subunit	KOG3382 NADH:ubiquinone oxidoreductase, B17.2 subunit	chr_5_1:585197-586078	2139.62	293.766	2.86462	1.39e-26	1.08e-25
estExt_Genewise1.C_160692	-	-	chr_5_1:909124-909559	19430.9	3194.6	2.60465	1.54e-128	6.79e-127
estExt_Genewise1.C_170028	Ribosomal protein L7/L12	KOG1715 Mitochondrial/chloroplast ribosomal protein L12	chr_6_2:1827409-1828304	368.264	155.452	1.24427	2.91e-07	7.84e-07
estExt_Genewise1.C_170059	-	-	chr_6_2:1797383-1798124	10336.6	2117.14	2.28757	1.52e-20	9.04e-20
estExt_Genewise1.C_170156	Small nuclear ribonucleoprotein (Sm protein);snRNP	KOG3172 Small nuclear ribonucleoprotein Sm D3	chr_6_2:1665352-1666135	1328.45	145.527	3.19039	8.26e-27	6.48e-26
estExt_Genewise1.C_170305	Phosphoribosyl pyrophosphate synthetase;Ribose-phosphate pyrophosphokinase;Phosphoribosyltransferase	KOG1448 Ribose-phosphate pyrophosphokinase	chr_6_2:1483227-1484538	283.649	94.9866	1.57831	0.0251193	0.0407057
estExt_Genewise1.C_190018	Thioredoxin domain 2;Thioredoxin-related	KOG0907 Thioredoxin	chr_6_1:637346-638098	278.409	103.807	1.4233	0.00116691	0.00223763
estExt_Genewise1.C_190063	-	-	chr_6_1:591663-592880	1325.75	205.806	2.68745	3.61e-12	1.41e-11
estExt_Genewise1.C_20347	Cytochrome c, class IA/ IB;Cytochrome c, class I;Cytochrome c heme-binding site	KOG3453 Cytochrome c	chr_4_2:495115-496437	6078.86	2880.31	1.07758	1.6e-153	8.56e-152
estExt_Genewise1.C_20511	Retrieval of early ER protein Rer1	KOG1688 Golgi proteins involved in ER retention (RER)	chr_4_2:734778-735732	1039.55	142.96	2.86228	1.23e-13	5.23e-13
estExt_Genewise1.C_20571	Mitochondrial 39-S ribosomal L47	KOG3331 Mitochondrial/chloroplast ribosomal protein L4/L29	chr_4_2:794601-795594	753.436	155.894	2.27292	0.0186996	0.0307328
estExt_Genewise1.C_20591	-	-	chr_4_2:824553-825397	478.056	211.919	1.17367	1.26e-10	4.41e-10
estExt_Genewise1.C_21065	Ribosomal protein S9	KOG1753 40S ribosomal protein S16	chr_4_2:1509450-1511059	2061.73	444.061	2.21503	0.00146769	0.00277479
estExt_Genewise1.C_21474	Ribosomal L22e protein	KOG3434 60S ribosomal protein L22	chr_4_2:2077241-2077966	2253.43	479.917	2.23127	0.000356364	0.000721394
estExt_Genewise1.C_21491	H+-transporting two-sector ATPase, C subunit;Vacuolar H+-transporting two-sector ATPase, C subunit eukaryotic;Vacuolar H+-transporting two-sector ATPase, C subunit	KOG0232 Vacuolar H+-ATPase V0 sector, subunits c/c'	chr_4_2:2095123-2096356	3675.71	743.738	2.30516	5.74e-09	1.77e-08
estExt_Genewise1.C_21739	Amino acid permease-associated region;Amino acid/polyamine transporter I	KOG1289 Amino acid transporters	chr_4_2:2471052-2472886	81.0117	33.5407	1.27222	0.0203825	0.0334385
estExt_Genewise1.C_21905	Glycoside hydrolase, family 43	-	chr_4_2:2728700-2730074	1295.74	19.5388	6.05129	6.44e-98	1.93e-96
estExt_Genewise1.C_22007	-	-	chr_4_2:2868998-2872567	195.125	16.5686	3.55788	1.35e-06	3.43e-06
estExt_Genewise1.C_22013	-	-	chr_4_2:2874953-2875892	245.086	15.2023	4.01093	1.52e-10	5.29e-10
estExt_Genewise1.C_22523	High mobility group-like nuclear protein;Ribosomal protein L7AE;Ribosomal protein HS6;Ribosomal protein L7Ae/L30e/S12e/Gadd45	KOG3387 60S ribosomal protein 15.5kD/SNU13, NHP2/L7A family (includes ribonuclease P subunit p38), involved in splicing	chr_4_2:3603592-3604391	1370.88	193.2	2.82694	2.78e-16	1.36e-15
estExt_Genewise1.C_30628	Sterol-binding	KOG4170 2-enoyl-CoA hydratase/3-hydroxyacyl-CoA dehydrogenase/Peroxisomal 3-ketoacyl-CoA-thiolase, sterol-binding domain and related enzymes	chr_8_2:2422350-2423011	2288.72	203.001	3.49498	6.37e-62	1.2e-60
estExt_Genewise1.C_31600	Ribosomal protein S6	KOG4708 Mitochondrial ribosomal protein MRP17	chr_8_2:1068966-1069696	1069.01	178.366	2.58336	6.7e-08	1.92e-07
estExt_Genewise1.C_31655	Mitochondrial import translocase, subunit Tom22	KOG4111 Translocase of outer mitochondrial membrane complex, subunit TOM22	chr_8_2:977427-978543	867.858	325.499	1.41481	6.13e-09	1.89e-08
estExt_Genewise1.C_31686	Ribosomal protein L1	KOG1570 60S ribosomal protein L10A	chr_8_2:939869-940951	7541.07	1657.05	2.18615	4.61e-08	1.34e-07
estExt_Genewise1.C_31764	GOLD;emp24/gp25L/p24	KOG1692 Putative cargo transport protein EMP24 (p24 protein family)	chr_8_2:849178-850349	1236.66	142.966	3.1127	6.43e-23	4.27e-22
estExt_Genewise1.C_31783	Elongation factor 1, beta/beta'/delta chain	KOG1668 Elongation factor 1 beta/delta chain	chr_8_2:811716-813058	2427.66	817.101	1.57098	1.2e-11	4.54e-11
estExt_Genewise1.C_31964	Ribosomal protein L29	KOG3436 60S ribosomal protein L35	chr_8_2:583264-584492	4312.37	797.691	2.43458	1.14e-17	6.02e-17
estExt_Genewise1.C_32328	Ribosomal protein L6, signature 2;Ribosomal protein L6	KOG3255 60S ribosomal protein L9	chr_8_2:118145-119631	3141.62	1245.47	1.33482	1.47e-37	1.62e-36
estExt_Genewise1.C_32387	Heavy metal binding;Heavy metal transport/detoxification protein	KOG1603 Copper chaperone	chr_8_2:59165-59869	1064.48	152.866	2.79981	1.76e-12	6.97e-12
estExt_Genewise1.C_40315	-	-	chr_7_1:450954-451813	12438.8	3005.9	2.04898	0.0112001	0.0189515
estExt_Genewise1.C_40419	Glyoxalase/bleomycin resistance protein/dioxygenase;4-hydroxyphenylpyruvate dioxygenase	KOG0638 4-hydroxyphenylpyruvate dioxygenase	chr_7_1:586078-587696	733.365	258.15	1.50632	1.13e-05	2.66e-05
estExt_Genewise1.C_40752	Protein of unknown function DUF967	-	chr_7_1:1102810-1103590	340.654	149.011	1.19289	7.95e-08	2.24e-07
estExt_Genewise1.C_41219	-	-	chr_7_1:1757877-1758857	2205.5	70.6118	4.96505	6.19e-131	2.76e-129
estExt_Genewise1.C_41282	Alkyl hydroperoxide reductase/ Thiol specific antioxidant/ Mal allergen	KOG0854 Alkyl hydroperoxide reductase, thiol specific antioxidant and related enzymes	chr_7_1:1874063-1875051	131.757	56.4763	1.22216	0.00143606	0.00271703
estExt_Genewise1.C_41543	ETC complex I subunit conserved region	KOG3389 NADH:ubiquinone oxidoreductase, NDUFS4/18 kDa subunit	chr_7_1:2291471-2292373	1254.09	225.06	2.47826	7.35e-07	1.93e-06
estExt_Genewise1.C_41547	-	-	chr_7_1:2292574-2293435	1590.79	700.126	1.18406	2.53e-31	2.29e-30
estExt_Genewise1.C_41582	Ribosomal protein L37e	KOG3475 60S ribosomal protein L37	chr_7_1:2345556-2346535	6838.36	858.534	2.9937	4.83e-101	1.52e-99
estExt_Genewise1.C_50143	Dienelactone hydrolase;ERG4/ERG24 ergosterol biosynthesis protein	KOG1435 Sterol reductase/lamin B receptor	chr_4_1:2264752-2268939	79.2298	36.7142	1.1097	0.0037902	0.00682982
estExt_Genewise1.C_50451	Ribosomal protein S21e	KOG3486 40S ribosomal protein S21	chr_4_1:1835792-1836799	6887.05	1054.04	2.70796	7.31e-60	1.31e-58
estExt_Genewise1.C_50536	-	-	chr_4_1:1706835-1707543	215.434	97.7137	1.14061	4.49e-06	1.1e-05
estExt_Genewise1.C_51142	Aromatic amino acid permease;Short-chain dehydrogenase/reductase SDR;Amino acid/polyamine transporter II;Glucose/ribitol dehydrogenase	KOG1305 Amino acid transporter protein	chr_4_1:835109-840620	57.9931	27.5711	1.07272	0.00697795	0.0121966
estExt_Genewise1.C_51149	Protein of unknown function UPF0005	KOG2322 N-methyl-D-aspartate receptor glutamate-binding subunit	chr_4_1:833308-834301	3473.61	556.086	2.64306	1.35e-26	1.05e-25
estExt_Genewise1.C_51511	-	KOG0012 DNA damage inducible protein	chr_4_1:310086-310998	274.023	44.512	2.62203	0.00528955	0.00934766
estExt_Genewise1.C_60420	Nascent polypeptide-associated complex NAC	KOG2239 Transcription factor containing NAC and TS-N domains	chr_3_4:483825-484915	1305.28	464.557	1.49043	1.51e-09	4.88e-09
estExt_Genewise1.C_60423	-	KOG3366 Mitochondrial F1F0-ATP synthase, subunit d/ATP7	chr_3_4:485328-486265	5254.19	1164.96	2.17319	1.68e-05	3.91e-05
estExt_Genewise1.C_60759	Major facilitator superfamily;General substrate transporter;Sugar transporter superfamily;Sugar transporter	KOG0254 Predicted transporter (major facilitator superfamily)	chr_3_4:954861-956894	4021.82	187.707	4.42129	1.5e-194	1.05e-192
estExt_Genewise1.C_61066	-	-	chr_3_4:1418630-1419868	509.222	190.281	1.42016	9.52e-06	2.26e-05
estExt_Genewise1.C_61110	DNA-binding HORMA	KOG3186 Mitotic spindle checkpoint protein	chr_3_4:1471329-1472163	279.103	132.902	1.07043	1.34e-08	4.04e-08
estExt_Genewise1.C_70185	Permease for cytosine/purines, uracil, thiamine, allantoin	-	chr_5_2:1503739-1505426	825.158	93.4332	3.14266	3.75e-16	1.83e-15
estExt_Genewise1.C_70299	-	-	chr_5_2:1354552-1355992	251.317	109.957	1.19257	5.63e-06	1.35e-05
estExt_Genewise1.C_80033	-	-	chr_1_2:43243-44293	501.281	81.958	2.61266	0.000109401	0.000232588
estExt_Genewise1.C_80147	-	-	chr_1_2:189217-190828	1963.97	440.437	2.15677	0.0171132	0.0284881
estExt_Genewise1.C_80185	Peptidylprolyl isomerase, FKBP-type	KOG0544 FKBP-type peptidyl-prolyl cis-trans isomerase	chr_1_2:240732-241546	2383.61	223.989	3.41165	5.07e-60	9.08e-59
estExt_Genewise1.C_80241	-	-	chr_1_2:304060-305095	4543	1284.36	1.8226	0.000881545	0.0017093
estExt_Genewise1.C_80589	-	-	chr_1_2:791997-793175	13877.5	5913.68	1.23062	1.93e-225	1.6e-223
estExt_Genewise1.C_80863	Peptidase aspartic, active site;Peptidase A1, pepsin	KOG1339 Aspartyl protease	chr_1_2:1145514-1147093	34270.4	49.0253	9.44922	0	0
estExt_Genewise1.C_80968	-	KOG3158 HSP90 co-chaperone p23	chr_1_2:1276744-1277757	1245.63	586.7	1.08618	3.52e-32	3.31e-31
estExt_Genewise1.C_90282	Protein of unknown function DUF341	KOG2551 Phospholipase/carboxyhydrolase	chr_3_2:1252097-1252983	238.381	96.8029	1.30015	0.000178073	0.000372917
estExt_Genewise1.C_90322	Synaptobrevin	KOG0860 Synaptobrevin/VAMP-like protein	chr_3_2:1202228-1203554	2449.19	771.123	1.66727	3.6e-07	9.59e-07
estExt_Genewise1.C_90335	Mitochondrial ribosome	KOG3446 NADH:ubiquinone oxidoreductase NDUFA2/B8 subunit	chr_3_2:1191455-1192127	1219.14	379.615	1.68325	0.000695522	0.00135828
estExt_Genewise1.C_90791	Isochorismatase hydrolase	KOG4044 Mitochondrial associated endoribonuclease MAR1 (isochorismatase superfamily)	chr_3_2:553688-554547	441.953	56.0549	2.97898	1.93e-07	5.3e-07
estExt_Genewise1.C_91032	Ubiquitin	KOG0005 Ubiquitin-like protein	chr_3_2:256511-257392	2809.96	610.139	2.20334	0.000380336	0.000768994
estExt_Genewise1.C_91054	Ribosomal protein L19e	KOG1696 60s ribosomal protein L19	chr_3_2:179940-181359	2326.29	1134.18	1.03638	2.11e-66	4.33e-65
estExt_Genewise1.C_91178	Gamma-glutamyl phosphate reductase GPR	KOG4165 Gamma-glutamyl phosphate reductase	chr_3_2:4128-6697	509.722	237.69	1.10063	1.13e-13	4.81e-13
estExt_fgenesh1_pg.C_100037	Major intrinsic protein	KOG0223 Aquaporin (major intrinsic protein family)	chr_8_1:139536-141994	5254.25	20.5191	8.00037	0	0
estExt_fgenesh1_pg.C_100140	Ras GTPase;GTP-binding nuclear protein Ran;Ras small GTPase, Rho type;Small GTP-binding protein domain;Ras small GTPase, Ras type;Sigma-54 factor, interaction region;Ras small GTPase, Rab type	KOG0394 Ras-related GTPase	chr_8_1:445837-446998	653.136	230.189	1.50456	2.82e-05	6.36e-05
estExt_fgenesh1_pg.C_100365	MaoC-like dehydratase	KOG1206 Peroxisomal multifunctional beta-oxidation protein and related enzymes	chr_8_1:1213562-1214884	351.712	24.7859	3.8268	1.87e-13	7.88e-13
estExt_fgenesh1_pg.C_100442	-	KOG4813 Translation initiation factor eIF3, p35 subunit	chr_8_1:1470311-1471447	595.594	199.467	1.57818	0.000930304	0.0018028
estExt_fgenesh1_pg.C_10096	CybS	KOG4097 Succinate dehydrogenase membrane anchor subunit and related proteins	chr_2_2:3490685-3491791	3403.26	688.157	2.30611	2.32e-08	6.87e-08
estExt_fgenesh1_pg.C_10097	Adenylosuccinate synthetase	KOG1355 Adenylosuccinate synthase	chr_2_2:3488182-3490022	331.254	160.767	1.04297	1.16e-10	4.07e-10
estExt_fgenesh1_pg.C_10139	Prefoldin-related KE2 protein	KOG1760 Molecular chaperone Prefoldin, subunit 4	chr_2_2:3341501-3342254	222.202	99.6944	1.15629	5.92e-06	1.42e-05
estExt_fgenesh1_pg.C_10140	Haem peroxidase, plant/fungal/bacterial	-	chr_2_2:3339276-3340654	197.293	89.1271	1.1464	1.31e-05	3.07e-05
estExt_fgenesh1_pg.C_10159	Ras GTPase;ARF/SAR superfamily;ADP-ribosylation factor;Small GTP-binding protein domain;GTP-binding protein SAR1	KOG0073 GTP-binding ADP-ribosylation factor-like protein ARL2	chr_2_2:3267138-3268044	105.64	49.3828	1.09708	0.000632639	0.00124489
estExt_fgenesh1_pg.C_10199	Chitin-binding, domain 3	KOG4157 beta-1,6-N-acetylglucosaminyltransferase, contains WSC domain	chr_2_2:3085323-3086218	333.836	7.88991	5.40299	3.8e-23	2.57e-22
estExt_fgenesh1_pg.C_10290	-	-	chr_2_2:2807955-2808825	2051.4	44.9535	5.51203	1.94e-140	9.36e-139
estExt_fgenesh1_pg.C_10344	Ribonuclease T2	KOG1642 Ribonuclease, T2 family	chr_2_2:2648865-2649884	3742.11	5.82605	9.32712	0	0
estExt_fgenesh1_pg.C_10374	Translationally controlled tumor protein;Mss4-like	KOG1727 Microtubule-binding protein (translationally controlled tumor protein)	chr_2_2:2533181-2534586	3024.06	855.286	1.82201	0.00659662	0.0115864
estExt_fgenesh1_pg.C_10395	Glutathione S-transferase, N-terminal;Glutathione S-transferase, C-terminal	KOG0867 Glutathione S-transferase	chr_2_2:2486032-2486955	702.908	70.208	3.32363	6.51e-17	3.31e-16
estExt_fgenesh1_pg.C_10422	Gar1 protein RNA-binding region;CDP-diacylglycerol--serine O-phosphatidyltransferase;CDP-alcohol phosphatidyltransferase	KOG3262 H/ACA small nucleolar RNP component GAR1	chr_2_2:2411936-2414410	251.257	103.128	1.28473	7.01e-05	0.000153208
estExt_fgenesh1_pg.C_10440	-	-	chr_2_2:2343253-2344042	108.78	41.0642	1.40546	0.0256516	0.0415348
estExt_fgenesh1_pg.C_10752	-	KOG4297 C-type lectin	chr_2_2:1389643-1390846	13396.4	1031.76	3.69867	0	0
estExt_fgenesh1_pg.C_10876	Glycoside hydrolase, family 12	-	chr_2_2:940965-941851	255.832	6.47082	5.3051	2.34e-17	1.21e-16
estExt_fgenesh1_pg.C_10934	O-methyltransferase, family 2;Generic methyltransferase	KOG3178 Hydroxyindole-O-methyltransferase and related SAM-dependent methyltransferases	chr_2_2:764653-766297	81.3658	3.63523	4.4843	7.09e-05	0.00015489
estExt_fgenesh1_pg.C_11004	Peptidase C1B, bleomycin hydrolases;Peptidase, eukaryotic cysteine peptidase active site	KOG4128 Bleomycin hydrolases and aminopeptidases of cysteine protease family	chr_2_2:536475-538285	200.713	31.8426	2.6561	0.0114411	0.0193528
estExt_fgenesh1_pg.C_110048	-	KOG0118 FOG: RRM domain	chr_1_1:1499513-1500444	6974.66	3044.74	1.1958	1.23e-126	5.28e-125
estExt_fgenesh1_pg.C_110120	GOLD;emp24/gp25L/p24	KOG1693 emp24/gp25L/p24 family of membrane trafficking proteins	chr_1_1:1283908-1284805	868.533	140.143	2.63168	2.21e-07	6.07e-07
estExt_fgenesh1_pg.C_110167	Short-chain dehydrogenase/reductase SDR;Glucose/ribitol dehydrogenase	KOG0725 Reductases with broad range of substrate specificities	chr_1_1:1118849-1120040	195.093	12.2974	3.98774	2.09e-08	6.18e-08
estExt_fgenesh1_pg.C_110352	Glycoside hydrolase, family 20	KOG2499 Beta-N-acetylhexosaminidase	chr_1_1:522754-524320	68.6482	33.5296	1.03379	0.00294327	0.0053419
estExt_fgenesh1_pg.C_110401	Copper amine oxidase	KOG1186 Copper amine oxidase	chr_1_1:370389-372704	222.502	23.8869	3.21953	1.14e-05	2.67e-05
estExt_fgenesh1_pg.C_11115	Glycoside hydrolase, family 11	-	chr_2_2:215792-217071	191.029	0.448257	8.73525	9.52e-18	5.04e-17
estExt_fgenesh1_pg.C_11133	-	-	chr_2_2:175505-176299	47.2983	0.526502	6.48921	0.000289869	0.000591901
estExt_fgenesh1_pg.C_11140	Peptidase A4, scytalidopepsin B	-	chr_2_2:157558-160271	24612.6	0.491786	15.611	0	0
estExt_fgenesh1_pg.C_120019	-	-	chr_3_1:1160757-1161410	881.233	162.067	2.44293	0.00011712	0.000248944
estExt_fgenesh1_pg.C_120041	-	-	chr_3_1:1082462-1083290	80.9348	38.8248	1.05978	0.00195736	0.00362036
estExt_fgenesh1_pg.C_120083	Amidase	KOG1212 Amidases	chr_3_1:938721-940749	307.442	148.953	1.04546	6.94e-10	2.29e-09
estExt_fgenesh1_pg.C_120365	Transferase	-	chr_3_1:60078-61482	555.019	9.24953	5.90701	3.02e-41	3.63e-40
estExt_fgenesh1_pg.C_130096	Short-chain dehydrogenase/reductase SDR;Glucose/ribitol dehydrogenase	KOG0725 Reductases with broad range of substrate specificities	chr_6_2:904518-905694	115.571	1.90308	5.9243	2.59e-09	8.26e-09
estExt_fgenesh1_pg.C_130114	Cyclin-like F-box	-	chr_6_2:858019-859802	102.103	7.45089	3.77647	0.000216301	0.000449423
estExt_fgenesh1_pg.C_130199	DSBA oxidoreductase	-	chr_6_2:635932-636776	79.7376	39.6842	1.0067	0.000871477	0.00169304
estExt_fgenesh1_pg.C_130251	Peptidase T1A, proteasome beta-subunit;20S proteasome, A and B subunits	KOG0180 20S proteasome, regulatory subunit beta type PSMB3/PUP3	chr_6_2:485173-486105	461.88	189.989	1.2816	7.33e-08	2.07e-07
estExt_fgenesh1_pg.C_130375	-	-	chr_6_2:33481-34243	99.4233	42.5666	1.22386	0.00491628	0.00874942
estExt_fgenesh1_pg.C_140026	-	-	chr_6_1:760125-760919	283.984	98.2531	1.53123	0.00902387	0.0154142
estExt_fgenesh1_pg.C_140070	Vitamin B6 biosynthesis protein;FMN/related compound-binding core	KOG1606 Stationary phase-induced protein, SOR/SNZ family	chr_6_1:939625-940782	625.24	300.243	1.05828	3.33e-18	1.81e-17
estExt_fgenesh1_pg.C_140210	-	-	chr_6_1:1394134-1394882	44271.9	1374.77	5.00913	0	0
estExt_fgenesh1_pg.C_150002	TPR repeat	KOG3060 Uncharacterized conserved protein	chr_2_1:7047-8356	325.733	135.993	1.26016	3.25e-06	8.04e-06
estExt_fgenesh1_pg.C_160062	Purine nucleoside permease	-	chr_5_1:206508-207793	625.875	47.2208	3.72838	2.52e-21	1.55e-20
estExt_fgenesh1_pg.C_160083	Flavoprotein monooxygenase;Aromatic-ring hydroxylase	KOG2614 Kynurenine 3-monooxygenase and related flavoprotein monooxygenases	chr_5_1:264774-266252	258.49	92.5874	1.48122	0.00529825	0.00936138
estExt_fgenesh1_pg.C_160095	-	-	chr_5_1:299081-299426	7990.78	839.491	3.25075	6.2e-166	3.53e-164
estExt_fgenesh1_pg.C_160264	Microsomal signal peptidase 12 kDa subunit	KOG4112 Signal peptidase subunit	chr_5_1:847183-847808	261.109	42.054	2.63434	0.00666843	0.0117104
estExt_fgenesh1_pg.C_170132	Thiolase	KOG1389 3-oxoacyl CoA thiolase	chr_6_2:1441208-1442800	684.042	62.8771	3.44348	9.74e-19	5.4e-18
estExt_fgenesh1_pg.C_170183	-	-	chr_6_2:1238471-1239847	2747.86	279.151	3.29919	4.15e-61	7.65e-60
estExt_fgenesh1_pg.C_170189	Manganese and iron superoxide dismutase	KOG0876 Manganese superoxide dismutase	chr_6_2:1226878-1227828	3014.56	345.021	3.12719	1.45e-54	2.32e-53
estExt_fgenesh1_pg.C_190129	Protein of unknown function DUF1275	-	chr_6_1:271989-272814	108.349	8.81207	3.62006	0.000221339	0.000459605
estExt_fgenesh1_pg.C_190136	-	-	chr_6_1:250284-252679	309.864	42.2453	2.87477	8.68e-05	0.000187457
estExt_fgenesh1_pg.C_190140	Glycoside hydrolase, family 62	-	chr_6_1:240512-241736	563.179	1.59142	8.46714	3.03e-52	4.64e-51
estExt_fgenesh1_pg.C_190157	NAD/NADP octopine/nopaline dehydrogenase	-	chr_6_1:191338-192492	171.217	1e-05	24.0293	7.87e-16	3.78e-15
estExt_fgenesh1_pg.C_20147	TspO/MBR-related protein	KOG3797 Peripheral-type benzodiazepine receptor and related proteins	chr_4_2:499388-500045	1776.6	341.626	2.37863	1.28e-06	3.25e-06
estExt_fgenesh1_pg.C_20186	Protein of unknown function DUF649	KOG2946 Uncharacterized conserved protein	chr_4_2:686238-687572	164.6	75.5654	1.12317	3.85e-05	8.6e-05
estExt_fgenesh1_pg.C_20213	Ubiquitin system component Cue	KOG0802 E3 ubiquitin ligase	chr_4_2:776402-777252	349.926	55.1489	2.66565	0.000834793	0.00162365
estExt_fgenesh1_pg.C_20335	NADH:cytochrome b5 reductase (CBR);Phenol hydroxylase reductase;Flavoprotein pyridine nucleotide cytochrome reductase;Oxidoreductase FAD-binding region;Oxidoreductase FAD/NAD(P)-binding	KOG0534 NADH-cytochrome b-5 reductase	chr_4_2:1237575-1238756	214.887	97.5785	1.13894	4.18e-06	1.02e-05
estExt_fgenesh1_pg.C_20338	Parallel beta-helix repeat;Glycoside hydrolase, family 28	-	chr_4_2:1246496-1247814	458.518	16.003	4.84056	1.32e-26	1.03e-25
estExt_fgenesh1_pg.C_20508	-	KOG4744 Uncharacterized conserved protein	chr_4_2:1847052-1847740	51.5793	4.37776	3.55853	0.0310362	0.0489398
estExt_fgenesh1_pg.C_20533	EB1 protein;Calponin-like actin-binding	KOG3000 Microtubule-binding protein involved in cell cycle control	chr_4_2:1943948-1945221	602.847	230.926	1.38436	2.76e-07	7.45e-07
estExt_fgenesh1_pg.C_20555	-	-	chr_4_2:2010738-2011226	2179.41	187.111	3.54197	1.44e-61	2.7e-60
estExt_fgenesh1_pg.C_20577	Glutathione peroxidase	KOG1651 Glutathione peroxidase	chr_4_2:2072874-2073768	832.73	164.581	2.33905	0.00276327	0.00503244
estExt_fgenesh1_pg.C_20682	-	KOG3221 Glycolipid transfer protein	chr_4_2:2473001-2473990	2256.83	201.313	3.48679	9.96e-61	1.83e-59
estExt_fgenesh1_pg.C_20823	Protein of unknown function DUF689	KOG4020 Protein DRE2, required for cell viability	chr_4_2:3000584-3001651	154.015	60.6273	1.34503	0.0050831	0.00898755
estExt_fgenesh1_pg.C_20969	-	-	chr_4_2:3448013-3450652	184.864	16.6367	3.47402	6.41e-06	1.54e-05
estExt_fgenesh1_pg.C_210040	-	-	chr_3_3:145685-146857	75.2859	3.60857	4.38288	0.000223784	0.000463535
estExt_fgenesh1_pg.C_210044	-	-	chr_3_3:130731-132404	4248.31	674.009	2.65605	3.21e-33	3.11e-32
estExt_fgenesh1_pg.C_210074	-	-	chr_3_3:38915-40008	2089.6	1020.79	1.03354	3.92e-60	7.08e-59
estExt_fgenesh1_pg.C_21030	Ribophorin I	KOG2291 Oligosaccharyltransferase, alpha subunit (ribophorin I)	chr_4_2:3651602-3653357	68.5646	31.7479	1.1108	0.0062893	0.0110562
estExt_fgenesh1_pg.C_240035	Sodium/calcium exchanger membrane region	KOG1397 Ca2+/H+ antiporter VCX1 and related proteins	chr_4_3:102368-103688	204.991	28.6859	2.83715	0.00194149	0.00359166
estExt_fgenesh1_pg.C_30087	-	-	chr_8_2:3027454-3028578	173.129	8.52114	4.34466	5.56e-09	1.72e-08
estExt_fgenesh1_pg.C_30116	Short-chain dehydrogenase/reductase SDR;Glucose/ribitol dehydrogenase	KOG0725 Reductases with broad range of substrate specificities	chr_8_2:2938711-2939865	945.108	83.9991	3.49203	1.34e-26	1.04e-25
estExt_fgenesh1_pg.C_30154	CFEM	KOG4297 C-type lectin	chr_8_2:2838207-2839531	1830.53	149.089	3.61802	3.16e-55	5.14e-54
estExt_fgenesh1_pg.C_30164	Ubiquitin-conjugating enzymes	KOG0419 Ubiquitin-protein ligase	chr_8_2:2812626-2813542	779.612	137.541	2.50289	4.71e-05	0.000104902
estExt_fgenesh1_pg.C_30173	-	-	chr_8_2:2783754-2785074	1506.72	300.028	2.32824	9.85e-05	0.000210381
estExt_fgenesh1_pg.C_30185	RNA-binding region RNP-1 (RNA recognition motif)	KOG0118 FOG: RRM domain	chr_8_2:2718738-2721114	1087.17	357.294	1.60539	3.68e-05	8.27e-05
estExt_fgenesh1_pg.C_30243	Ribosomal protein S17	-	chr_8_2:2526975-2527669	153.519	56.613	1.43921	0.0203814	0.0334423
estExt_fgenesh1_pg.C_30270	Protein of unknown function UPF0012;Nitrilase/cyanide hydratase and apolipoprotein N-acyltransferase;Ribosomal protein L31e	KOG0806 Carbon-nitrogen hydrolase	chr_8_2:2430351-2432866	781.209	312.603	1.32138	6.5e-11	2.31e-10
estExt_fgenesh1_pg.C_30292	Phosphoesterase	-	chr_8_2:2357373-2358880	513.049	15.0281	5.09336	5.44e-32	5.06e-31
estExt_fgenesh1_pg.C_30373	Glutamate decarboxylase;Pyridoxal-dependent decarboxylase	KOG1383 Glutamate decarboxylase/sphingosine phosphate lyase	chr_8_2:2120344-2122083	7204.67	657.534	3.45379	3.11e-185	2.05e-183
estExt_fgenesh1_pg.C_30378	Peptidase S10, serine carboxypeptidase;Esterase/lipase/thioesterase	KOG1282 Serine carboxypeptidases (lysosomal cathepsin A)	chr_8_2:2104124-2106095	1385.53	439.625	1.65609	7.42e-05	0.000161934
estExt_fgenesh1_pg.C_30379	Ribosomal protein S13	KOG3311 Ribosomal protein S18	chr_8_2:2102551-2103709	2122.12	892.479	1.24962	6.35e-34	6.29e-33
estExt_fgenesh1_pg.C_30506	Histone-fold/TFIID-TAF/NF-Y;Histone H3;Histone core	KOG1745 Histones H3 and H4	chr_8_2:1663407-1664411	16842.9	3630.49	2.2139	2.69e-20	1.6e-19
estExt_fgenesh1_pg.C_30645	CHCH	KOG3458 NADH:ubiquinone oxidoreductase, NDUFA8/PGIV/19 kDa subunit	chr_8_2:1190497-1191479	1288.68	266.979	2.2711	0.00198936	0.00367888
estExt_fgenesh1_pg.C_30666	Peptidase S8 and S53, subtilisin, kexin, sedolisin	-	chr_8_2:1125231-1127169	349.079	6.92015	5.65661	1.19e-25	8.98e-25
estExt_fgenesh1_pg.C_30678	Esterase/lipase/thioesterase;Peptidase S28	KOG2182 Hydrolytic enzymes of the alpha/beta hydrolase fold	chr_8_2:1090162-1092274	2417	21.6006	6.806	2.22e-200	1.61e-198
estExt_fgenesh1_pg.C_30755	-	KOG4157 beta-1,6-N-acetylglucosaminyltransferase, contains WSC domain	chr_8_2:818568-819574	24488.9	7128.5	1.78046	3.07e-23	2.08e-22
estExt_fgenesh1_pg.C_30764	Ribosomal protein L6E	KOG1694 60s ribosomal protein L6	chr_8_2:797256-798612	1530.42	538.497	1.50692	2.94e-10	1e-09
estExt_fgenesh1_pg.C_30904	Mitochondrial substrate carrier;Adenine nucleotide translocator 1;Mitochondrial carrier protein	KOG0754 Mitochondrial oxodicarboxylate carrier protein	chr_8_2:299721-300989	1419.48	252.233	2.49253	6.93e-08	1.96e-07
estExt_fgenesh1_pg.C_40133	Peptidase T1A, proteasome beta-subunit;20S proteasome, A and B subunits	KOG0175 20S proteasome, regulatory subunit beta type PSMB5/PSMB8/PRE2	chr_7_1:465362-466759	535.378	226.303	1.2423	5.55e-10	1.85e-09
estExt_fgenesh1_pg.C_40261	Esterase/lipase/thioesterase	KOG1455 Lysophospholipase	chr_7_1:883856-884830	340.544	57.9662	2.55456	0.00408948	0.00735465
estExt_fgenesh1_pg.C_40440	-	-	chr_7_1:1471770-1472843	262.907	89.6972	1.55142	0.0170771	0.0284326
estExt_fgenesh1_pg.C_40463	-	-	chr_7_1:1537939-1538714	218.028	14.7865	3.88216	4.42e-09	1.37e-08
estExt_fgenesh1_pg.C_40731	Ras GTPase;Ras small GTPase, Rho type;Small GTP-binding protein domain;Ras small GTPase, Ras type;Ras small GTPase, Rab type	KOG0393 Ras-related small GTPase, Rho type	chr_7_1:2369347-2370454	336.119	113.499	1.56629	0.00989637	0.0168645
estExt_fgenesh1_pg.C_40755	-	-	chr_7_1:2442738-2443641	1827.29	660.732	1.46757	5.3e-14	2.3e-13
estExt_fgenesh1_pg.C_40762	CHCH	KOG4090 Uncharacterized conserved protein	chr_7_1:2462121-2462889	438.038	174.014	1.33185	1.3e-06	3.29e-06
estExt_fgenesh1_pg.C_40798	Linker histone, N-terminal;Histone H5;Histone H1/H5	KOG4012 Histone H1	chr_7_1:2572864-2574243	1559.19	218.727	2.83359	1.03e-18	5.69e-18
estExt_fgenesh1_pg.C_40802	Ubiquitin-conjugating enzymes	KOG0417 Ubiquitin-protein ligase	chr_7_1:2585679-2587531	3038.81	1432.39	1.08508	3.6e-76	8.27e-75
estExt_fgenesh1_pg.C_40843	Ovarian tumour, otubain;Zn-finger, C2H2 type	KOG3288 OTU-like cysteine protease	chr_7_1:2742003-2743161	82.236	37.8491	1.11951	0.00436219	0.00781023
estExt_fgenesh1_pg.C_40858	Heat shock protein DnaJ, N-terminal;TPR repeat	KOG0624 dsRNA-activated protein kinase inhibitor P58, contains TPR and DnaJ domains	chr_7_1:2784389-2786023	173.14	65.6679	1.39868	0.0078428	0.0134423
estExt_fgenesh1_pg.C_40862	Histone-fold/TFIID-TAF/NF-Y;Histone H2A;Endoplasmic reticulum targeting sequence;Histone core	KOG1756 Histone 2A	chr_7_1:2792751-2793593	11672.5	2571.35	2.18252	2.04e-11	7.54e-11
estExt_fgenesh1_pg.C_50050	FMN-dependent alpha-hydroxy acid dehydrogenase;Cytochrome b5;L-lactate dehydrogenase, cytochrome;FMN/related compound-binding core	KOG0538 Glycolate oxidase	chr_4_1:2294464-2296174	124.249	59.5107	1.06201	0.000106482	0.000226715
estExt_fgenesh1_pg.C_50196	Mitochondrial ATPase inhibitor, IATP	-	chr_4_1:1754813-1755508	12404.4	4839.49	1.35793	4.37e-132	1.96e-130
estExt_fgenesh1_pg.C_50261	Short-chain dehydrogenase/reductase SDR;Glucose/ribitol dehydrogenase	KOG0725 Reductases with broad range of substrate specificities	chr_4_1:1528020-1529324	6799.64	1273.2	2.417	3.63e-25	2.66e-24
estExt_fgenesh1_pg.C_50295	-	KOG4096 Uncharacterized conserved protein	chr_4_1:1416083-1416874	1047.45	213.618	2.29378	0.00291286	0.00528861
estExt_fgenesh1_pg.C_50320	Zn-finger, C2H2 type	KOG1721 FOG: Zn-finger	chr_4_1:1326197-1327010	449.257	68.5779	2.71173	4.01e-05	8.95e-05
estExt_fgenesh1_pg.C_50393	-	-	chr_4_1:1107337-1108377	161.236	80.453	1.00296	1.97e-06	4.96e-06
estExt_fgenesh1_pg.C_50562	Malate dehydrogenase, NAD-dependent, eukaryotes and gamma proteobacteria;Lactate/malate dehydrogenase;Malate dehydrogenase, active site	KOG1494 NAD-dependent malate dehydrogenase	chr_4_1:460886-462893	1725.86	810.035	1.09126	1.8e-43	2.29e-42
estExt_fgenesh1_pg.C_50684	Secretory lipase	-	chr_4_1:100340-101597	178.724	65.8591	1.44028	0.0134777	0.0226117
estExt_fgenesh1_pg.C_60150	Hrf1	KOG3094 Predicted membrane protein	chr_3_4:480013-481235	183.071	71.3993	1.35842	0.00301434	0.00546695
estExt_fgenesh1_pg.C_60169	Amino acid permease-associated region;Amino acid/polyamine transporter I	KOG1289 Amino acid transporters	chr_3_4:531545-533229	107.418	11.2848	3.25078	0.0042152	0.00756992
estExt_fgenesh1_pg.C_60477	ATPase, ParA type;Mrp	KOG3022 Predicted ATPase, nucleotide-binding	chr_3_4:1498391-1499583	176.491	83.1617	1.0856	6.62e-06	1.58e-05
estExt_fgenesh1_pg.C_60479	3' exoribonuclease	KOG1068 Exosomal 3'-5' exoribonuclease complex, subunit Rrp41 and related exoribonucleases	chr_3_4:1506363-1507524	130.17	49.0764	1.4073	0.0162405	0.0271025
estExt_fgenesh1_pg.C_60516	Ribosomal protein L32e	KOG0878 60S ribosomal protein L32	chr_3_4:1619472-1620787	6407.75	1111.18	2.52773	9.07e-35	9.19e-34
estExt_fgenesh1_pg.C_60583	Peptidase A4, scytalidopepsin B	-	chr_3_4:1848638-1849512	75.8588	2.23136	5.08732	5.77e-05	0.00012727
estExt_fgenesh1_pg.C_70047	-	-	chr_5_2:1631002-1632640	95.1147	4.62554	4.36197	1.88e-05	4.34e-05
estExt_fgenesh1_pg.C_70105	Ribosomal protein P2;Ribosomal protein 60S	KOG3449 60S acidic ribosomal protein P2	chr_5_2:1433298-1434094	8735.89	1193.97	2.87119	4.34e-105	1.41e-103
estExt_fgenesh1_pg.C_70152	Aminotransferase, class-II	-	chr_5_2:1300246-1301251	213.545	28.7073	2.89505	0.000769666	0.00149929
estExt_fgenesh1_pg.C_70200	Phosphoesterase	-	chr_5_2:1134635-1136326	84.5556	3.13363	4.75399	3.25e-05	7.33e-05
estExt_fgenesh1_pg.C_70418	-	-	chr_5_2:397019-397717	640.625	14.0333	5.51255	5.84e-44	7.56e-43
estExt_fgenesh1_pg.C_70427	Glutathione S-transferase, N-terminal;Glutathione S-transferase, C-terminal	KOG0867 Glutathione S-transferase	chr_5_2:374134-374817	554.533	20.3838	4.76578	1.57e-31	1.43e-30
estExt_fgenesh1_pg.C_70437	ARP2/3 complex, 21 kDa p21-Arc subunit	KOG3155 Actin-related protein Arp2/3 complex, subunit ARPC3	chr_5_2:351245-352290	301.414	119.456	1.33527	6.09e-05	0.000134204
estExt_fgenesh1_pg.C_70465	Major facilitator superfamily	KOG0255 Synaptic vesicle transporter SVOP and related transporters (major facilitator superfamily)	chr_5_2:261396-263369	57.4544	4.37282	3.71578	0.0116619	0.0197197
estExt_fgenesh1_pg.C_70473	-	-	chr_5_2:239515-241223	109.459	0.241288	8.82542	6.63e-10	2.2e-09
estExt_fgenesh1_pg.C_80118	-	-	chr_1_2:374364-374868	10837.3	424.172	4.67521	0	0
estExt_fgenesh1_pg.C_80272	Profilin/allergen	KOG1755 Profilin	chr_1_2:815501-816506	3220.19	999.16	1.68836	6.5e-08	1.86e-07
estExt_fgenesh1_pg.C_80371	Uncharacterized Cys-rich domain	KOG3227 Calcium-responsive transcription coactivator	chr_1_2:1129902-1130978	169.983	63.6081	1.41811	0.00912915	0.0155861
estExt_fgenesh1_pg.C_80395	Ribosomal protein L10	KOG0816 Protein involved in mRNA turnover	chr_1_2:1202199-1203273	71.4578	35.5831	1.0059	0.00164832	0.00309998
estExt_fgenesh1_pg.C_80444	-	-	chr_1_2:1369378-1370163	13523.7	265.189	5.67233	0	0
estExt_fgenesh1_pg.C_80487	Enoyl-CoA hydratase/isomerase	KOG1684 Enoyl-CoA hydratase	chr_1_2:1506558-1508212	145.231	72.193	1.00842	6.7e-06	1.6e-05
estExt_fgenesh1_pg.C_80546	-	-	chr_1_2:1683897-1684744	3739.59	1196.1	1.64454	1.27e-11	4.79e-11
estExt_fgenesh1_pg.C_90010	GTP cyclohydrolase II	KOG1284 Bifunctional GTP cyclohydrolase II/3,4-dihydroxy-2butanone-4-phosphate synthase	chr_3_2:1657204-1658882	97.8411	3.37544	4.85729	3.15e-06	7.79e-06
estExt_fgenesh1_pg.C_90159	Protein of unknown function UPF0041	KOG1589 Uncharacterized conserved protein	chr_3_2:1190265-1191236	980.669	313.602	1.64483	0.000540378	0.00106982
estExt_fgenesh1_pg.C_90445	-	-	chr_3_2:342867-344971	185.263	0.558542	8.37369	3.58e-17	1.85e-16
estExt_fgenesh1_pm.C_100022	Flavoprotein monooxygenase;Aromatic-ring hydroxylase;NAD-binding site	KOG2614 Kynurenine 3-monooxygenase and related flavoprotein monooxygenases	chr_8_1:242576-244151	489.169	87.9636	2.47535	0.00223067	0.00409804
estExt_fgenesh1_pm.C_100071	Actin/actin-like	KOG0678 Actin-related protein Arp2/3 complex, subunit Arp3	chr_8_1:735813-737514	365.082	154.562	1.24003	3.45e-07	9.21e-07
estExt_fgenesh1_pm.C_100181	Ras GTPase;Ras small GTPase, Rho type;Small GTP-binding protein domain;Ras small GTPase, Ras type;Ras small GTPase, Rab type	KOG0393 Ras-related small GTPase, Rho type	chr_8_1:1417318-1419032	5759.81	1075.8	2.42061	6.7e-22	4.23e-21
estExt_fgenesh1_pm.C_10073	Ribosomal protein S7, eukaryotic and archaeal form;Ribosomal protein S7	KOG3291 Ribosomal protein S7	chr_2_2:3287592-3288633	5022.48	991.273	2.34105	7.17e-14	3.09e-13
estExt_fgenesh1_pm.C_10106	-	KOG4701 Chitinase	chr_2_2:3089025-3092232	465.889	7.43808	5.96891	3.45e-35	3.55e-34
estExt_fgenesh1_pm.C_10300	Prefoldin-related KE2 protein;Protein of unknown function DUF334	KOG3501 Molecular chaperone Prefoldin, subunit 1	chr_2_2:1959135-1959826	374.369	125.062	1.58182	0.00890109	0.0152122
estExt_fgenesh1_pm.C_10308	-	-	chr_2_2:1914137-1915051	1569.19	178.969	3.13224	1.73e-29	1.48e-28
estExt_fgenesh1_pm.C_10382	Esterase/lipase/thioesterase;Alpha/beta hydrolase fold	KOG2382 Predicted alpha/beta hydrolase	chr_2_2:1524095-1525336	183.746	69.3505	1.40573	0.00612048	0.0107688
estExt_fgenesh1_pm.C_10409	F-actin capping protein, beta subunit	KOG3174 F-actin capping protein, beta subunit	chr_2_2:1400995-1402236	349.204	118.736	1.55631	0.00813335	0.0139285
estExt_fgenesh1_pm.C_10420	Aminoglycoside phosphotransferase;Serine/threonine protein kinase, active site	-	chr_2_2:1338541-1339920	112.431	9.93494	3.50038	0.000432207	0.000859889
estExt_fgenesh1_pm.C_10468	-	-	chr_2_2:1046909-1047993	639.901	125.33	2.35212	0.00796507	0.0136472
estExt_fgenesh1_pm.C_10565	-	-	chr_2_2:541675-544260	1031.97	8.71932	6.88697	8.84e-87	2.29e-85
estExt_fgenesh1_pm.C_10623	Major facilitator superfamily	-	chr_2_2:76730-78524	177.123	15.3977	3.52396	6.48e-06	1.55e-05
estExt_fgenesh1_pm.C_110001	ER lumen protein retaining receptor	KOG3106 ER lumen protein retaining receptor	chr_1_1:1635268-1636372	909.209	106.674	3.0914	1.1e-16	5.52e-16
estExt_fgenesh1_pm.C_110148	Tetrapeptide transporter, OPT1/isp4;Oligopeptide transporter OPT superfamily	KOG2262 Sexual differentiation process protein ISP4	chr_1_1:835730-838228	1328.97	230.632	2.52664	2.8e-08	8.21e-08
estExt_fgenesh1_pm.C_120090	Alpha amylase, catalytic region;Alpha amylase, catalytic subdomain	KOG0471 Alpha-amylase	chr_3_1:589070-590721	84.5037	4.10752	4.36268	0.000181959	0.000379871
estExt_fgenesh1_pm.C_130054	Histidine acid phosphatase	KOG1382 Multiple inositol polyphosphate phosphatase	chr_6_2:891190-893152	87.7016	7.41119	3.56483	0.00214044	0.00394883
estExt_fgenesh1_pm.C_130063	Cytochrome b5;Acyl-CoA dehydrogenase, C-terminal;Acyl-CoA dehydrogenase, central region	KOG0139 Short-chain acyl-CoA dehydrogenase	chr_6_2:841923-843925	243.31	87.0408	1.48303	0.00622344	0.0109481
estExt_fgenesh1_pm.C_130067	-	-	chr_6_2:813872-815036	367.539	36.3815	3.33662	1.46e-09	4.74e-09
estExt_fgenesh1_pm.C_130080	Delta 1-pyrroline-5-carboxylate reductase	KOG3124 Pyrroline-5-carboxylate reductase	chr_6_2:732063-733084	427.558	159.7	1.42076	5.99e-05	0.000131991
estExt_fgenesh1_pm.C_130124	Endoplasmic reticulum targeting sequence;Peptidyl-prolyl cis-trans isomerase, cyclophilin type	KOG0880 Peptidyl-prolyl cis-trans isomerase	chr_6_2:546002-546985	1141.33	121.689	3.22945	1.94e-24	1.4e-23
estExt_fgenesh1_pm.C_130135	Peptidase T1A, proteasome beta-subunit;20S proteasome, A and B subunits	KOG0177 20S proteasome, regulatory subunit beta type PSMB2/PRE1	chr_6_2:508643-509740	1171.21	461.567	1.34339	1.43e-14	6.42e-14
estExt_fgenesh1_pm.C_130167	DNA-binding SAP	-	chr_6_2:373557-374844	12217.3	941.521	3.69779	0	0
estExt_fgenesh1_pm.C_140002	-	-	chr_6_1:685431-687144	43.0084	0.903393	5.57312	0.000677735	0.00132766
estExt_fgenesh1_pm.C_140119	-	-	chr_6_1:1505799-1506755	128.554	51.5635	1.31795	0.00706869	0.0123509
estExt_fgenesh1_pm.C_150076	Metallophosphoesterase	KOG1378 Purple acid phosphatase	chr_2_1:449014-451049	469.423	31.2619	3.90841	3.29e-18	1.78e-17
estExt_fgenesh1_pm.C_160058	Ubiquitin-conjugating enzymes	KOG0418 Ubiquitin-protein ligase	chr_5_1:366931-368095	749.766	138.725	2.43421	0.000450405	0.000894152
estExt_fgenesh1_pm.C_160078	Chaperone DnaJ, C-terminal;Heat shock protein DnaJ, N-terminal;Heat shock protein DnaJ	KOG0714 Molecular chaperone (DnaJ superfamily)	chr_5_1:503463-504995	208.326	102.967	1.01666	1.42e-07	3.94e-07
estExt_fgenesh1_pm.C_160109	TB2/DP1 and HVA22 related protein	KOG1725 Protein involved in membrane traffic (YOP1/TB2/DP1/HVA22 family)	chr_5_1:657653-659334	5852.86	895.526	2.70833	3.25e-51	4.88e-50
estExt_fgenesh1_pm.C_160116	Sodium/hydrogen exchanger;Sodium/hydrogen exchanger subfamily	KOG1965 Sodium/hydrogen exchanger protein	chr_5_1:689191-691999	90.7649	37.8297	1.26262	0.0117633	0.0198845
estExt_fgenesh1_pm.C_160118	Transcription factor, STE-like;Zn-finger, C2H2 type	KOG1721 FOG: Zn-finger	chr_5_1:696053-698613	96.6488	39.3507	1.29636	0.0139934	0.0234692
estExt_fgenesh1_pm.C_160123	Major facilitator superfamily	KOG0255 Synaptic vesicle transporter SVOP and related transporters (major facilitator superfamily)	chr_5_1:721356-723146	930.442	2.51238	8.53272	4.26e-86	1.09e-84
estExt_fgenesh1_pm.C_170004	-	-	chr_6_2:1851698-1852805	921.354	47.1149	4.2895	1.12e-42	1.4e-41
estExt_fgenesh1_pm.C_180034	-	-	chr_5_3:491476-492807	368.681	179.485	1.03851	6.86e-12	2.63e-11
estExt_fgenesh1_pm.C_180079	Protein of unknown function DUF962	KOG3292 Predicted membrane protein	chr_5_3:204268-205115	1030.23	358.404	1.52331	6.33e-07	1.67e-06
estExt_fgenesh1_pm.C_190032	Glycoside hydrolase, family 10	-	chr_6_1:237730-239281	108.749	1.64148	6.04986	8.67e-09	2.65e-08
estExt_fgenesh1_pm.C_190036	Taurine catabolism dioxygenase TauD/TfdA	-	chr_6_1:189119-190537	1015.42	0.825371	10.2647	2.82e-98	8.47e-97
estExt_fgenesh1_pm.C_200024	Ribosomal L37ae protein	KOG0402 60S ribosomal protein L37	chr_6_3:232995-233753	17212.1	2957.07	2.54118	6.78e-95	1.95e-93
estExt_fgenesh1_pm.C_20029	TMS membrane protein/tumour differentially expressed protein	KOG2592 Tumor differentially expressed (TDE) protein	chr_4_2:587097-588811	547.382	103.858	2.39794	0.00545153	0.00962546
estExt_fgenesh1_pm.C_20098	Uricase	KOG1599 Uricase (urate oxidase)	chr_4_2:1507000-1508069	7624.99	1397.15	2.44825	1.54e-31	1.41e-30
estExt_fgenesh1_pm.C_20137	Ketose-bisphosphate aldolase, class-II;Fructose-bisphosphate aldolase, class II, yeast/E. coli subtype	KOG4153 Fructose 1,6-bisphosphate aldolase	chr_4_2:1882686-1884519	1641.47	776.608	1.07973	1.93e-42	2.4e-41
estExt_fgenesh1_pm.C_20193	GNS1/SUR4 membrane protein	KOG3071 Fatty acyl-CoA elongase/Polyunsaturated fatty acid specific elongation enzyme	chr_4_2:2545606-2546751	179.091	72.2	1.31062	0.00127383	0.00243709
estExt_fgenesh1_pm.C_20267	RNA-binding S4;Ribosomal protein S4/9, eukaryotic and archaeal form;Ribosomal protein S4	KOG3301 Ribosomal protein S4	chr_4_2:3472603-3473730	4253	803.878	2.40343	1.56e-15	7.36e-15
estExt_fgenesh1_pm.C_30026	Peptidase S8 and S53, subtilisin, kexin, sedolisin	-	chr_8_2:3029595-3031595	739.987	70.6081	3.38959	4.6e-19	2.6e-18
estExt_fgenesh1_pm.C_30050	Ubiquitin-conjugating enzymes	KOG0425 Ubiquitin-protein ligase	chr_8_2:2827768-2829084	405.049	43.7418	3.21101	2.39e-09	7.67e-09
estExt_fgenesh1_pm.C_30089	Histidine triad (HIT) protein	KOG3275 Zinc-binding protein of the histidine triad (HIT) family	chr_8_2:2602389-2603576	819.797	313.562	1.38652	2.42e-09	7.74e-09
estExt_fgenesh1_pm.C_30115	UDP-galactose transporter;Nucleotide-sugar transporter	KOG2234 Predicted UDP-galactose transporter	chr_8_2:2495904-2497218	92.6082	39.205	1.2401	0.00684414	0.0120106
estExt_fgenesh1_pm.C_30215	Aldehyde dehydrogenase	KOG2450 Aldehyde dehydrogenase	chr_8_2:1737875-1740737	537.964	89.7451	2.5836	0.000129361	0.000273463
estExt_fgenesh1_pm.C_30243	Band 7 protein;Prohibitin	KOG3083 Prohibitin	chr_8_2:1557995-1558903	557.553	268.642	1.05342	1.57e-16	7.83e-16
estExt_fgenesh1_pm.C_30314	Allergen V5/Tpx-1 related	KOG3017 Defense-related protein containing SCP domain	chr_8_2:1211206-1212684	826.734	77.3476	3.41799	1.45e-21	9.01e-21
estExt_fgenesh1_pm.C_40169	Cytochrome b5	KOG0537 Cytochrome b5	chr_7_1:1163368-1164605	5202.49	565.65	3.20122	2.3e-102	7.25e-101
estExt_fgenesh1_pm.C_40325	Phox-like	KOG2527 Sorting nexin SNX11	chr_7_1:2309818-2310423	983.955	145.314	2.75942	1.04e-10	3.65e-10
estExt_fgenesh1_pm.C_40362	Eukaryotic translation initiation factor SUI1;Translation initiation factor SUI1	KOG1770 Translation initiation factor 1 (eIF-1/SUI1)	chr_7_1:2490810-2493890	2100.34	751.19	1.48337	5.3e-15	2.44e-14
estExt_fgenesh1_pm.C_50081	Glycosyl transferase, family 20	KOG1050 Trehalose-6-phosphate synthase component TPS1 and related subunits	chr_4_1:1975148-1977500	197.822	90.3274	1.13097	6.97e-06	1.66e-05
estExt_fgenesh1_pm.C_50093	-	KOG4701 Chitinase	chr_4_1:1899092-1900272	2706.41	265.183	3.35132	1.23e-63	2.4e-62
estExt_fgenesh1_pm.C_50100	Peptidyl-prolyl cis-trans isomerase, cyclophilin type	KOG0865 Cyclophilin type peptidyl-prolyl cis-trans isomerase	chr_4_1:1875535-1877063	6377.13	1032.77	2.62639	9.41e-46	1.28e-44
estExt_fgenesh1_pm.C_50111	Peptidase S10, serine carboxypeptidase	KOG1282 Serine carboxypeptidases (lysosomal cathepsin A)	chr_4_1:1814234-1817159	303.034	3.63245	6.38239	1.49e-24	1.08e-23
estExt_fgenesh1_pm.C_50129	Glycoside hydrolase, family 16	KOG4157 beta-1,6-N-acetylglucosaminyltransferase, contains WSC domain	chr_4_1:1692697-1694627	142.272	66.3857	1.09971	7.02e-05	0.000153433
estExt_fgenesh1_pm.C_50166	Ribosomal protein S14	KOG1741 Mitochondrial/chloroplast ribosomal protein S14/S29	chr_4_1:1474770-1475403	1082.56	125.446	3.10931	5.26e-20	3.08e-19
estExt_fgenesh1_pm.C_50187	D-tyrosyl-tRNA(Tyr) deacylase	KOG3323 D-Tyr-tRNA (Tyr) deacylase	chr_4_1:1319733-1320873	120.049	56.1291	1.0968	0.000244411	0.000505119
estExt_fgenesh1_pm.C_50259	Short-chain dehydrogenase/reductase SDR;Glucose/ribitol dehydrogenase	KOG0725 Reductases with broad range of substrate specificities	chr_4_1:810938-812021	2364.78	405.511	2.54389	2.02e-14	9.02e-14
estExt_fgenesh1_pm.C_70031	2-nitropropane dioxygenase, NPD;FMN/related compound-binding core	-	chr_5_2:1515713-1517091	539.813	93.1387	2.53501	0.000446612	0.000886798
estExt_fgenesh1_pm.C_70078	Glycosyl transferase, family 2	KOG2978 Dolichol-phosphate mannosyltransferase	chr_5_2:1308526-1309469	1071.81	194.132	2.46494	8.83e-06	2.09e-05
estExt_fgenesh1_pm.C_70192	26S proteasome non-ATPase regulatory subunit Nin1/mts3	KOG3151 26S proteasome regulatory complex, subunit RPN12/PSMD8	chr_5_2:508533-509524	514.582	160.974	1.67657	0.0244943	0.0397313
estExt_fgenesh1_pm.C_70195	Epoxide hydrolase;Esterase/lipase/thioesterase;Epoxide hydrolase, N-terminal	KOG2565 Predicted hydrolases or acyltransferases (alpha/beta hydrolase superfamily)	chr_5_2:501998-503653	158.015	14.9505	3.4018	4.23e-05	9.43e-05
estExt_fgenesh1_pm.C_80019	Short-chain dehydrogenase/reductase SDR;Glucose/ribitol dehydrogenase	KOG1209 1-Acyl dihydroxyacetone phosphate reductase and related dehydrogenases	chr_1_2:84254-85498	357.565	61.1284	2.54829	0.0042769	0.00766298
estExt_fgenesh1_pm.C_80076	Phosphoesterase;Rhodopsin-like GPCR superfamily	-	chr_1_2:409630-411494	82.3372	2.65439	4.95509	1.1e-05	2.6e-05
estExt_fgenesh1_pm.C_80080	Generic methyltransferase;SAM (and some other nucleotide) binding motif	KOG1269 SAM-dependent methyltransferases	chr_1_2:416851-418329	290.03	100.514	1.52881	0.00827462	0.0141656
estExt_fgenesh1_pm.C_80098	-	KOG4701 Chitinase	chr_1_2:546862-549703	45.7586	1.94753	4.55433	0.0033304	0.00601203
estExt_fgenesh1_pm.C_80109	-	-	chr_1_2:591465-592864	813.722	132.513	2.6184	7.65e-07	2.01e-06
estExt_fgenesh1_pm.C_80200	Triosephosphate isomerase	KOG1643 Triosephosphate isomerase	chr_1_2:1198825-1199993	1273.91	206.896	2.62229	3.26e-10	1.11e-09
estExt_fgenesh1_pm.C_90067	Ubiquitin-conjugating enzymes	KOG0417 Ubiquitin-protein ligase	chr_3_2:1262364-1263318	563.952	194.098	1.53879	0.000299287	0.000610637
estExt_fgenesh1_pm.C_90133	Peptidase S28	KOG2182 Hydrolytic enzymes of the alpha/beta hydrolase fold	chr_3_2:876063-877773	238.866	20.4781	3.54405	1.09e-07	3.05e-07
estExt_fgenesh1_pm.C_90163	Ribosomal protein L10E	KOG0857 60s ribosomal protein L10	chr_3_2:618903-619909	4125.73	1663.15	1.31073	4.94e-53	7.73e-52
estExt_fgenesh1_pm.C_90164	Ribosomal protein L30e;Ribosomal protein L7Ae/L30e/S12e/Gadd45	KOG2988 60S ribosomal protein L30	chr_3_2:617586-618494	3428.78	746.198	2.20006	0.000100106	0.000213547
estExt_fgenesh1_pm.C_90193	-	-	chr_3_2:494330-495401	659.947	48.2704	3.77314	5.25e-23	3.5e-22
estExt_fgenesh1_pm.C_90240	Tubulin binding cofactor A	KOG3470 Beta-tubulin folding cofactor A	chr_3_2:262452-263247	207.681	88.0875	1.23736	8.81e-05	0.000190226
estExt_fgenesh1_pm.C_90261	Haloacid dehalogenase/epoxide hydrolase;HAD-superfamily hydrolase, subfamily IA, variant 2;Haloacid dehalogenase-like hydrolase	-	chr_3_2:107021-108135	107.636	11.9304	3.17345	0.0042152	0.00756992
fgenesh1_pg.C_scaffold_10000042	-	-	chr_8_1:150882-151301	106.274	3.33754	4.99286	6.62e-07	1.75e-06
fgenesh1_pg.C_scaffold_10000094	Transferase	-	chr_8_1:301520-302929	160.621	19.2246	3.06264	0.0015548	0.00293286
fgenesh1_pg.C_scaffold_10000098	-	-	chr_8_1:319950-320489	953.733	323.353	1.56048	1.13e-05	2.66e-05
fgenesh1_pg.C_scaffold_10000230	-	-	chr_8_1:752757-753243	483.962	46.8434	3.36898	9.21e-13	3.71e-12
fgenesh1_pg.C_scaffold_10000311	Inosine/uridine-preferring nucleoside hydrolase	KOG2938 Predicted inosine-uridine preferring nucleoside hydrolase	chr_8_1:1037468-1038881	228.67	39.4955	2.53351	0.0276368	0.0446846
fgenesh1_pg.C_scaffold_10000344	Glutaredoxin;Thioredoxin-related;Thioredoxin domain 2	KOG1752 Glutaredoxin and related proteins	chr_8_1:1141182-1141699	2344.07	427.691	2.45437	6.53e-11	2.31e-10
fgenesh1_pg.C_scaffold_10000351	Ankyrin	-	chr_8_1:1158149-1158751	342.599	154.125	1.15242	1.06e-08	3.23e-08
fgenesh1_pg.C_scaffold_1000041	-	-	chr_2_2:3659305-3660517	355.021	22.2734	3.99451	9.73e-15	4.44e-14
fgenesh1_pg.C_scaffold_10000442	-	-	chr_8_1:1449958-1450856	453.927	89.7896	2.33784	0.0288452	0.0456278
fgenesh1_pg.C_scaffold_10000454	CFEM	KOG4701 Chitinase	chr_8_1:1492274-1493049	136.829	1.80945	6.24068	2.16e-11	7.97e-11
fgenesh1_pg.C_scaffold_1000242	-	-	chr_2_2:2966205-2966853	159.511	21.9927	2.85856	0.00543946	0.00960753
fgenesh1_pg.C_scaffold_1000277	-	-	chr_2_2:2864752-2865168	40.2697	2.34567	4.10162	0.0235221	0.038259
fgenesh1_pg.C_scaffold_1000416	Zn-finger, FYVE type	KOG1729 FYVE finger containing protein	chr_2_2:2452693-2453767	80.3812	37.1983	1.11162	0.00280462	0.00510683
fgenesh1_pg.C_scaffold_1000422	-	-	chr_2_2:2440189-2441597	30.5487	0.82371	5.21283	0.0133129	0.0223501
fgenesh1_pg.C_scaffold_1000423	-	-	chr_2_2:2439404-2440009	46.5805	0.557226	6.38532	0.000446489	0.000886903
fgenesh1_pg.C_scaffold_1000447	Pyruvate decarboxylase	KOG4166 Thiamine pyrophosphate-requiring enzyme	chr_2_2:2352414-2353336	45.4322	22.3117	1.02591	0.0103889	0.0176949
fgenesh1_pg.C_scaffold_1000690	-	-	chr_2_2:1632083-1632772	4556.11	166.199	4.77682	1.1e-252	9.98e-251
fgenesh1_pg.C_scaffold_1000800	Mitochondrial substrate carrier;Mitochondrial carrier protein	KOG0769 Predicted mitochondrial carrier protein	chr_2_2:1254827-1256006	92.1382	11.2989	3.02762	0.0210994	0.0344352
fgenesh1_pg.C_scaffold_1000806	H+-transporting two-sector ATPase, gamma subunit	KOG1531 F0F1-type ATP synthase, gamma subunit	chr_2_2:1235691-1237003	1632.5	518.38	1.655	1.55e-05	3.61e-05
fgenesh1_pg.C_scaffold_1000929	KOW;Eukaryotic initiation factor 5A hypusine (eIF-5A)	KOG3271 Translation initiation factor 5A (eIF-5A)	chr_2_2:822001-822596	3715.03	808.848	2.19943	4.69e-05	0.000104461
fgenesh1_pg.C_scaffold_1001002	Mg2+ transporter protein, CorA-like	-	chr_2_2:594271-595421	461.932	187.165	1.30337	1.57e-07	4.36e-07
fgenesh1_pg.C_scaffold_1001021	Calcium-binding EF-hand	-	chr_2_2:540318-540742	335.108	4.60367	6.1857	2.32e-26	1.8e-25
fgenesh1_pg.C_scaffold_1001049	-	-	chr_2_2:462616-462945	1067.56	107.512	3.31175	7.06e-25	5.14e-24
fgenesh1_pg.C_scaffold_1001090	Serine/threonine protein kinase;Tyrosine protein kinase;Protein kinase;Tyrosine protein kinase, active site	KOG0198 MEKK and related serine/threonine protein kinases	chr_2_2:340125-340984	334.342	123.902	1.43213	0.000591553	0.00116769
fgenesh1_pg.C_scaffold_1001155	Peptidase S26B, eukaryotic signal peptidase;Peptidase S24, S26A and S26B;Peptidase S26, signal peptidase I	KOG3342 Signal peptidase I	chr_2_2:167283-167975	707.895	94.606	2.90353	2.84e-10	9.67e-10
fgenesh1_pg.C_scaffold_1001164	-	-	chr_2_2:137703-138281	160.041	5.91173	4.75872	4.92e-10	1.65e-09
fgenesh1_pg.C_scaffold_11000060	Adrenodoxin;Cytochrome c heme-binding site;Ferredoxin	KOG3309 Ferredoxin	chr_1_1:1471665-1472405	108.346	45.702	1.24532	0.00503572	0.00890534
fgenesh1_pg.C_scaffold_11000162	Pirin, N-terminal;Cupin region	-	chr_1_1:1141914-1142854	374.766	23.8216	3.97565	1.35e-15	6.37e-15
fgenesh1_pg.C_scaffold_11000202	-	-	chr_1_1:1008650-1009118	116.34	1e-05	23.4718	1.11e-10	3.9e-10
fgenesh1_pg.C_scaffold_11000234	D-isomer specific 2-hydroxyacid dehydrogenase, NAD-binding;D-isomer specific 2-hydroxyacid dehydrogenase, catalytic region	KOG0069 Glyoxylate/hydroxypyruvate reductase (D-isomer-specific 2-hydroxy acid dehydrogenase superfamily)	chr_1_1:920100-921340	59.8205	2.0482	4.86821	0.000830964	0.00161651
fgenesh1_pg.C_scaffold_11000284	E-class P450, group I;Cytochrome P450	KOG0156 Cytochrome P450 CYP2 subfamily	chr_1_1:762203-764015	175.494	3.0754	5.8345	6.01e-13	2.45e-12
fgenesh1_pg.C_scaffold_11000285	Ribosomal protein S19e	-	chr_1_1:759965-761057	68.1275	1e-05	22.6998	3.91e-06	9.59e-06
fgenesh1_pg.C_scaffold_11000328	Dehydrogenase, E1 component	KOG1182 Branched chain alpha-keto acid dehydrogenase complex, alpha subunit	chr_1_1:616218-617775	81.3457	40.2973	1.01338	0.000684521	0.00133861
fgenesh1_pg.C_scaffold_11000353	PEBP;Phosphatidylethanolamine-binding protein	KOG3346 Phosphatidylethanolamine binding protein	chr_1_1:548700-549516	117.73	44.0165	1.41937	0.0246658	0.0400031
fgenesh1_pg.C_scaffold_11000354	-	-	chr_1_1:545591-546884	577.81	29.3667	4.29834	2.38e-27	1.9e-26
fgenesh1_pg.C_scaffold_11000474	Histone H4	-	chr_1_1:201185-201877	143.13	18.043	2.98781	0.00462572	0.00826883
fgenesh1_pg.C_scaffold_12000021	YjgF-like protein;Endoribonuclease L-PSP	KOG2317 Putative translation initiation inhibitor UK114/IBM1	chr_3_1:1154353-1155118	2105.6	187.81	3.48689	7.21e-57	1.22e-55
fgenesh1_pg.C_scaffold_12000028	Transport protein particle (TRAPP) component, Bet3	KOG3330 Transport protein particle (TRAPP) complex subunit	chr_3_1:1134132-1135036	232.043	92.6275	1.32488	0.000417097	0.000833284
fgenesh1_pg.C_scaffold_12000324	-	-	chr_3_1:180487-181304	69.9341	1.5957	5.45373	2.5e-05	5.68e-05
fgenesh1_pg.C_scaffold_12000326	-	-	chr_3_1:178122-178498	565.177	1.30226	8.76154	1.94e-52	2.99e-51
fgenesh1_pg.C_scaffold_12000336	Peptidase S10, serine carboxypeptidase	KOG1282 Serine carboxypeptidases (lysosomal cathepsin A)	chr_3_1:147427-149357	155.557	62.9092	1.3061	0.00311669	0.00564953
fgenesh1_pg.C_scaffold_12000352	-	KOG4157 beta-1,6-N-acetylglucosaminyltransferase, contains WSC domain	chr_3_1:115544-116678	40.9422	0.129268	8.30708	0.00160656	0.00302823
fgenesh1_pg.C_scaffold_12000369	-	-	chr_3_1:64162-64768	50.6078	3.67421	3.78385	0.0173029	0.0287991
fgenesh1_pg.C_scaffold_13000029	Isochorismatase hydrolase	-	chr_6_2:1129662-1130311	724.015	133.756	2.43642	0.000494623	0.000980582
fgenesh1_pg.C_scaffold_13000317	-	KOG2702 Predicted panthothenate kinase/uridine kinase-related protein	chr_6_2:279563-280354	83.1132	34.8952	1.25205	0.0164583	0.0274523
fgenesh1_pg.C_scaffold_13000318	-	-	chr_6_2:277125-277869	95.9552	12.8728	2.89804	0.0313043	0.0493549
fgenesh1_pg.C_scaffold_13000376	Ribosomal protein L3	KOG3141 Mitochondrial/chloroplast ribosomal protein L3	chr_6_2:34621-35614	243.893	121.919	1.00033	5.1e-09	1.58e-08
fgenesh1_pg.C_scaffold_14000003	-	KOG3156 Uncharacterized membrane protein	chr_6_1:683015-684100	177.079	87.5091	1.01689	1.2e-06	3.06e-06
fgenesh1_pg.C_scaffold_14000009	Mitochondrial substrate carrier;Ankyrin	KOG0758 Mitochondrial carnitine-acylcarnitine carrier protein	chr_6_1:704599-705795	300.018	46.8524	2.67885	0.00132512	0.00253138
fgenesh1_pg.C_scaffold_14000014	-	-	chr_6_1:717532-717886	61.5324	29.5555	1.05792	0.00594274	0.0104653
fgenesh1_pg.C_scaffold_14000029	-	-	chr_6_1:762390-762966	97.9786	43.3202	1.17743	0.0023728	0.0043536
fgenesh1_pg.C_scaffold_14000086	NUDIX hydrolase	KOG3041 Nucleoside diphosphate-sugar hydrolase of the MutT (NUDIX) family	chr_6_1:979980-980909	91.9525	42.2387	1.12232	0.00173372	0.00322151
fgenesh1_pg.C_scaffold_14000176	Cupin region	-	chr_6_1:1261603-1262175	836.123	48.9092	4.09554	1.22e-35	1.26e-34
fgenesh1_pg.C_scaffold_14000190	GCN5-related N-acetyltransferase	-	chr_6_1:1312418-1313331	51.3183	0.137987	8.5388	0.000203949	0.00042402
fgenesh1_pg.C_scaffold_14000194	-	-	chr_6_1:1319351-1320008	56.9144	0.243304	7.86989	5.22e-05	0.000115931
fgenesh1_pg.C_scaffold_14000231	SUR2-type hydroxylase/desaturase, catalytic region;Sterol desaturase	KOG0873 C-4 sterol methyl oxidase	chr_6_1:1456544-1457512	15069.1	2311.2	2.70488	2.48e-128	1.08e-126
fgenesh1_pg.C_scaffold_15000009	-	-	chr_2_1:29762-30438	301.921	99.1323	1.60674	0.0253772	0.041117
fgenesh1_pg.C_scaffold_15000013	-	KOG2428 Uncharacterized conserved protein	chr_2_1:45998-46836	123.345	13.0863	3.23657	0.00201508	0.00372302
fgenesh1_pg.C_scaffold_15000125	-	-	chr_2_1:409002-409387	2982.46	282.406	3.40066	1.29e-73	2.87e-72
fgenesh1_pg.C_scaffold_15000263	Phosphoesterase	-	chr_2_1:840361-841669	50.392	22.502	1.16314	0.0289165	0.045719
fgenesh1_pg.C_scaffold_15000268	-	-	chr_2_1:855171-855778	145.723	6.1653	4.56291	4.88e-08	1.41e-07
fgenesh1_pg.C_scaffold_15000297	E-class P450, group IV;Cytochrome P450	KOG0158 Cytochrome P450 CYP3/CYP5/CYP6/CYP9 subfamilies	chr_2_1:938678-940369	146.712	5.12328	4.83978	7.72e-09	2.37e-08
fgenesh1_pg.C_scaffold_15000298	-	-	chr_2_1:941007-941576	362.377	0.331004	10.0964	2.52e-34	2.52e-33
fgenesh1_pg.C_scaffold_15000299	B-class P450	KOG0157 Cytochrome P450 CYP4/CYP19/CYP26 subfamilies	chr_2_1:943534-944630	137.356	1.35674	6.66163	2.29e-11	8.41e-11
fgenesh1_pg.C_scaffold_16000043	Zn-finger, Tim10/DDP type	KOG3479 Mitochondrial import inner membrane translocase, subunit TIM9	chr_5_1:132913-133427	2331.39	415.061	2.4898	4.56e-12	1.76e-11
fgenesh1_pg.C_scaffold_16000064	-	-	chr_5_1:211459-211848	702.089	227.952	1.62292	0.00192478	0.00356272
fgenesh1_pg.C_scaffold_16000105	-	-	chr_5_1:319379-319690	1391.85	140.241	3.31102	5.05e-32	4.7e-31
fgenesh1_pg.C_scaffold_16000134	Human Rev interacting-like protein (hRIP)	KOG0704 ADP-ribosylation factor GTPase activator	chr_5_1:404420-405935	71.8474	29.6564	1.27659	0.0263524	0.0426285
fgenesh1_pg.C_scaffold_16000148	-	-	chr_5_1:454878-457755	245.666	27.2173	3.1741	1.13e-05	2.66e-05
fgenesh1_pg.C_scaffold_16000204	-	-	chr_5_1:637491-638318	294.557	47.8616	2.62161	0.00307231	0.00557009
fgenesh1_pg.C_scaffold_16000221	-	-	chr_5_1:695155-695999	321.221	32.9408	3.28562	3.15e-08	9.23e-08
fgenesh1_pg.C_scaffold_17000056	Alpha amylase, catalytic region;Alpha amylase, catalytic subdomain;Glycoside hydrolase family 13	KOG0471 Alpha-amylase	chr_6_2:1712021-1718021	114.075	15.1012	2.91725	0.0219307	0.0357513
fgenesh1_pg.C_scaffold_18000111	-	-	chr_5_3:274015-274854	60.3058	2.77069	4.44398	0.000855598	0.00166251
fgenesh1_pg.C_scaffold_19000021	Short-chain dehydrogenase/reductase SDR;Glucose/ribitol dehydrogenase	KOG0725 Reductases with broad range of substrate specificities	chr_6_1:601092-601919	88.5463	7.99928	3.46849	0.00217582	0.00400165
fgenesh1_pg.C_scaffold_19000099	Eggshell protein	KOG4211 Splicing factor hnRNP-F and related RNA-binding proteins	chr_6_1:369487-370071	1821.38	10.0142	7.50684	2.52e-159	1.37e-157
fgenesh1_pg.C_scaffold_19000133	Aminotransferase, class I and II;Aspartate/other aminotransferase	KOG1412 Aspartate aminotransferase/Glutamic oxaloacetic transaminase AAT2/GOT1	chr_6_1:269703-271209	44.0288	2.82139	3.96397	0.0114376	0.0193501
fgenesh1_pg.C_scaffold_19000173	FAD linked oxidase, N-terminal	KOG1231 Proteins containing the FAD binding domain	chr_6_1:146569-148177	55.3322	24.6181	1.1684	0.0258738	0.0418745
fgenesh1_pg.C_scaffold_19000189	-	-	chr_6_1:98037-98650	789.044	64.805	3.60593	1.54e-24	1.11e-23
fgenesh1_pg.C_scaffold_20000028	NUDIX hydrolase	KOG4548 Mitochondrial ribosomal protein L17	chr_6_3:252630-253764	151.627	68.0862	1.15509	0.000147867	0.000311734
fgenesh1_pg.C_scaffold_20000064	Aminotransferase, class IV	KOG0975 Branched chain aminotransferase BCAT1, pyridoxal phosphate enzymes type IV superfamily	chr_6_3:149502-150485	265.13	7.79553	5.08791	2.69e-17	1.4e-16
fgenesh1_pg.C_scaffold_20000103	-	KOG3575 FOG: Hormone receptors	chr_6_3:34614-35092	8952.02	31.1005	8.16913	0	0
fgenesh1_pg.C_scaffold_2000067	Cutinase;Cutinase, monofunctional	KOG4157 beta-1,6-N-acetylglucosaminyltransferase, contains WSC domain	chr_4_2:224135-225182	121.611	1e-05	23.5358	4.76e-11	1.71e-10
fgenesh1_pg.C_scaffold_2000107	-	KOG1878 Nuclear receptor coregulator SMRT/SMRTER, contains Myb-like domains	chr_4_2:350730-351219	29.8542	0.471829	5.98353	0.0128642	0.0216113
fgenesh1_pg.C_scaffold_2000143	NUDIX hydrolase	KOG2839 Diadenosine and diphosphoinositol polyphosphate phosphohydrolase	chr_4_2:486021-486645	58.1947	28.9519	1.00723	0.00503414	0.00890411
fgenesh1_pg.C_scaffold_2000202	Enoyl-CoA hydratase/isomerase	KOG1680 Enoyl-CoA hydratase	chr_4_2:733326-734426	174.902	67.208	1.37984	0.00396828	0.0071405
fgenesh1_pg.C_scaffold_2000216	Protein of unknown function DUF392	KOG4071 Uncharacterized conserved protein	chr_4_2:774842-775788	61.0462	5.75262	3.40761	0.0154742	0.0258407
fgenesh1_pg.C_scaffold_2000259	Protein of unknown function UPF0143	KOG3455 Predicted membrane protein	chr_4_2:927969-928469	304.929	32.6657	3.22262	3.05e-07	8.19e-07
fgenesh1_pg.C_scaffold_2000263	-	-	chr_4_2:947038-947448	49.5482	1.00701	5.62068	0.00149339	0.00282178
fgenesh1_pg.C_scaffold_2000290	-	-	chr_4_2:1057188-1057609	85.4654	8.39168	3.34831	0.00697503	0.0121957
fgenesh1_pg.C_scaffold_2000410	-	-	chr_4_2:1464507-1464927	69.1413	7.76423	3.15463	0.0242794	0.0394462
fgenesh1_pg.C_scaffold_2000509	Peptidase aspartic, active site;Peptidase A1, pepsin	KOG1339 Aspartyl protease	chr_4_2:1815803-1817203	2602.59	820.001	1.66625	1.32e-07	3.65e-07
fgenesh1_pg.C_scaffold_2000512	-	-	chr_4_2:1821049-1821735	366.844	49.9559	2.87644	1.05e-05	2.48e-05
fgenesh1_pg.C_scaffold_2000565	-	KOG4157 beta-1,6-N-acetylglucosaminyltransferase, contains WSC domain	chr_4_2:2008164-2009058	46.6225	1.12916	5.3677	0.00217265	0.00399654
fgenesh1_pg.C_scaffold_2000603	-	-	chr_4_2:2121955-2122523	2698.08	953.251	1.50101	1.91e-17	9.96e-17
fgenesh1_pg.C_scaffold_2000717	-	-	chr_4_2:2579325-2580091	202.116	1e-05	24.2687	6.45e-19	3.62e-18
fgenesh1_pg.C_scaffold_2000804	Protein of unknown function UPF0047	KOG3267 Uncharacterized conserved protein	chr_4_2:2876307-2876811	727.007	122.117	2.57371	1.31e-05	3.07e-05
fgenesh1_pg.C_scaffold_2000849	-	-	chr_4_2:3037439-3038341	158.057	21.4812	2.8793	0.00537984	0.00950388
fgenesh1_pg.C_scaffold_2000857	-	-	chr_4_2:3056285-3056606	1197.09	106.447	3.49132	5.58e-33	5.39e-32
fgenesh1_pg.C_scaffold_2000882	Helix-turn-helix motif	KOG3398 Transcription factor MBF1	chr_4_2:3129764-3130309	1870.57	735.364	1.34695	3.43e-22	2.2e-21
fgenesh1_pg.C_scaffold_2000893	Transcription elongation factor S-II, N-terminal;Transcription factor TFIIS;Transcription elongation factor S-II, central region;Transcription elongation factor S-II	KOG1105 Transcription elongation factor TFIIS/Cofactor of enhancer-binding protein Sp1	chr_4_2:3158672-3159583	85.5161	34.1532	1.32418	0.023198	0.0377502
fgenesh1_pg.C_scaffold_2000958	-	-	chr_4_2:3356871-3357334	1255.38	8.18578	7.26079	4.97e-108	1.69e-106
fgenesh1_pg.C_scaffold_2001046	Riboflavin kinase / FAD synthetase	KOG3110 Riboflavin kinase	chr_4_2:3645742-3646500	467.203	75.1078	2.63701	0.000181216	0.000379419
fgenesh1_pg.C_scaffold_21000043	-	-	chr_3_3:135034-135795	88.7445	5.95123	3.8984	0.000281379	0.000574797
fgenesh1_pg.C_scaffold_21000080	-	-	chr_3_3:28515-29363	421.877	3.89903	6.75756	1.18e-35	1.23e-34
fgenesh1_pg.C_scaffold_24000037	-	-	chr_4_3:110397-112146	208.642	25.1657	3.0515	0.000240444	0.000497228
fgenesh1_pg.C_scaffold_3000044	-	-	chr_8_2:3160702-3161046	176.825	0.979274	7.49639	2.02e-16	1.01e-15
fgenesh1_pg.C_scaffold_3000057	Short-chain dehydrogenase/reductase SDR;Glucose/ribitol dehydrogenase	KOG1207 Diacetyl reductase/L-xylulose reductase	chr_8_2:3130809-3131762	58.0069	5.6853	3.35092	0.0293163	0.0463075
fgenesh1_pg.C_scaffold_3000083	-	-	chr_8_2:3037955-3038572	4369.81	3.96425	10.1063	0	0
fgenesh1_pg.C_scaffold_3000157	-	-	chr_8_2:2829706-2830849	437.846	211.256	1.05143	2.14e-13	8.94e-13
fgenesh1_pg.C_scaffold_3000182	Mitochondrial import inner membrane translocase, subunit Tim17/22	KOG3225 Mitochondrial import inner membrane translocase, subunit TIM22	chr_8_2:2736983-2737776	997.645	168.002	2.57005	3.9e-07	1.04e-06
fgenesh1_pg.C_scaffold_3000203	BolA-like protein	KOG3348 BolA (bacterial stress-induced morphogen)-related protein	chr_8_2:2657656-2658149	355.23	56.4911	2.65266	0.000743957	0.00145118
fgenesh1_pg.C_scaffold_3000204	Alkyl hydroperoxide reductase/ Thiol specific antioxidant/ Mal allergen	KOG0541 Alkyl hydroperoxide reductase/peroxiredoxin	chr_8_2:2656543-2657392	508.363	58.9829	3.10749	3.86e-10	1.3e-09
fgenesh1_pg.C_scaffold_3000214	Rhomboid-like protein	KOG2890 Predicted membrane protein	chr_8_2:2619719-2620897	204.997	76.5118	1.42185	0.00475784	0.00847493
fgenesh1_pg.C_scaffold_3000402	Short-chain dehydrogenase/reductase SDR;Glucose/ribitol dehydrogenase	KOG0725 Reductases with broad range of substrate specificities	chr_8_2:2031806-2032823	283.403	15.4733	4.195	2.44e-13	1.01e-12
fgenesh1_pg.C_scaffold_3000423	-	KOG0981 DNA topoisomerase I	chr_8_2:1976557-1977093	63.2512	1e-05	22.5927	1.52e-05	3.55e-05
fgenesh1_pg.C_scaffold_3000500	-	-	chr_8_2:1714609-1715635	180.559	4.85327	5.21737	1.65e-12	6.53e-12
fgenesh1_pg.C_scaffold_3000583	Brix	KOG2781 U3 small nucleolar ribonucleoprotein (snoRNP) component	chr_8_2:1435062-1436235	62.399	30.6256	1.02678	0.00432689	0.0077484
fgenesh1_pg.C_scaffold_3000622		-	chr_8_2:1302876-1304085	325.435	108.364	1.58648	0.0168911	0.028137
fgenesh1_pg.C_scaffold_3000745	-	-	chr_8_2:895745-896222	942.744	185.129	2.34834	0.00126833	0.00242702
fgenesh1_pg.C_scaffold_3000841	Vesicle transport v-SNARE	KOG3208 SNARE protein GS28	chr_8_2:582015-582846	144.141	52.5634	1.45535	0.0269299	0.0435557
fgenesh1_pg.C_scaffold_3000880	Protein of unknown function UPF0261	-	chr_8_2:433645-434935	53.0353	3.57384	3.89141	0.00832774	0.0142541
fgenesh1_pg.C_scaffold_3000886	-	-	chr_8_2:417400-417933	577.522	78.6626	2.87613	2.76e-08	8.1e-08
fgenesh1_pg.C_scaffold_3000925	Serine/threonine protein kinase;Protein kinase	KOG1290 Serine/threonine protein kinase	chr_8_2:295923-297342	181.525	12.6165	3.84678	1.63e-07	4.52e-07
fgenesh1_pg.C_scaffold_3000939	GCN5-related N-acetyltransferase	KOG3235 Subunit of the major N alpha-acetyltransferase	chr_8_2:246583-247463	228.95	108.88	1.07229	2.21e-07	6.07e-07
fgenesh1_pg.C_scaffold_3000948	-	KOG4580 Component of vacuolar transporter chaperone (Vtc) involved in vacuole fusion	chr_8_2:226783-227214	1137.03	27.844	5.35176	1.13e-75	2.57e-74
fgenesh1_pg.C_scaffold_3000995	-	-	chr_8_2:95782-96533	11339.4	1230.64	3.20386	3.23e-222	2.56e-220
fgenesh1_pg.C_scaffold_4000103	-	KOG1187 Serine/threonine protein kinase	chr_7_1:345145-346589	72.8177	7.96177	3.19313	0.0181907	0.02996
fgenesh1_pg.C_scaffold_4000161	-	-	chr_7_1:557178-557591	117.82	6.4252	4.1967	5.99e-06	1.44e-05
fgenesh1_pg.C_scaffold_4000172	Homogentisate 1,2-dioxygenase	KOG1417 Homogentisate 1,2-dioxygenase	chr_7_1:582797-584347	56.2667	26.7325	1.07369	0.0096319	0.0164222
fgenesh1_pg.C_scaffold_4000274	Short-chain dehydrogenase/reductase SDR;Glucose/ribitol dehydrogenase	KOG0725 Reductases with broad range of substrate specificities	chr_7_1:909370-910359	196.248	74.0672	1.40577	0.00403901	0.00726646
fgenesh1_pg.C_scaffold_4000541	-	KOG1878 Nuclear receptor coregulator SMRT/SMRTER, contains Myb-like domains	chr_7_1:1728364-1728859	48.4359	1e-05	22.2076	0.00029096	0.000593769
fgenesh1_pg.C_scaffold_4000608	Ribosomal protein L33	KOG3505 Mitochondrial/chloroplast ribosomal protein L33-like	chr_7_1:1939425-1939925	533.347	79.7141	2.74217	3.55e-06	8.76e-06
fgenesh1_pg.C_scaffold_4000633	Eukaryotic protein of unknown function DUF953;Thioredoxin domain 2;Thioredoxin-related	KOG3425 Uncharacterized conserved protein	chr_7_1:2014577-2015125	930.602	57.906	4.00638	1.21e-37	1.33e-36
fgenesh1_pg.C_scaffold_4000712	CTLH, C-terminal to LisH motif	KOG2659 LisH motif-containing protein	chr_7_1:2273289-2274197	575.006	216.804	1.40719	1.72e-06	4.33e-06
fgenesh1_pg.C_scaffold_4000715	DNA-directed RNA polymerase, M/15 kDa subunit;Transcription factor TFIIS	KOG2907 RNA polymerase I transcription factor TFIIS, subunit A12.2/RPA12	chr_7_1:2288506-2289018	48.635	22.3153	1.12396	0.0184728	0.0303699
fgenesh1_pg.C_scaffold_4000819	-	-	chr_7_1:2604534-2605263	50.8597	1.97543	4.68628	0.00097883	0.00188848
fgenesh1_pg.C_scaffold_4000872	Protein-L-isoaspartate(D-aspartate) O-methyltransferase;SAM (and some other nucleotide) binding motif	KOG1661 Protein-L-isoaspartate(D-aspartate) O-methyltransferase	chr_7_1:2786294-2787233	184.958	66.758	1.47019	0.0150544	0.0251774
fgenesh1_pg.C_scaffold_5000033	-	KOG0123 Polyadenylate-binding protein (RRM superfamily)	chr_4_1:2350897-2351445	639.87	129.432	2.30558	0.019672	0.0322888
fgenesh1_pg.C_scaffold_5000096	Manganese and iron superoxide dismutase	KOG0876 Manganese superoxide dismutase	chr_4_1:2150133-2151221	425.382	76.332	2.4784	0.00466333	0.0083154
fgenesh1_pg.C_scaffold_5000172	-	-	chr_4_1:1844281-1844758	386.729	73.1744	2.40191	0.0237685	0.0386536
fgenesh1_pg.C_scaffold_5000211	-	-	chr_4_1:1707744-1708442	133.334	61.989	1.10496	0.000172789	0.000362002
fgenesh1_pg.C_scaffold_5000244	Yippee-like protein	KOG3399 Predicted Yippee-type zinc-binding protein	chr_4_1:1594797-1595197	149.313	64.8681	1.20276	0.000636997	0.00125322
fgenesh1_pg.C_scaffold_5000285	SUR7	-	chr_4_1:1465974-1466802	336.47	49.9402	2.7522	0.000183346	0.000382607
fgenesh1_pg.C_scaffold_5000290	E-class P450, group IV;Cytochrome P450	KOG0158 Cytochrome P450 CYP3/CYP5/CYP6/CYP9 subfamilies	chr_4_1:1452459-1454083	155.507	8.76546	4.14901	1.04e-07	2.9e-07
fgenesh1_pg.C_scaffold_5000308	-	KOG4157 beta-1,6-N-acetylglucosaminyltransferase, contains WSC domain	chr_4_1:1394087-1394508	77.7112	4.75128	4.03173	0.000522813	0.00103586
fgenesh1_pg.C_scaffold_5000310	-	KOG0118 FOG: RRM domain	chr_4_1:1385659-1386281	51.7919	24.7697	1.06415	0.0105924	0.0180261
fgenesh1_pg.C_scaffold_5000340	Signal recognition particle, 14 kDa protein	KOG1761 Signal recognition particle, subunit Srp14	chr_4_1:1299964-1300419	467.792	86.8755	2.42885	0.00603213	0.0106208
fgenesh1_pg.C_scaffold_5000362	-	-	chr_4_1:1236230-1236740	183.717	18.7294	3.29411	3.57e-05	8.02e-05
fgenesh1_pg.C_scaffold_5000365	-	-	chr_4_1:1231660-1231994	129.121	1.00034	7.01209	1.28e-10	4.49e-10
fgenesh1_pg.C_scaffold_5000401	-	-	chr_4_1:1105923-1106867	207.857	73.5162	1.49946	0.0145263	0.0243183
fgenesh1_pg.C_scaffold_5000498	-	-	chr_4_1:745547-746307	95.5142	4.49964	4.40783	1.88e-05	4.34e-05
fgenesh1_pg.C_scaffold_5000505	Succinate dehydrogenase, cytochrome b subunit	KOG0449 Succinate dehydrogenase, cytochrome b subunit	chr_4_1:719174-719935	887.57	317.659	1.48238	3.46e-07	9.23e-07
fgenesh1_pg.C_scaffold_5000506	Transaldolase	KOG2772 Transaldolase	chr_4_1:715383-716788	58.8454	25.1797	1.22467	0.0218147	0.0355796
fgenesh1_pg.C_scaffold_5000519	Peptidase M22, glycoprotease	KOG2707 Predicted metalloprotease with chaperone activity (RNAse H/HSP70 fold)	chr_4_1:673966-676098	202.492	16.9243	3.5807	5.3e-07	1.4e-06
fgenesh1_pg.C_scaffold_5000549	-	KOG0504 FOG: Ankyrin repeat	chr_4_1:544968-546735	132.143	1e-05	23.6556	3.3e-12	1.29e-11
fgenesh1_pg.C_scaffold_5000556	Gonadotropin, beta chain	-	chr_4_1:518141-519379	117.481	7.16355	4.03561	1.95e-05	4.5e-05
fgenesh1_pg.C_scaffold_5000598	-	-	chr_4_1:370771-371156	111.023	12.1473	3.19215	0.00508744	0.00899365
fgenesh1_pg.C_scaffold_5000600	-	-	chr_4_1:365770-366730	127.115	5.37756	4.56304	2.49e-07	6.76e-07
fgenesh1_pg.C_scaffold_5000644	Aldehyde dehydrogenase;Whey acidic protein, core region;Glycoside hydrolase, family 16	-	chr_4_1:239256-240567	102.283	1.00998	6.6621	3.11e-08	9.11e-08
fgenesh1_pg.C_scaffold_5000647	Glutathione S-transferase, N-terminal	KOG0406 Glutathione S-transferase	chr_4_1:228682-229461	463.342	35.4429	3.70851	6.76e-16	3.26e-15
fgenesh1_pg.C_scaffold_5000659	Peptidase aspartic, active site;Peptidase A1, pepsin	KOG1339 Aspartyl protease	chr_4_1:196411-197249	548.924	17.2108	4.99522	2.67e-33	2.61e-32
fgenesh1_pg.C_scaffold_6000073	Complex 1 LYR protein	KOG3426 NADH:ubiquinone oxidoreductase, NDUFA6/B14 subunit	chr_3_4:212674-213488	1782.8	206.933	3.10691	3.65e-32	3.43e-31
fgenesh1_pg.C_scaffold_6000074	RNA polymerase, dimerisation;DNA-directed RNA polymerase, 13 to 16 kDa subunit	KOG3438 DNA-directed RNA polymerase, subunit L	chr_3_4:214076-214726	70.9647	35.3949	1.00356	0.00109446	0.00210351
fgenesh1_pg.C_scaffold_6000088	Parvalbumin;Calcium-binding EF-hand	KOG0034 Ca2+/calmodulin-dependent protein phosphatase (calcineurin subunit B), EF-Hand superfamily protein	chr_3_4:258206-259060	1237.7	176.138	2.81288	1.7e-14	7.61e-14
fgenesh1_pg.C_scaffold_6000194	-	-	chr_3_4:597173-598651	317.577	15.131	4.39153	6.69e-16	3.23e-15
fgenesh1_pg.C_scaffold_6000200	-	-	chr_3_4:617873-618279	780.638	80.6147	3.27554	5.76e-18	3.07e-17
fgenesh1_pg.C_scaffold_6000229	Beta-Ig-H3/fasciclin	KOG1437 Fasciclin and related adhesion glycoproteins	chr_3_4:687308-688490	308.038	3.55543	6.43694	3.96e-25	2.9e-24
fgenesh1_pg.C_scaffold_6000273	-	KOG4009 NADH-ubiquinone oxidoreductase, subunit NDUFB10/PDSW	chr_3_4:839893-840333	3011.18	519.053	2.53638	1.62e-17	8.47e-17
fgenesh1_pg.C_scaffold_6000370	-	-	chr_3_4:1141201-1141776	123.307	1.32007	6.5455	4.66e-10	1.57e-09
fgenesh1_pg.C_scaffold_6000465	-	-	chr_3_4:1448900-1449409	266.266	110.079	1.27433	2.91e-05	6.56e-05
fgenesh1_pg.C_scaffold_6000538	Guanine-specific ribonuclease N1 and T1	-	chr_3_4:1686095-1686494	1706.99	1.31502	10.3422	6.98e-164	3.88e-162
fgenesh1_pg.C_scaffold_6000580	-	-	chr_3_4:1827515-1828076	6878.51	1048.16	2.71424	1.38e-60	2.52e-59
fgenesh1_pg.C_scaffold_6000585	-	-	chr_3_4:1837741-1838215	1882.06	678.353	1.4722	3.91e-14	1.72e-13
fgenesh1_pg.C_scaffold_7000008	SAM (and some other nucleotide) binding motif	-	chr_5_2:1756803-1757597	2235.52	17.0789	7.03225	1.04e-188	6.93e-187
fgenesh1_pg.C_scaffold_7000071	Heavy metal binding;Copper/Zinc superoxide dismutase;Heavy metal transport/detoxification protein	KOG4656 Copper chaperone for superoxide dismutase	chr_5_2:1547865-1548776	121.492	46.5601	1.3837	0.0211427	0.0345003
fgenesh1_pg.C_scaffold_7000077	Rhodanese-like	KOG3772 M-phase inducer phosphatase	chr_5_2:1536553-1537050	522.148	24.7948	4.39635	4.2e-26	3.23e-25
fgenesh1_pg.C_scaffold_7000203	Protein of unknown function DUF125	KOG4473 Uncharacterized membrane protein	chr_5_2:1132189-1133149	301.527	14.3518	4.39298	3.53e-15	1.64e-14
fgenesh1_pg.C_scaffold_7000266	-	-	chr_5_2:940191-940976	29.3517	0.534279	5.77971	0.0128642	0.0216113
fgenesh1_pg.C_scaffold_7000420	-	KOG4554 Protein involved in inorganic phosphate transport	chr_5_2:413119-413843	1650.15	308.863	2.41756	3.53e-07	9.42e-07
fgenesh1_pg.C_scaffold_7000493	Gelsolin;Gelsolin region	KOG0443 Actin regulatory proteins (gelsolin/villin family)	chr_5_2:198463-199636	58.4931	25.7364	1.18446	0.0218147	0.0355796
fgenesh1_pg.C_scaffold_7000498	-	-	chr_5_2:189514-190118	41.7476	20.2175	1.04609	0.0173612	0.0288913
fgenesh1_pg.C_scaffold_8000025	-	KOG4841 Dolichol-phosphate mannosyltransferase, subunit 3	chr_1_2:76853-77330	456.439	44.6571	3.35346	7.69e-12	2.94e-11
fgenesh1_pg.C_scaffold_8000209	Leucine-rich repeat	KOG1644 U2-associated snRNP A' protein	chr_1_2:607812-608830	202.965	33.852	2.58392	0.0233995	0.0380719
fgenesh1_pg.C_scaffold_8000217	-	-	chr_1_2:638208-638582	1672.66	478.989	1.80408	0.0242689	0.0394354
fgenesh1_pg.C_scaffold_8000230	Necrosis inducing	-	chr_1_2:675145-675974	212.927	0.226864	9.87432	7.06e-20	4.12e-19
fgenesh1_pg.C_scaffold_8000304	-	-	chr_1_2:900398-901825	98.634	3.51854	4.80904	3.26e-06	8.07e-06
fgenesh1_pg.C_scaffold_8000315		-	chr_1_2:931835-932250	345.618	26.5078	3.70469	4.28e-12	1.66e-11
fgenesh1_pg.C_scaffold_8000366	Pectate lyase/Amb allergen	-	chr_1_2:1083159-1084514	70.2198	1.17983	5.89523	2.63e-05	5.95e-05
fgenesh1_pg.C_scaffold_8000424	RNA-binding region RNP-1 (RNA recognition motif)	KOG0533 RRM motif-containing protein	chr_1_2:1272476-1274422	578.111	215.061	1.4266	3.38e-06	8.37e-06
fgenesh1_pg.C_scaffold_8000509	Transport protein particle (TRAPP) component, Bet3	KOG3315 Transport protein particle (TRAPP) complex subunit	chr_1_2:1533810-1534650	122.468	58.396	1.06846	0.000135219	0.000285606
fgenesh1_pg.C_scaffold_8000513	Small nuclear ribonucleoprotein (Sm protein);snRNP	KOG3459 Small nuclear ribonucleoprotein (snRNP) Sm core protein	chr_1_2:1542688-1543467	539.337	96.3531	2.48478	0.00133182	0.00252691
fgenesh1_pg.C_scaffold_8000548	Glutathione S-transferase, N-terminal;Glutathione S-transferase, C-terminal	KOG0867 Glutathione S-transferase	chr_1_2:1655787-1656464	64.1854	4.81683	3.73609	0.00427047	0.0076528
fgenesh1_pg.C_scaffold_88000001	Partner of SLD five, PSF3	KOG1106 Uncharacterized conserved protein	chr_6_2:1217800-1218630	85.7184	8.50049	3.33399	0.00697503	0.0121957
fgenesh1_pg.C_scaffold_9000008	Phosphoribosyltransferase	KOG4203 Armadillo/beta-Catenin/plakoglobin	chr_3_2:1661216-1661882	182.006	1.44939	6.9724	1.04e-15	4.96e-15
fgenesh1_pg.C_scaffold_9000029	-	-	chr_3_2:1610329-1610782	346.611	13.6689	4.66435	1.88e-19	1.08e-18
fgenesh1_pg.C_scaffold_9000065	-	KOG1721 FOG: Zn-finger	chr_3_2:1491030-1491868	81.826	40.3854	1.01873	0.000684521	0.00133861
fgenesh1_pg.C_scaffold_9000084	E-class P450, group I;Cytochrome P450	KOG0158 Cytochrome P450 CYP3/CYP5/CYP6/CYP9 subfamilies	chr_3_2:1428277-1429978	239.624	82.2253	1.54312	0.0184573	0.0303494
fgenesh1_pg.C_scaffold_9000143	Ctr copper transporter	KOG3386 Copper transporter	chr_3_2:1244647-1245279	518.011	27.4052	4.24046	4.96e-24	3.51e-23
fgenesh1_pg.C_scaffold_9000145	-	-	chr_3_2:1240680-1241162	826.5	268.071	1.6244	0.000619916	0.0012208
fgenesh1_pg.C_scaffold_9000210	-	-	chr_3_2:1042353-1042760	294.024	14.7441	4.31772	1.05e-14	4.76e-14
fgenesh1_pg.C_scaffold_9000213	-	-	chr_3_2:1036501-1037089	72.9567	3.59088	4.34463	0.00031684	0.000645404
fgenesh1_pg.C_scaffold_9000216	Guanine-specific ribonuclease N1 and T1	-	chr_3_2:1030489-1030882	22756.9	16.1854	10.4574	0	0
fgenesh1_pg.C_scaffold_9000268	-	-	chr_3_2:881801-882474	988.126	124.68	2.98646	1.02e-15	4.86e-15
fgenesh1_pg.C_scaffold_9000365	-	-	chr_3_2:600359-600702	445.305	149.479	1.57485	0.00366051	0.00660322
fgenesh1_pg.C_scaffold_9000442	WW/Rsp5/WWP;PpiC-type peptidyl-prolyl cis-trans isomerase	KOG3259 Peptidyl-prolyl cis-trans isomerase	chr_3_2:370139-370800	563.297	82.8367	2.76555	9.1e-07	2.38e-06
fgenesh1_pm.C_scaffold_10000016	Peptidylprolyl isomerase, FKBP-type	KOG0544 FKBP-type peptidyl-prolyl cis-trans isomerase	chr_8_1:181738-182448	386.661	73.0122	2.40486	0.0237685	0.0386536
fgenesh1_pm.C_scaffold_10000149	Lumazine-binding protein	KOG3310 Riboflavin synthase alpha chain	chr_8_1:1201685-1202655	387.047	64.4314	2.58667	0.00128528	0.00245759
fgenesh1_pm.C_scaffold_10000194	ArgE/dapE/ACY1/CPG2/yscS;Peptidase M20	KOG2275 Aminoacylase ACY1 and related metalloexopeptidases	chr_8_1:1460165-1461414	65.9828	30.2298	1.12612	0.00743434	0.0127879
fgenesh1_pm.C_scaffold_1000033	Ribosomal protein S8	KOG1754 40S ribosomal protein S15/S22	chr_2_2:3525384-3526054	2438.06	401.594	2.60192	2.43e-17	1.26e-16
fgenesh1_pm.C_scaffold_1000122	-	-	chr_2_2:3025517-3026357	481.401	1.92493	7.96629	2.37e-44	3.08e-43
fgenesh1_pm.C_scaffold_1000155	Peptidase M24, methionine aminopeptidase;Peptidase M24;Peptidase M24A, methionine aminopeptidase, subfamily 1	KOG2738 Putative methionine aminopeptidase	chr_2_2:2810397-2811758	72.9744	3.02278	4.59344	0.00031684	0.000645404
fgenesh1_pm.C_scaffold_1000177	Cytochrome b5	KOG1108 Predicted heme/steroid binding protein	chr_2_2:2676615-2677444	223.315	103.18	1.11392	1.25e-06	3.16e-06
fgenesh1_pm.C_scaffold_1000250	ORMDL	KOG3319 Predicted membrane protein	chr_2_2:2283317-2284082	868.481	159.22	2.44747	0.000120738	0.000256256
fgenesh1_pm.C_scaffold_1000284	-	-	chr_2_2:2114676-2115176	391.372	51.2376	2.93327	2.73e-06	6.8e-06
fgenesh1_pm.C_scaffold_1000288	HAD-superfamily subfamily IB hydrolase, hypothetical 1;HAD-superfamily hydrolase, subfamily IB (PSPase-like)	-	chr_2_2:2087499-2088555	510.778	49.5014	3.36716	3.52e-13	1.45e-12
fgenesh1_pm.C_scaffold_1000358	ZIP zinc/iron transport;Zinc transporter ZIP	KOG1558 Fe2+/Zn2+ regulated transporter	chr_2_2:1716452-1717509	207.669	23.473	3.14521	7.83e-05	0.000170654
fgenesh1_pm.C_scaffold_1000390	-	-	chr_2_2:1526243-1526756	407.583	78.9141	2.36874	0.0277643	0.0448836
fgenesh1_pm.C_scaffold_1000427	-	KOG2599 Pyridoxal/pyridoxine/pyridoxamine kinase	chr_2_2:1341312-1342479	66.333	27.8366	1.25274	0.0300218	0.0473847
fgenesh1_pm.C_scaffold_1000623	-	KOG2992 Nucleolar GTPase/ATPase p130	chr_2_2:163723-164562	56.0818	0.170568	8.36104	5.22e-05	0.000115931
fgenesh1_pm.C_scaffold_11000038	Peptidase M18, aminopeptidase I	KOG2596 Aminopeptidase I zinc metalloprotease (M18)	chr_1_1:1458757-1460308	117.302	56.7544	1.04742	0.000146119	0.000308114
fgenesh1_pm.C_scaffold_11000044	-	-	chr_1_1:1432875-1433304	705.253	52.0976	3.75885	2.39e-24	1.71e-23
fgenesh1_pm.C_scaffold_11000107	Major facilitator superfamily;General substrate transporter;Sugar transporter superfamily;Sugar transporter	KOG0569 Permease of the major facilitator superfamily	chr_1_1:1077132-1078412	105.958	45.3503	1.22431	0.00331482	0.00598604
fgenesh1_pm.C_scaffold_11000131	Ubiquitin-conjugating enzymes	KOG0420 Ubiquitin-protein ligase	chr_1_1:939966-940798	434.76	146.235	1.57193	0.00383003	0.00690035
fgenesh1_pm.C_scaffold_11000153	Glutathione-dependent formaldehyde-activating, GFA	-	chr_1_1:848609-849148	189.185	31.7683	2.57414	0.0297495	0.0469698
fgenesh1_pm.C_scaffold_11000241	-	-	chr_1_1:175274-175747	2870.92	7.71772	8.53912	1.17e-265	1.22e-263
fgenesh1_pm.C_scaffold_12000077	Histidine acid phosphatase	KOG1382 Multiple inositol polyphosphate phosphatase	chr_3_1:723132-724837	90.2425	9.10932	3.30839	0.00878034	0.0150109
fgenesh1_pm.C_scaffold_13000088	Aldo/keto reductase	KOG1577 Aldo/keto reductase family proteins	chr_6_2:694480-695779	181.98	16.9951	3.42059	8.68e-06	2.06e-05
fgenesh1_pm.C_scaffold_13000131	Peptidase M48, Ste24p;Peptidase M, neutral zinc metallopeptidases, zinc-binding site	KOG2719 Metalloprotease	chr_6_2:531573-533138	294.22	97.5294	1.59299	0.0238801	0.0388162
fgenesh1_pm.C_scaffold_13000173	Ubiquitin-conjugating enzymes	KOG0424 Ubiquitin-protein ligase	chr_6_2:351589-352316	84.4214	33.0252	1.35404	0.0298358	0.0470986
fgenesh1_pm.C_scaffold_13000183	-	KOG4157 beta-1,6-N-acetylglucosaminyltransferase, contains WSC domain	chr_6_2:314396-315721	4042.14	1361.05	1.5704	2.18e-18	1.19e-17
fgenesh1_pm.C_scaffold_13000229	-	KOG2793 Putative N2,N2-dimethylguanosine tRNA methyltransferase	chr_6_2:15289-16074	156.959	22.4141	2.80791	0.0119739	0.0202065
fgenesh1_pm.C_scaffold_14000075	Protein of unknown function UPF0067;GAF	-	chr_6_1:1137597-1138851	199.895	27.3835	2.86786	0.00219596	0.00403574
fgenesh1_pm.C_scaffold_14000134	Cytidine deaminase, homotetrameric;Cytidine/deoxycytidylate deaminase, zinc-binding region	KOG0833 Cytidine deaminase	chr_6_1:1580869-1581683	1062.46	139.011	2.93414	2.78e-15	1.3e-14
fgenesh1_pm.C_scaffold_15000040	Tropomyosin	KOG1003 Actin filament-coating protein tropomyosin	chr_2_1:189632-190196	1924.68	692.093	1.47558	2.4e-14	1.07e-13
fgenesh1_pm.C_scaffold_15000085	RNA-binding region RNP-1 (RNA recognition motif);Generic methyltransferase	KOG4300 Predicted methyltransferase	chr_2_1:482350-483471	117.454	6.57803	4.1583	5.99e-06	1.44e-05
fgenesh1_pm.C_scaffold_16000046	Emopamil-binding	KOG4826 C-8,7 sterol isomerase	chr_5_1:311404-312263	599.775	38.9508	3.9447	7.18e-24	5.07e-23
fgenesh1_pm.C_scaffold_17000006	Peptidase M48, Ste24p;Peptidase M, neutral zinc metallopeptidases, zinc-binding site	KOG2661 Peptidase family M48	chr_6_2:1837393-1838208	185.966	66.9014	1.47493	0.0186681	0.030686
fgenesh1_pm.C_scaffold_17000058	Ribosomal protein L30, bacterial	-	chr_6_2:1562092-1562379	1972.58	96.2109	4.35774	3.05e-93	8.52e-92
fgenesh1_pm.C_scaffold_19000022	Amino acid permease;Amino acid permease-associated region;Amino acid/polyamine transporter I	KOG1286 Amino acid transporters	chr_6_1:351050-352826	79.0684	7.25331	3.44639	0.00748607	0.0128747
fgenesh1_pm.C_scaffold_20000054	-	KOG2504 Monocarboxylate transporter	chr_6_3:79146-80532	111.661	7.15665	3.9637	5.56e-05	0.000123069
fgenesh1_pm.C_scaffold_2000089	Peptidase S10, serine carboxypeptidase;Esterase/lipase/thioesterase	KOG1282 Serine carboxypeptidases (lysosomal cathepsin A)	chr_4_2:1202612-1204438	2358.41	51.9659	5.50411	6.04e-161	3.3e-159
fgenesh1_pm.C_scaffold_2000156	Ras GTPase;ARF/SAR superfamily;ADP-ribosylation factor;Small GTP-binding protein domain;GTP-binding protein SAR1;Ras small GTPase, Rab type	KOG0071 GTP-binding ADP-ribosylation factor Arf6 (dArf3)	chr_4_2:1968922-1969728	386.267	161.542	1.25769	3e-07	8.05e-07
fgenesh1_pm.C_scaffold_2000234	-	-	chr_4_2:2903132-2904531	45.4928	1.12716	5.33487	0.0033304	0.00601203
fgenesh1_pm.C_scaffold_2000262	-	-	chr_4_2:3147412-3148050	396.408	47.0547	3.07458	1.27e-07	3.52e-07
fgenesh1_pm.C_scaffold_2000292	-	-	chr_4_2:3563952-3564541	191.493	31.1192	2.62141	0.0247077	0.0400644
fgenesh1_pm.C_scaffold_22000016	E-class P450, group IV;Cytochrome P450	KOG0684 Cytochrome P450	chr_6_4:90354-92014	82.4722	33.0321	1.32004	0.021435	0.0349717
fgenesh1_pm.C_scaffold_3000184	-	-	chr_8_2:1980017-1981092	1103.02	224.488	2.29675	0.00212376	0.00392094
fgenesh1_pm.C_scaffold_3000222	Uroporphyrin-III C/tetrapyrrole (Corrin/Porphyrin) methyltransferase;Diphthine synthase	KOG3123 Diphthine synthase	chr_8_2:1723130-1724128	42.1174	19.3353	1.12318	0.0283016	0.0448241
fgenesh1_pm.C_scaffold_3000326	Amino acid permease-associated region;Amino acid/polyamine transporter I	KOG1289 Amino acid transporters	chr_8_2:1194023-1195724	85.5904	10.5018	3.02681	0.0308643	0.0486764
fgenesh1_pm.C_scaffold_3000397	-	-	chr_8_2:813446-814006	2070.89	221.442	3.22525	8.38e-43	1.05e-41
fgenesh1_pm.C_scaffold_3000411	Protein kinase;Mago nashi protein	KOG3392 Exon-exon junction complex, Magoh component	chr_8_2:753864-754606	180.361	90.0665	1.00182	3.45e-07	9.21e-07
fgenesh1_pm.C_scaffold_3000489	-	-	chr_8_2:334252-335091	56.8915	26.76	1.08814	0.0096319	0.0164222
fgenesh1_pm.C_scaffold_3000492	Phosphopantetheine attachment site	KOG2887 Membrane protein involved in ER to Golgi transport	chr_8_2:311802-313387	305.956	50.1433	2.6092	0.00454022	0.00812031
fgenesh1_pm.C_scaffold_3000528	Snf7	KOG2910 Uncharacterized conserved protein predicted to be involved in protein sorting	chr_8_2:148095-148921	194.406	85.1605	1.19082	4.07e-05	9.09e-05
fgenesh1_pm.C_scaffold_3000546	Metal-dependent protein hydrolase	KOG2948 Predicted metal-binding protein	chr_8_2:84430-85604	74.0428	31.1993	1.24685	0.0161617	0.0269754
fgenesh1_pm.C_scaffold_4000116	Protein of unknown function DUF25	KOG0856 Predicted pilin-like transcription factor	chr_7_1:707461-707979	861.62	169.602	2.3449	0.00220053	0.0040434
fgenesh1_pm.C_scaffold_4000142	Alpha amylase, catalytic region;Glycoside hydrolase, starch-binding;Alpha amylase, catalytic subdomain	KOG0471 Alpha-amylase	chr_7_1:875984-878349	10173.9	196.303	5.69565	0	0
fgenesh1_pm.C_scaffold_4000202	ACN9	KOG4100 Uncharacterized conserved protein	chr_7_1:1281283-1281857	348.255	53.6819	2.69764	0.000397536	0.000802803
fgenesh1_pm.C_scaffold_4000203	Small nuclear ribonucleoprotein (Sm protein);snRNP	KOG3428 Small nuclear ribonucleoprotein SMD1 and related snRNPs	chr_7_1:1283632-1284153	934.86	61.1807	3.9336	9.5e-36	9.88e-35
fgenesh1_pm.C_scaffold_4000256	-	-	chr_7_1:1695958-1696293	58.8835	5.39975	3.4469	0.0293163	0.0463075
fgenesh1_pm.C_scaffold_4000273	-	-	chr_7_1:1745682-1746540	345.444	151.102	1.19293	7.18e-08	2.03e-07
fgenesh1_pm.C_scaffold_5000122	Ribosomal protein L14b/L23e	KOG0901 60S ribosomal protein L14/L17/L23	chr_4_1:1773457-1774280	3712.41	313.592	3.5654	3.13e-106	1.04e-104
fgenesh1_pm.C_scaffold_5000324	Calcium-binding EF-hand	KOG0027 Calmodulin and related proteins (EF-Hand superfamily)	chr_4_1:339649-340265	614.232	104.719	2.55226	9.54e-05	0.000203917
fgenesh1_pm.C_scaffold_6000041	Protein of unknown function UPF0220	KOG3393 Predicted membrane protein	chr_3_4:165974-166728	804.442	127.736	2.65482	2.15e-07	5.91e-07
fgenesh1_pm.C_scaffold_6000145	Glutathione-dependent formaldehyde-activating, GFA	-	chr_3_4:688864-689379	194.857	26.8732	2.85818	0.00193146	0.00357443
fgenesh1_pm.C_scaffold_6000178	Enoyl-CoA hydratase/isomerase	KOG1683 Hydroxyacyl-CoA dehydrogenase/enoyl-CoA hydratase	chr_3_4:847084-847977	268.612	39.4977	2.76568	0.00108289	0.00208285
fgenesh1_pm.C_scaffold_6000238	Eukaryotic protein of unknown function DUF866	KOG1296 Uncharacterized conserved protein	chr_3_4:1351976-1352872	309.406	45.7347	2.75814	0.00035506	0.000718898
fgenesh1_pm.C_scaffold_6000252	Transcription initiation factor IIA, gamma subunit	KOG3463 Transcription initiation factor IIA, gamma subunit	chr_3_4:1411088-1411567	2023.15	315.57	2.68057	1.35e-17	7.07e-17
fgenesh1_pm.C_scaffold_6000326	Phosphoglycerate/bisphosphoglycerate mutase	-	chr_3_4:1800474-1801133	454.782	0.357766	10.3119	2.03e-43	2.57e-42
fgenesh1_pm.C_scaffold_7000123	Protein tyrosine phosphatase-like protein, PTPLA	KOG3187 Protein tyrosine phosphatase-like protein PTPLA (contains Pro instead of catalytic Arg)	chr_5_2:1098840-1099717	48.9062	1.70683	4.84063	0.00145941	0.00276069
fgenesh1_pm.C_scaffold_7000234	Haloacid dehalogenase-like hydrolase;TonB box, N-terminal	KOG3888 Gamma-butyrobetaine,2-oxoglutarate dioxygenase	chr_5_2:359658-361198	74.7571	4.99823	3.90272	0.000738558	0.0014412
fgenesh1_pm.C_scaffold_7000247	-	-	chr_5_2:279348-279728	1687.74	71.6285	4.55842	2.7e-87	7.05e-86
fgenesh1_pm.C_scaffold_7000250	Arylamine N-acetyltransferase;N-acetyltransferase	-	chr_5_2:242570-243624	276.207	2.64178	6.7081	2.45e-23	1.67e-22
fgenesh1_pm.C_scaffold_8000123	Survival protein SurE	-	chr_1_2:673623-674587	256.679	39.1906	2.71139	0.00299276	0.00542879
fgenesh1_pm.C_scaffold_8000264	Peptidase S24, S26A and S26B;Peptidase S26, signal peptidase I;Peptidase S26A, signal peptidase I	KOG0171 Mitochondrial inner membrane protease, subunit IMP1	chr_1_2:1511412-1512030	53.0258	24.898	1.09066	0.0166936	0.0278264
fgenesh1_pm.C_scaffold_8000269	-	-	chr_1_2:1537039-1537581	157.776	57.6686	1.45202	0.0219108	0.0357247
fgenesh1_pm.C_scaffold_9000012	FAD-dependent pyridine nucleotide-disulphide oxidoreductase	KOG1399 Flavin-containing monooxygenase	chr_3_2:1572113-1573981	222.134	3.19934	6.11751	3.83e-17	1.98e-16
fgenesh1_pm.C_scaffold_9000066	GCN5-related N-acetyltransferase	KOG3396 Glucosamine-phosphate N-acetyltransferase	chr_3_2:1267946-1268550	352.404	121.716	1.53371	0.00427912	0.00766559
fgenesh1_pm.C_scaffold_9000099	-	-	chr_3_2:1132006-1132794	93.7265	46.0305	1.02587	0.000316526	0.000644895
fgenesh1_pm.C_scaffold_9000111	FAD-dependent pyridine nucleotide-disulphide oxidoreductase;Pyridine nucleotide-disulphide oxidoreductase, class-II;Pyridine nucleotide-disulphide oxidoreductase, class I	-	chr_3_2:1039473-1040531	1171.13	32.4257	5.17462	3.77e-74	8.43e-73
fgenesh1_pm.C_scaffold_9000171	Adenosine/AMP deaminase;Adenosine deaminase;Adenosine/AMP deaminase active site	KOG1097 Adenine deaminase/adenosine deaminase	chr_3_2:603128-604202	291.315	35.594	3.03287	9.78e-06	2.32e-05
fgenesh1_pm.C_scaffold_9000221	Ribosomal protein L14, bacterial and organelle form;Ribosomal protein L14b/L23e	KOG0901 60S ribosomal protein L14/L17/L23	chr_3_2:368281-368803	379.046	63.337	2.58125	0.00171911	0.00319493
gw1.1.1035.1	Sec61beta	KOG3457 Sec61 protein translocation complex, beta subunit	chr_2_2:1053220-1053673	899.837	47.8771	4.23226	6.6e-41	7.83e-40
gw1.1.1066.1	Protein of unknown function DUF427	-	chr_2_2:612501-612926	217.7	8.22505	4.72617	1.92e-12	7.58e-12
gw1.1.137.1	Glycoside hydrolase, family 31	KOG1065 Maltase glucoamylase and related hydrolases, glycosyl hydrolase family 31	chr_2_2:2726794-2729654	99.2143	41.3725	1.26188	0.00870603	0.0148864
gw1.1.2013.1	-	-	chr_2_2:2657987-2658720	310.352	30.1177	3.36522	2.56e-08	7.52e-08
gw1.1.2035.1	Rhodanese-like	KOG1530 Rhodanese-related sulfurtransferase	chr_2_2:804139-804620	166.733	61.3116	1.44331	0.0134475	0.0225685
gw1.1.2089.1	-	-	chr_2_2:634754-635307	530.329	42.1017	3.65494	3.52e-17	1.82e-16
gw1.1.2166.1	-	-	chr_2_2:2789719-2790053	186.711	3.68381	5.66346	7.73e-14	3.33e-13
gw1.1.2509.1	Iron permease FTR1	-	chr_2_2:2276043-2277128	249.579	1.12365	7.79516	6e-22	3.79e-21
gw1.1.2725.1	-	-	chr_2_2:2791190-2791904	47.4618	1e-05	22.1783	0.000289869	0.000591901
gw1.1.2784.1	-	KOG4148 Uncharacterized conserved protein	chr_2_2:1460664-1460851	4509.5	505.282	3.15781	3.36e-84	8.44e-83
gw1.1.2786.1	Basic helix-loop-helix dimerisation region bHLH	KOG2483 Upstream transcription factor 2/L-myc-2 protein	chr_2_2:3493499-3493738	543.048	39.249	3.79035	2.26e-19	1.28e-18
gw1.1.686.1	-	-	chr_2_2:1218856-1219958	272.08	2.56415	6.72941	5.83e-23	3.88e-22
gw1.10.1033.1	Major facilitator superfamily;General substrate transporter;Tetracycline resistance protein	KOG0255 Synaptic vesicle transporter SVOP and related transporters (major facilitator superfamily)	chr_8_1:195694-196935	560.585	33.0845	4.08271	1.03e-23	7.2e-23
gw1.10.1058.1	E-class P450, group I;Cytochrome P450	KOG0158 Cytochrome P450 CYP3/CYP5/CYP6/CYP9 subfamilies	chr_8_1:53285-54886	126.194	9.62599	3.71256	4.32e-05	9.63e-05
gw1.10.110.1	Acyltransferase ChoActase/COT/CPT	KOG3717 Carnitine O-acyltransferase CRAT	chr_8_1:312148-314268	60.4739	26.818	1.17311	0.0231276	0.0376417
gw1.10.1228.1	-	-	chr_8_1:743421-743809	127.352	60.4246	1.07561	0.000125044	0.000265004
gw1.10.1238.1	-	-	chr_8_1:868715-869076	2027.18	262.858	2.94712	5.96e-29	4.95e-28
gw1.10.460.1	-	-	chr_8_1:1254755-1255067	111.63	12.9084	3.11234	0.00508744	0.00899365
gw1.10.468.1	Splicing factor 3B subunit 10	KOG3485 Uncharacterized conserved protein	chr_8_1:794788-795034	299.548	111.719	1.42291	0.000732595	0.00142984
gw1.10.732.1	-	-	chr_8_1:299683-300834	253.036	7.17233	5.14076	3.08e-16	1.5e-15
gw1.10.773.1	-	-	chr_8_1:308442-309798	66.1471	2.22849	4.89154	0.000265187	0.000543817
gw1.11.1147.1	Ribosomal protein L27	KOG4600 Mitochondrial ribosomal protein MRP7 (L2)	chr_1_1:1433753-1434356	152.382	66.5812	1.19451	0.000391031	0.0007903
gw1.11.1148.1	-	KOG3306 Predicted membrane protein	chr_1_1:1591286-1592338	182.604	66.7314	1.45228	0.0144549	0.0242028
gw1.11.1181.1	CsbD-like	-	chr_1_1:993561-994138	165.307	66.0291	1.32397	0.00190607	0.00352873
gw1.11.1214.1	-	-	chr_1_1:1313704-1313941	4055.62	1640.39	1.30588	5.57e-53	8.7e-52
gw1.11.382.1	-	KOG3852 Uncharacterized conserved protein	chr_1_1:1592805-1593603	495.7	157.099	1.65779	0.0150106	0.0251166
gw1.11.468.1	-	KOG4844 Mitochondrial ribosomal protein S27	chr_1_1:1640609-1641130	849.814	291.927	1.54154	1.6e-05	3.73e-05
gw1.11.878.1	-	KOG4157 beta-1,6-N-acetylglucosaminyltransferase, contains WSC domain	chr_1_1:738559-739343	4082.71	708.185	2.52733	1.13e-22	7.4e-22
gw1.12.224.1	-	KOG3332 N-acetylglucosaminyl phosphatidylinositol de-N-acetylase	chr_3_1:74455-75012	194.331	26.4678	2.87621	0.00193146	0.00357443
gw1.12.289.1	-	-	chr_3_1:82416-83155	4689.44	498.127	3.23483	5.13e-96	1.49e-94
gw1.12.305.1	Mpv17/PMP22	KOG1944 Peroxisomal membrane protein MPV17 and related proteins	chr_3_1:849298-850097	263.42	15.9007	4.0502	9.01e-12	3.44e-11
gw1.12.314.1	Zn-finger, RING	KOG1493 Anaphase-promoting complex (APC), subunit 11	chr_3_1:808569-809010	124.153	2.98785	5.37687	3.22e-09	1.02e-08
gw1.12.429.1	Major facilitator superfamily	KOG0255 Synaptic vesicle transporter SVOP and related transporters (major facilitator superfamily)	chr_3_1:506548-508159	138.418	20.783	2.73556	0.0234607	0.0381653
gw1.12.497.1	O-methyltransferase, family 2;Generic methyltransferase	KOG3178 Hydroxyindole-O-methyltransferase and related SAM-dependent methyltransferases	chr_3_1:504620-505519	3626.23	1.33362	11.4089	0	0
gw1.12.569.1	Esterase/lipase/thioesterase	-	chr_3_1:76645-77676	135.819	51.3909	1.4021	0.0142269	0.0238489
gw1.12.627.1	Vacuolar (H+)-ATPase G subunit	KOG1772 Vacuolar H+-ATPase V1 sector, subunit G	chr_3_1:1062717-1063333	2518.12	508.693	2.30748	1.29e-06	3.27e-06
gw1.12.810.1	Short-chain dehydrogenase/reductase SDR;Glucose/ribitol dehydrogenase	KOG1611 Predicted short chain-type dehydrogenase	chr_3_1:105112-106083	1261.8	15.7804	6.32121	1.61e-99	4.91e-98
gw1.13.207.1	-	-	chr_6_2:811524-812620	3482.38	281.939	3.62662	4.17e-105	1.36e-103
gw1.13.335.1	-	KOG3450 Huntingtin interacting protein HYPK	chr_6_2:921649-922153	137.876	14.2785	3.27146	0.000817152	0.00159056
gw1.13.718.1	Glutaredoxin;Glutaredoxin-related protein	KOG0911 Glutaredoxin-related protein	chr_6_2:25597-26082	1177.06	232.06	2.34262	0.000345192	0.000700325
gw1.13.903.1	P-II protein urydylation site	-	chr_6_2:17579-18089	622.203	88.8208	2.80842	5.7e-08	1.64e-07
gw1.13.920.1	-	-	chr_6_2:111861-112035	970.697	397.14	1.28937	1.03e-14	4.71e-14
gw1.14.154.1	-	-	chr_6_1:1414194-1415406	47.2718	0.355989	7.053	0.000289869	0.000591901
gw1.14.247.1	Saposin B	-	chr_6_1:1369003-1369261	1380.89	74.8875	4.20473	3.21e-61	5.96e-60
gw1.14.484.1	-	-	chr_6_1:1463403-1463809	28.0918	1e-05	21.4217	0.0202352	0.0332078
gw1.14.578.1	-	KOG4157 beta-1,6-N-acetylglucosaminyltransferase, contains WSC domain	chr_6_1:1511232-1512484	113.191	7.06448	4.00203	3.93e-05	8.78e-05
gw1.15.195.1	ATP phosphoribosyltransferase	KOG2831 ATP phosphoribosyltransferase	chr_2_1:269048-270052	77.7156	34.7781	1.16003	0.00685071	0.0119846
gw1.15.221.1	-	-	chr_2_1:755614-756635	200.491	3.76956	5.733	4.04e-15	1.87e-14
gw1.15.238.1	-	KOG4157 beta-1,6-N-acetylglucosaminyltransferase, contains WSC domain	chr_2_1:119737-120435	788.112	22.593	5.12445	1.19e-49	1.72e-48
gw1.15.335.1	Fungal transcriptional regulatory protein, N-terminal	-	chr_2_1:596221-598235	53.6676	24.5812	1.1265	0.0166936	0.0278264
gw1.16.197.1	-	-	chr_5_1:544500-545528	92.7517	2.60964	5.15145	1.47e-06	3.72e-06
gw1.16.243.1	-	-	chr_5_1:710155-710571	48.2417	2.76554	4.12465	0.00549726	0.00970281
gw1.16.498.1	-	-	chr_5_1:452372-453191	447.61	7.81828	5.83925	1.55e-33	1.52e-32
gw1.17.176.1	HesB/YadR/YfhF	KOG1120 Fe-S cluster biosynthesis protein ISA1 (contains a HesB-like domain)	chr_6_2:1523423-1524135	811.885	292.273	1.47396	6.1e-07	1.61e-06
gw1.17.206.1	-	-	chr_6_2:1445725-1446225	1874.79	532.725	1.81527	0.0256677	0.0415543
gw1.17.423.1	Fungal transcriptional regulatory protein, N-terminal;Fungal specific transcription factor	-	chr_6_2:1708481-1710329	98.7296	41.31	1.25699	0.008414	0.014392
gw1.18.205.1	-	-	chr_5_3:535384-535641	2643.31	179.793	3.87794	5.2e-96	1.5e-94
gw1.18.229.1	Serine/threonine protein kinase;Tyrosine protein kinase;Protein kinase;Serine/threonine protein kinase, active site	KOG0255 Synaptic vesicle transporter SVOP and related transporters (major facilitator superfamily)	chr_5_3:386194-390971	52.7781	23.4364	1.17119	0.0227426	0.037027
gw1.19.30.1	Endonuclease/exonuclease/phosphatase	-	chr_6_1:298906-300927	65.2566	3.27871	4.31492	0.000967439	0.00186794
gw1.19.519.1	-	-	chr_6_1:275188-275419	440.117	35.0671	3.6497	2.42e-14	1.08e-13
gw1.2.1009.1	-	KOG3364 Membrane protein involved in organellar division	chr_4_2:565272-565761	1790.95	143.87	3.63789	3.63e-55	5.89e-54
gw1.2.1032.1	-	-	chr_4_2:3066305-3066856	254.5	35.7988	2.82968	0.000574927	0.00113532
gw1.2.1046.1	-	KOG3390 General control of amino-acid synthesis 5-like 1	chr_4_2:596198-596651	241.019	31.2366	2.94784	0.000217078	0.00045085
gw1.2.1441.1	Amino acid permease-associated region;Amino acid/polyamine transporter I	KOG1289 Amino acid transporters	chr_4_2:1485500-1487241	103.258	13.5112	2.93403	0.0216639	0.0353393
gw1.2.2020.1	ARP2/3 complex 16 kDa subunit (p16-Arc)	KOG3380 Actin-related protein Arp2/3 complex, subunit ARPC5	chr_4_2:1583028-1583690	1057.04	173.966	2.60315	2.43e-08	7.18e-08
gw1.2.2105.1	RNA-binding region RNP-1 (RNA recognition motif)	KOG0114 Predicted RNA-binding protein (RRM superfamily)	chr_4_2:3601620-3602389	860.125	327.193	1.3944	1.53e-09	4.95e-09
gw1.2.2468.1	TonB box, N-terminal	-	chr_4_2:3605200-3605909	73.1995	32.6739	1.1637	0.0109371	0.0186003
gw1.2.2628.1	Thioesterase superfamily	KOG3328 HGG motif-containing thioesterase	chr_4_2:798422-798734	250.488	18.2489	3.77886	2.13e-09	6.85e-09
gw1.2.2630.1	Cytochrome c heme-binding site;CHY zinc finger	KOG1940 Zn-finger protein	chr_4_2:2782826-2783533	270.396	118.787	1.1867	1.98e-06	4.97e-06
gw1.2.2651.1	-	-	chr_4_2:722410-722611	3076.86	78.0001	5.30184	5.15e-199	3.71e-197
gw1.2.2665.1	-	-	chr_4_2:1970704-1971138	26.3691	1e-05	21.3304	0.0306955	0.0484254
gw1.2.780.1	-	-	chr_4_2:2468896-2470161	168.408	78.9856	1.0923	1.74e-05	4.03e-05
gw1.2.893.1	Histone-fold/TFIID-TAF/NF-Y;Transcription factor CBF/NF-Y/archaeal histone	KOG1659 Class 2 transcription repressor NC2, alpha subunit (DRAP1)	chr_4_2:324109-325073	86.2539	42.426	1.02364	0.000638021	0.00125499
gw1.2.956.1	Ribosomal protein S18	KOG3162 Mitochondrial/chloroplast ribosomal protein S18	chr_4_2:3664566-3665351	530.5	75.5778	2.81132	6.72e-07	1.77e-06
gw1.20.182.1	Actin-binding, cofilin/tropomyosin type	KOG1747 Protein tyrosine kinase 9/actin monomer-binding protein	chr_6_3:240910-242069	134.441	53.0966	1.34028	0.00644998	0.0113327
gw1.21.201.1	-	-	chr_3_3:92149-92889	491.84	210.689	1.22307	1.14e-09	3.72e-09
gw1.22.48.1	-	-	chr_6_4:124914-125586	41.1665	0.314436	7.03256	0.00103508	0.00199395
gw1.272.10.1	-	-	chr_6_1:668680-669156	6575.95	1e-05	29.2926	0	0
gw1.3.1032.1	Protein of unknown function DUF1242	KOG3808 Uncharacterized conserved protein	chr_8_2:181296-181587	1550.68	90.3143	4.1018	9.29e-65	1.84e-63
gw1.3.1420.1	Major facilitator superfamily	KOG0255 Synaptic vesicle transporter SVOP and related transporters (major facilitator superfamily)	chr_8_2:893686-895268	556.006	26.7173	4.37925	1.66e-27	1.34e-26
gw1.3.1868.1	Ribosomal protein L17	KOG3280 Mitochondrial/chloroplast ribosomal protein L17	chr_8_2:190968-191593	147.962	63.8753	1.2119	0.000597576	0.00117911
gw1.3.1936.1	Ribosomal L32p protein	KOG4080 Mitochondrial ribosomal protein L32	chr_8_2:51787-52115	548.841	52.6895	3.3808	2.25e-14	1e-13
gw1.3.1956.1	-	-	chr_8_2:868694-868994	251.4	43.8036	2.52086	0.0204927	0.0336139
gw1.3.2188.1	-	KOG4157 beta-1,6-N-acetylglucosaminyltransferase, contains WSC domain	chr_8_2:244771-246071	835.057	372.289	1.16545	3.99e-18	2.15e-17
gw1.3.2399.1	Plectin/S10, N-terminal	KOG3344 40s ribosomal protein s10	chr_8_2:2606805-2607419	2977.26	501.044	2.57098	4.55e-19	2.57e-18
gw1.3.476.1	-	-	chr_8_2:3113466-3115277	142.397	7.5916	4.22937	2.62e-07	7.12e-07
gw1.3.832.1	-	-	chr_8_2:1123895-1124667	355.355	5.31772	6.06231	4.59e-27	3.64e-26
gw1.3.856.1	-	-	chr_8_2:2954155-2954649	100.285	1e-05	23.2576	3.68e-09	1.16e-08
gw1.4.1479.1	-	-	chr_7_1:387852-388317	142.181	12.358	3.52421	8.48e-05	0.000184508
gw1.4.1485.1	-	-	chr_7_1:2313534-2314021	399.546	74.4391	2.42423	0.0140697	0.0235932
gw1.4.1514.1	Chaperonin Cpn10	KOG1641 Mitochondrial chaperonin	chr_7_1:196299-196697	8422.64	200.193	5.39481	0	0
gw1.4.600.1	Tudor	KOG3026 Splicing factor SPF30	chr_7_1:1960969-1961849	242.49	102.01	1.24921	3.05e-05	6.87e-05
gw1.5.1283.1	Ribosomal protein L19	KOG1698 Mitochondrial/chloroplast ribosomal protein L19	chr_4_1:787845-788355	600.696	110.088	2.44798	0.00151078	0.00285411
gw1.5.1297.1	Ubiquitin-conjugating enzymes	KOG0425 Ubiquitin-protein ligase	chr_4_1:882381-883300	308.25	133.4	1.20834	7.96e-07	2.09e-06
gw1.5.1347.1	-	-	chr_4_1:1014745-1015153	1132.64	12.1337	6.54453	4.88e-91	1.34e-89
gw1.5.1735.1	H+-transporting two-sector ATPase, C subunit;Vacuolar H+-transporting two-sector ATPase, C subunit eukaryotic;Vacuolar H+-transporting two-sector ATPase, C subunit	KOG0232 Vacuolar H+-ATPase V0 sector, subunits c/c'	chr_4_1:1168410-1169348	1448.7	108.016	3.74544	2.6e-48	3.66e-47
gw1.5.551.1	Peptidase A4, scytalidopepsin B	-	chr_4_1:2187146-2187798	213.117	0.524544	8.66637	7.38e-20	4.3e-19
gw1.5.631.1	-	-	chr_4_1:2330991-2331634	69.9414	31.4168	1.15461	0.00910164	0.0155444
gw1.5.634.1	TPR repeat	-	chr_4_1:499964-500624	243.237	38.1369	2.6731	0.00607546	0.0106952
gw1.6.1088.1	Class I peptide chain release factor	KOG2726 Mitochondrial polypeptide chain release factor	chr_3_4:372167-372662	156.128	66.6063	1.229	0.000616177	0.00121487
gw1.6.1113.1	-	-	chr_3_4:1715780-1716069	620990	11603.3	5.74196	0	0
gw1.6.332.1	D-isomer specific 2-hydroxyacid dehydrogenase, NAD-binding;D-isomer specific 2-hydroxyacid dehydrogenase, catalytic region	KOG0069 Glyoxylate/hydroxypyruvate reductase (D-isomer-specific 2-hydroxy acid dehydrogenase superfamily)	chr_3_4:128241-129656	517.577	16.3961	4.98035	2.07e-31	1.87e-30
gw1.6.553.1	-	-	chr_3_4:126792-127178	450.049	86.1008	2.38598	0.018176	0.0299406
gw1.6.573.1	-	-	chr_3_4:1411969-1412182	25.0204	1e-05	21.2547	0.0294846	0.0465588
gw1.7.288.1	-	-	chr_5_2:272676-273237	400.81	18.7253	4.41986	1.9e-20	1.13e-19
gw1.7.348.1	-	-	chr_5_2:264101-264707	94.2194	7.66495	3.61968	0.000818794	0.00159345
gw1.7.433.1	Thaumatin, pathogenesis-related	-	chr_5_2:1045257-1045695	17949.7	2166.79	3.05033	2.09e-286	2.39e-284
gw1.8.255.1	GCN5-related N-acetyltransferase	-	chr_1_2:438359-440693	898.699	105.732	3.08743	1.97e-16	9.81e-16
gw1.9.339.1	Yeast cell wall synthesis KRE9KNH1	-	chr_3_2:54546-55550	322.262	34.026	3.24352	1.15e-07	3.2e-07
gw1.9.353.1	-	-	chr_3_2:298373-299093	48.2432	3.06757	3.97516	0.0166309	0.0277264
gw1.9.435.1	Membrane-associated proteins in eicosanoid and glutathione metabolism (MAPEG)	-	chr_3_2:310517-311068	554.489	76.4802	2.858	1.04e-07	2.92e-07
gw1.9.441.1	Mitochondrial ATP synthase epsilon chain	KOG3495 Mitochondrial F1F0-ATP synthase, subunit epsilon/ATP15	chr_3_2:644399-644751	21080	4422.86	2.25282	8.55e-33	8.19e-32
